# Supplementary material for: An energy decomposition and extrapolation scheme for evaluating electron transfer rate constants: a case study on electron self-exchange reactions of transition metal complexes
Source: Royal Society of Chemistry journal article supplement (doi:10.1039/d3ra05784d), 2023-01-01
Supplement: d3ra05784d1.pdf [file d3ra05784d1.pdf]

Electronic supplementary information:

An energy decomposition and extrapolation scheme for evaluating electron transfer rate constants: A case study on electron self-exchange reactions of transition metal complexes

Akihiro Mutsuji<sup>1</sup>, Kenichiro Saita<sup>2</sup>, and Satoshi Maeda<sup>\*2,3,4,5</sup>

<sup>1</sup>Graduate School of Chemical Sciences and Engineering, Hokkaido University; Sapporo Hokkaido 060-8628, Japan

<sup>2</sup>Department of Chemistry, Graduate School of Science, Hokkaido University; Sapporo, Hokkaido 060-0810, Japan

<sup>3</sup>Institute for Chemical Reaction Design and Discovery (WPI-ICReDD), Hokkaido University; Sapporo, Hokkaido 001-0021, Japan

<sup>4</sup>ERATO Maeda Artificial Intelligence for Chemical Reaction Design and Discovery Project, Hokkaido University; Sapporo, Hokkaido 060-0810, Japan

<sup>5</sup>Research and Services Division of Materials Data and Integrated System (MaDIS), National Institute for Materials Science (NIMS); Tsukuba, Ibaraki 305-0044, Japan

## Contents

1. Initial SX geometry preparation
2. Maximization of electron transfer reaction rate constants
3. Cartesian coordinates and energies of the most stable monomer equilibrium geometries in Gibbs energy with charge 3+ and 2+ at the U $\omega$ B97X-D/Def2-TZVP//Def2-SV(P) level
4. Cartesian coordinates and energies of SX geometries obtained from the initial SX geometry generation at the U $\omega$ B97X-D/Def2-SV(P) level
5. Cartesian coordinates and energies of MESX geometries by EDEEL with metal-metal distance fixed to  $r_{DA}(ini)$  at the U $\omega$ B97X-D/Def2-SV(P) level
6. Cartesian coordinates and energies of MESX geometries with metal-metal distances showing maximum electron self-exchange reaction rate constants at the U $\omega$ B97X-D/Def2-TZVP//Def2-SV(P) level

## 1. Initial SX geometry preparation

The initial SX structure for the subsequent rate constant maximization along the metal-metal distance was generated as a MESX geometry between the following  $E'_1$  and  $E'_2$ ,

$$E'_1 = V_{11} + \Delta E_1^{MM} \#(S1)$$

$$E'_2 = V_{22} + \Delta E_2^{MM} \#(S2)$$

where the molecular mechanics (MM) correction terms are expressed as follows,

$$\Delta E_1^{MM} = (E_{n+m+1}^{C-MM-Initial} - E_{n+1}^{D-MM} - E_m^{A-MM}) - (E_{n+m}^{C-MM} - E_n^{D-MM} - E_m^{A-MM}) \#(S3)$$

$$\Delta E_2^{MM} = (E_{n+m+1}^{C-MM-Final} - E_n^{D-MM} - E_{m+1}^{A-MM}) - (E_{n+m}^{C-MM} - E_n^{D-MM} - E_m^{A-MM}) \#(S4)$$

where  $n$  and  $m$ , respectively, are the number of electrons in the donor and acceptor species ( $n = m$  in the electron self-exchange reactions), the subscript for each  $E$  corresponds to the number of electrons

in the corresponding system,  $E_{n+m+1}^{C-MM-Initial}$  and  $E_{n+m+1}^{C-MM-Final}$ , respectively, are the MM energies of

the donor-acceptor complex with the charge distributions of the initial and final states, and  $E_n^{D-MM}$ ,

$E_m^{A-MM}$ ,  $E_{n+1}^{D-MM}$ , and  $E_{m+1}^{A-MM}$ , respectively, are the MM energies of the donor and acceptor species. In

other words, these MM terms represent the interaction between the moving electron and the corresponding counterpart, which is missing in  $V_{11}$  and  $V_{22}$ . An MESX geometry between  $E'_1$  and  $E'_2$  can be a good initial guess of the final geometry to compute  $k_{calc}$ . Therefore, the donor-acceptor distance at the MESX geometry between  $E'_1$  and  $E'_2$  is set as  $r_{DA}(ini)$ . In the MM calculations, the universal force field<sup>1</sup> implemented in the Gaussian16 program was employed, where atomic charges were obtained by the DFT calculation with the keyword “pop=MKUFF”.<sup>2,3</sup>

1 A. K. Rappe, C. J. Casewit, K. S. Colwell, W. A. Goddard and W. M. Skiff, *J. Am. Chem. Soc.*, 1992, **114**, 10024.

2 U. C. Singh and P. A. Kollman, *J. Comput. Chem.*, 1984, **5**, 129.

3 B. H. Besler, K. M. Merz Jr. and P. A. Kollman, *J. Comput. Chem.*, 1990, **11**, 431.

## 2. Maximization of electron transfer reaction rate constants

Starting from  $r_{\text{DA}}(\text{ini})$ ,  $k_{\text{ET}}$  is maximized along the metal-metal distance  $r_{\text{DA}}$ , while  $k_{\text{ET}}$  is evaluated by the following equation.

$$k_{\text{ET}} = \left(\frac{RT}{p^0}\right)^q \kappa_{\text{el}} \nu_n \exp\left(-\frac{\Delta G^\ddagger}{RT}\right) \#(1)$$

1. A scaling factor  $x$  is set to 1.0.
2. An increment  $d$  is set to 0.0125.
3. The iteration number  $n$  is set to 1.
4. A MESX is optimized while keeping  $r_{\text{DA}}$  at  $xr_{\text{DA}}(\text{ini})$  by translation of the central metal atom in one complex. If  $x = 1.0 + (2a + 1)d$  ( $a = 0, 1, 2, \dots$ ), “Int(Grid=FineGrid)” option for DFT calculation and “Opt=Loose” for geometry optimization were used. Else, “Int(Grid=99590)” option was used.
5. If  $x = 1.0 + (2a + 1)d$  ( $a = 0, 1, 2, \dots$ ), add  $d$  to  $x$  and return to step 4. Else, perform the single point calculation with larger basis set at the MESX obtained in step4, and extrapolate the Gibbs energy of the MESX.
6.  $k_{\text{ET}}$  at this iteration  $k_{\text{ET}}(n)$  is calculated with eqn (1) at the MESX obtained in step 4 using the extrapolated Gibbs energy obtained in step 5.
7. If not  $x = 1.1$  nor  $n > 5$ , add  $d$  to  $x$ , increase  $n$  by 1, and return to step 4.
8. Calculate  $k_{\text{harmonic}}$  as the maximum along a harmonic curve including the point with the largest  $\log_{10}k_{\text{ET}}(m)$  and its two neighbors. If  $|k_{\text{harmonic}} - k_{\text{ET}}(m)| < 0.1$ , then set the final  $k_{\text{calc}} = k_{\text{ET}}(m)$  and exit. Else, set  $x$  to the value of the maximum point along the harmonic curve, increase  $n$  by 1, and return to step 4.

Below, the actual  $\log_{10}k_{\text{ET}}$  maximization processes for the thirteen transition metal complexes are presented in Fig. S1-S13.

Plots of  $\log_{10}k_{\text{ET}}$  maximization at the  $U\omega B97X-D/Def2-TZVP//Def2-SV(P)$  level

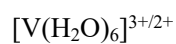

Cycle 1 (Converged)

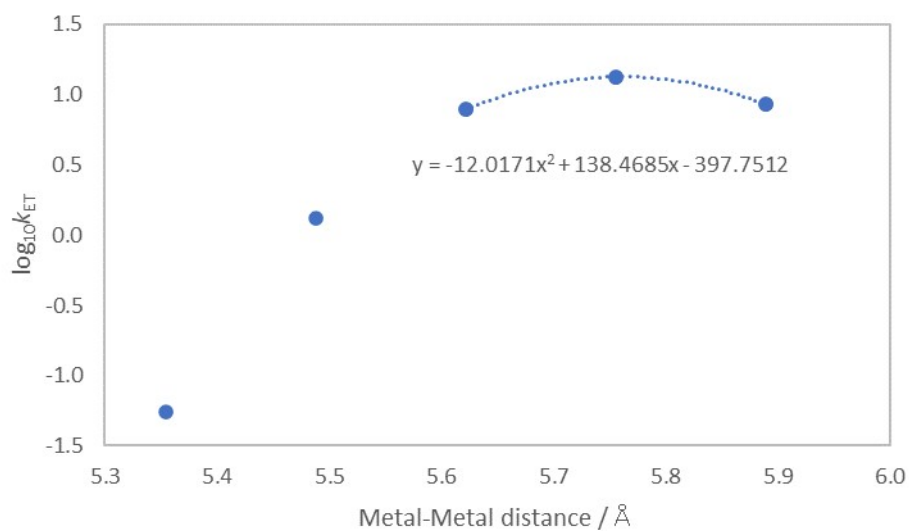

**Fig. S1** Plots of  $\log_{10}k_{\text{ET}}$  maximization for  $[\text{V}(\text{H}_2\text{O})_6]^{3+/2+}$  (Cycle 1).

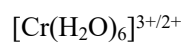

Cycle 1 (Converged)

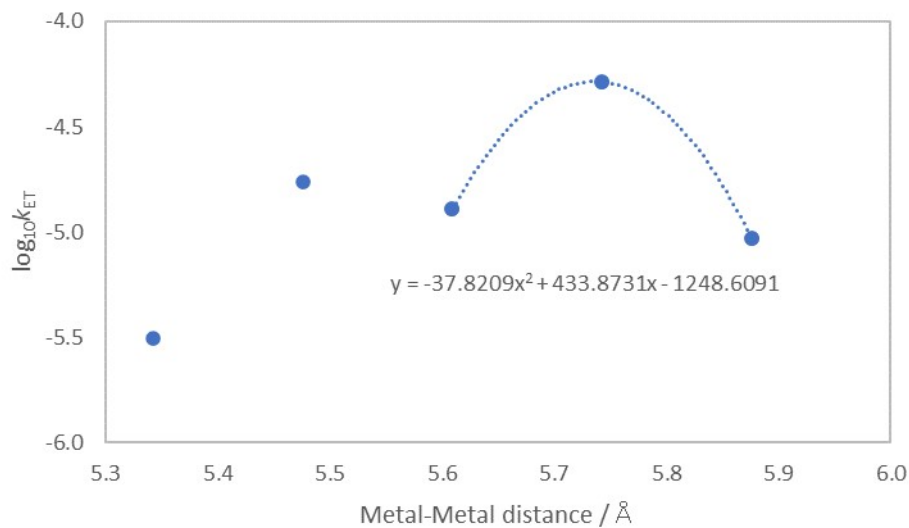

**Fig. S2** Plots of  $\log_{10}k_{\text{ET}}$  maximization for  $[\text{Cr}(\text{H}_2\text{O})_6]^{3+/2+}$  (Cycle 1).

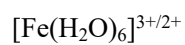

Cycle 1 (Converged)

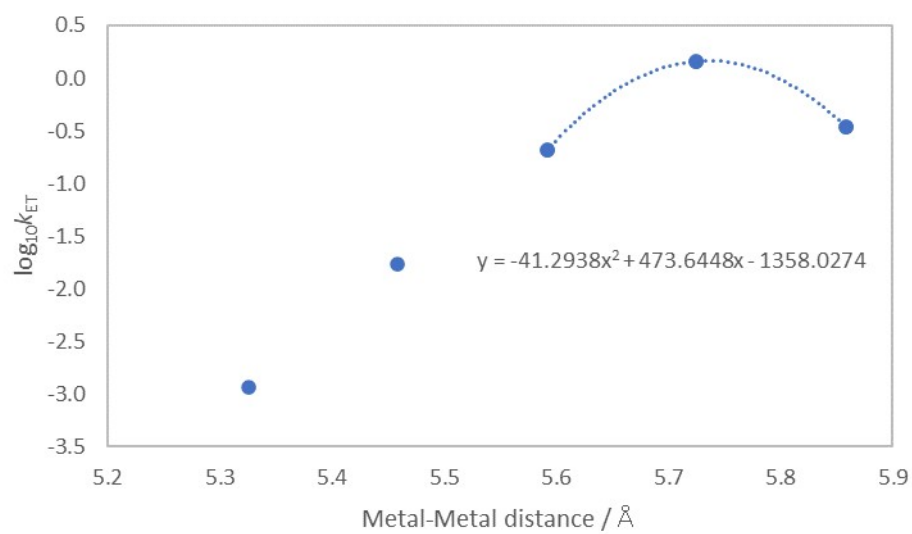

**Fig. S3** Plots of  $\log_{10}k_{\text{ET}}$  maximization for  $[\text{Fe}(\text{H}_2\text{O})_6]^{3+/2+}$  (Cycle 1).

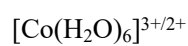

Cycle 1 (Converged)

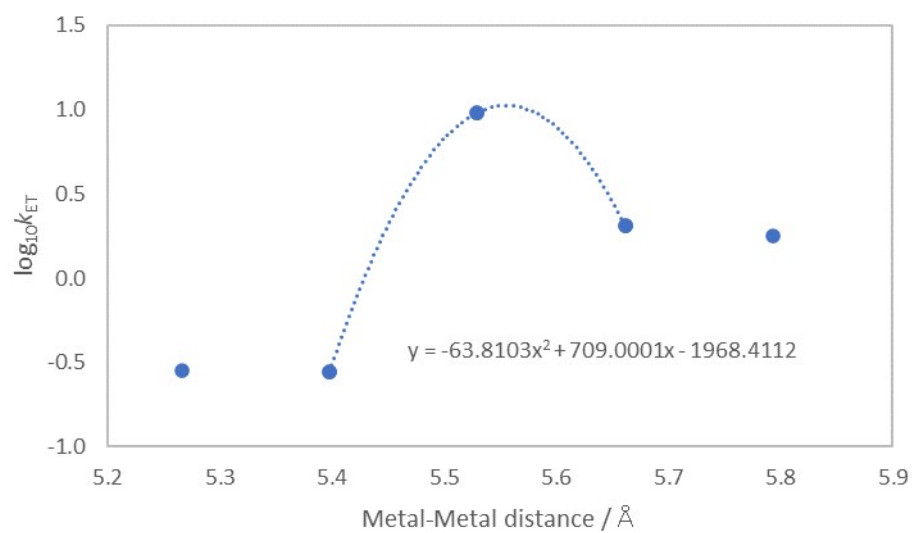

**Fig. S4** Plots of  $\log_{10}k_{\text{ET}}$  maximization for  $[\text{Co}(\text{H}_2\text{O})_6]^{3+/2+}$  (Cycle 1).

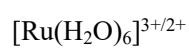

Cycle 1 (Not Converged)

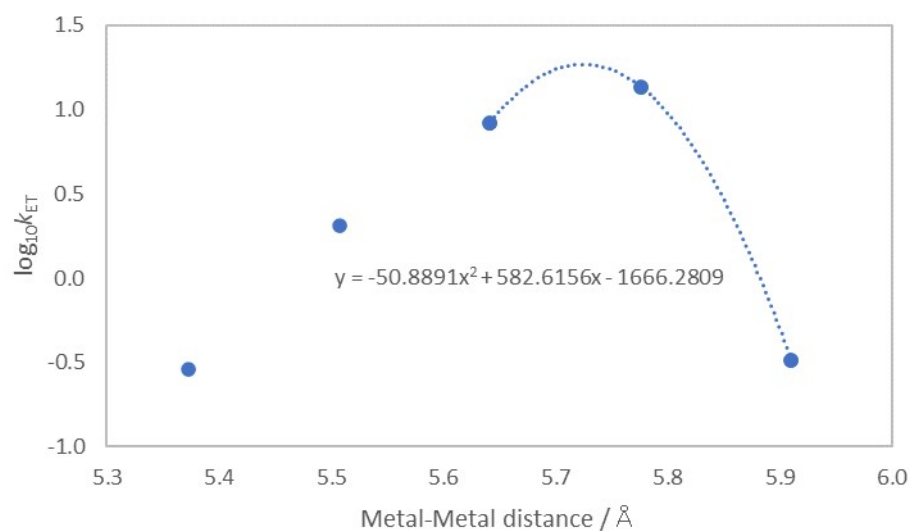

(a)

Cycle 2 (Converged)

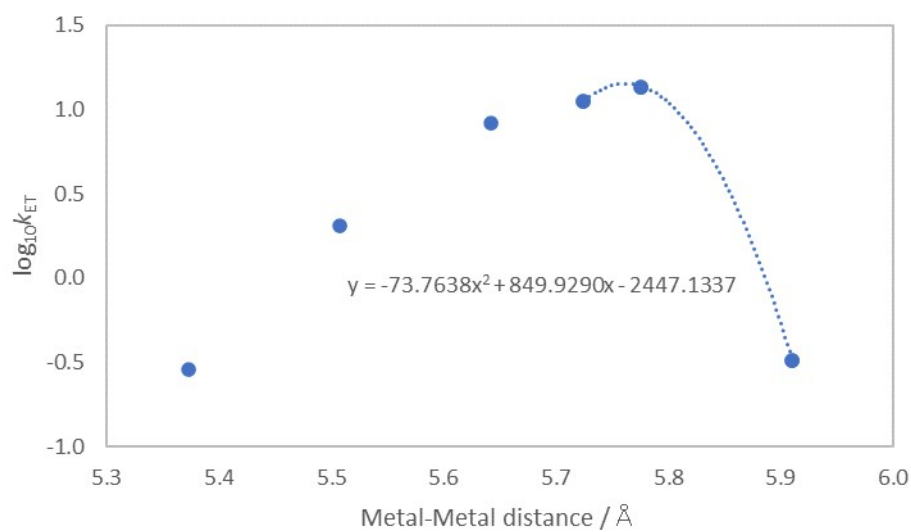

(b)

**Fig. S5** Plots of  $\log_{10}k_{\text{ET}}$  maximization for  $[\text{Ru}(\text{H}_2\text{O})_6]^{3+/2+}$ . (a) Cycle 1, (b) Cycle2.

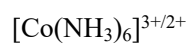

Cycle 1 (Converged)

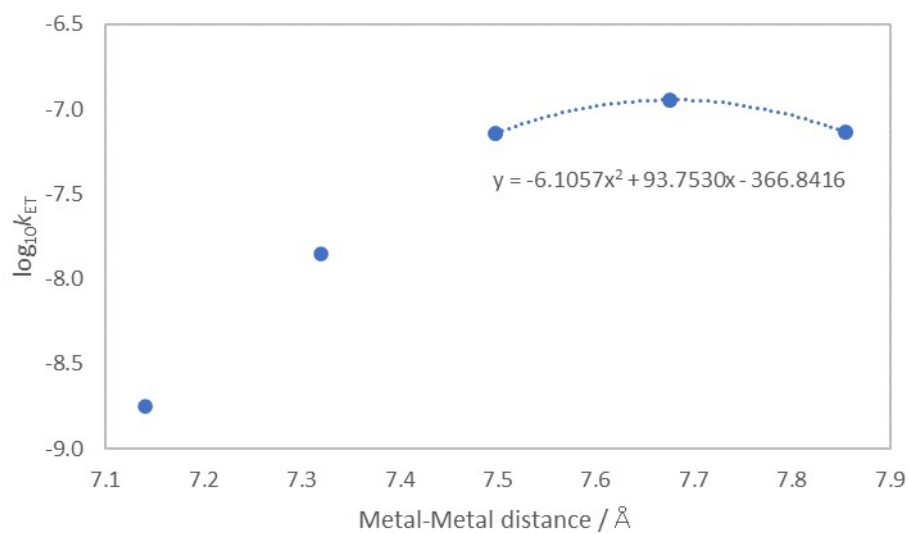

**Fig. S6** Plots of  $\log_{10}k_{\text{ET}}$  maximization for  $[\text{Co}(\text{NH}_3)_6]^{3+/2+}$  (Cycle 1).

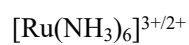

Cycle 1 (Converged)

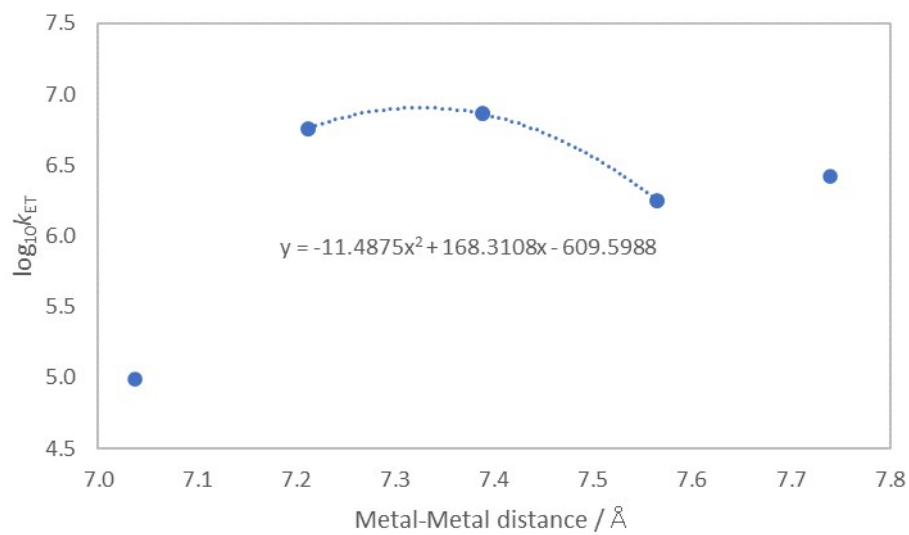

**Fig. S7** Plots of  $\log_{10}k_{\text{ET}}$  maximization for  $[\text{Ru}(\text{NH}_3)_6]^{3+/2+}$  (Cycle 1).

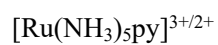

Cycle 1 (Converged)

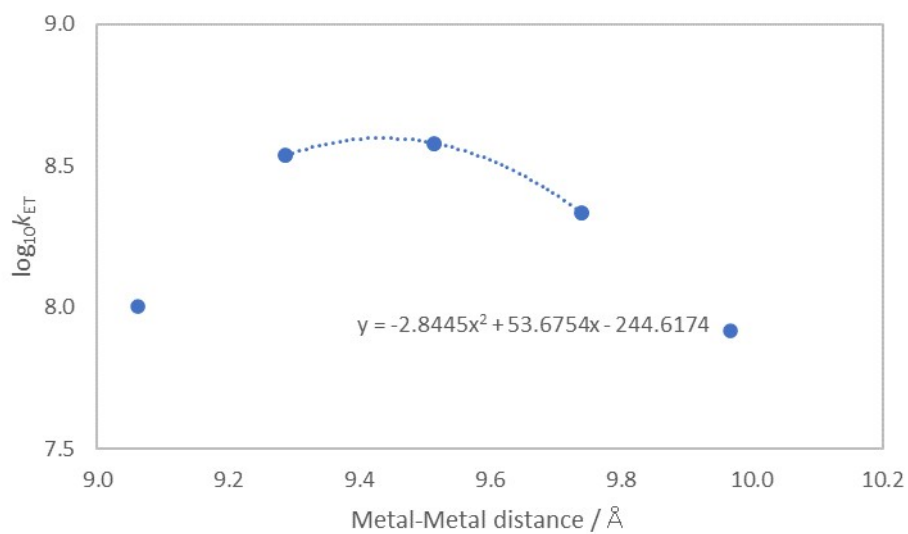

**Fig. S8** Plots of  $\log_{10}k_{\text{ET}}$  maximization for  $[\text{Ru}(\text{NH}_3)_5\text{py}]^{3+/2+}$  (Cycle 1).

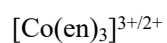

Cycle 1 (Converged)

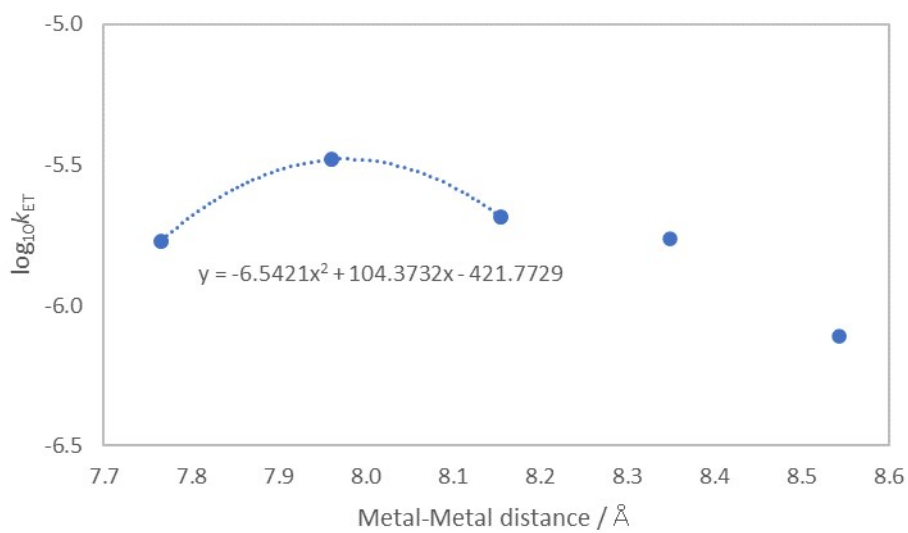

**Fig. S9** Plots of  $\log_{10}k_{\text{ET}}$  maximization for  $[\text{Co}(\text{en})_3]^{3+/2+}$  (Cycle 1).



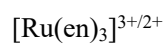

Cycle 1 (Converged)

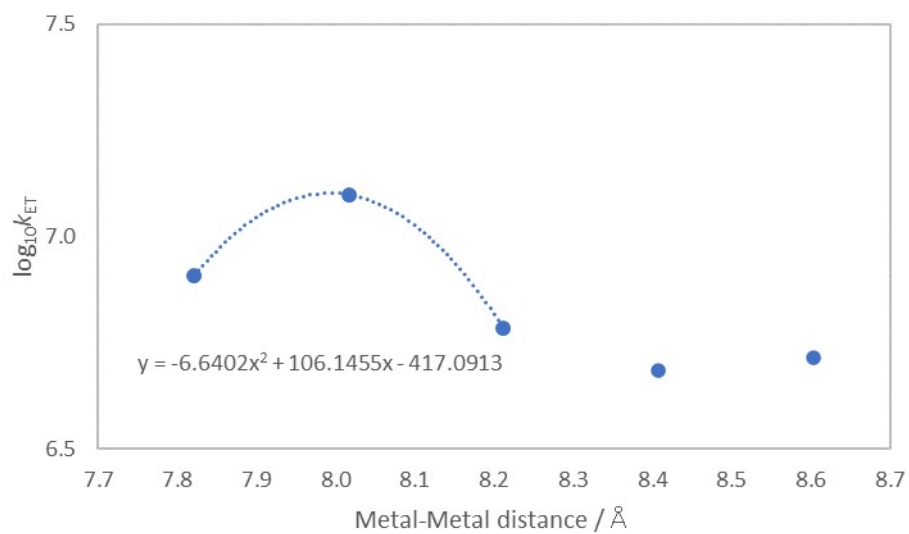

**Fig. S10** Plots of  $\log_{10}k_{\text{ET}}$  maximization for  $[\text{Ru}(\text{en})_3]^{3+/2+}$  (Cycle 1).

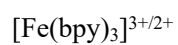

Cycle 1 (Converged)

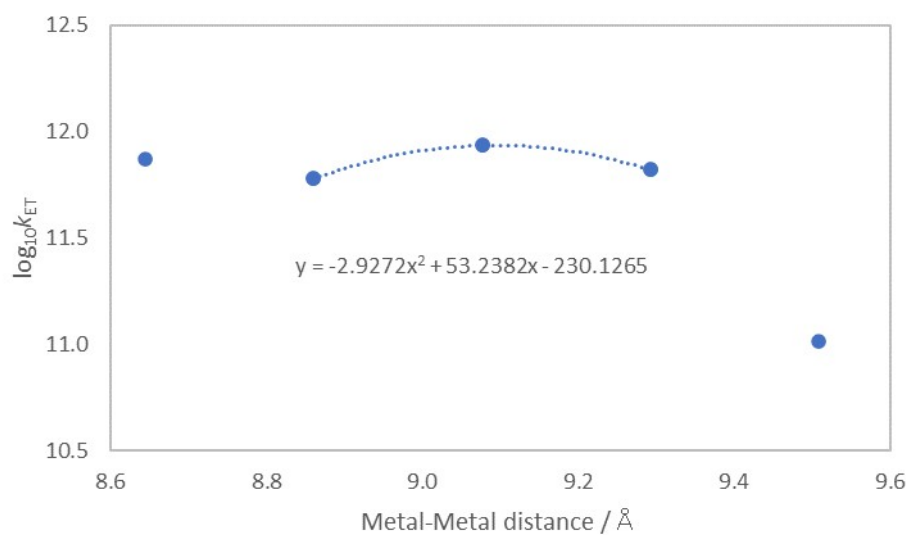

**Fig. S11** Plots of  $\log_{10}k_{\text{ET}}$  maximization for  $[\text{Fe}(\text{bpy})_3]^{3+/2+}$  (Cycle 1).

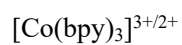

Cycle 1 (Converged)

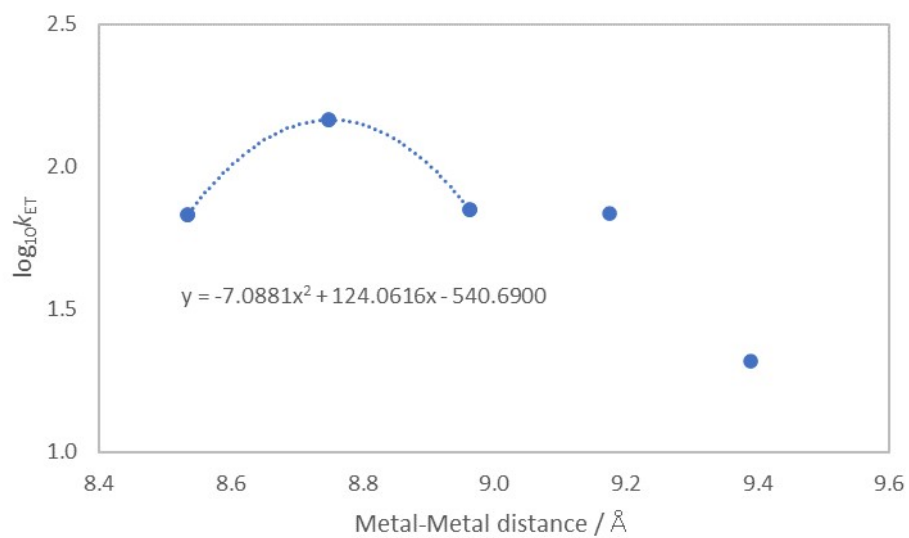

**Fig. S12** Plots of  $\log_{10}k_{\text{ET}}$  maximization for  $[\text{Co}(\text{bpy})_3]^{3+/2+}$  (Cycle 1).

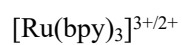

Cycle 1 (Converged)

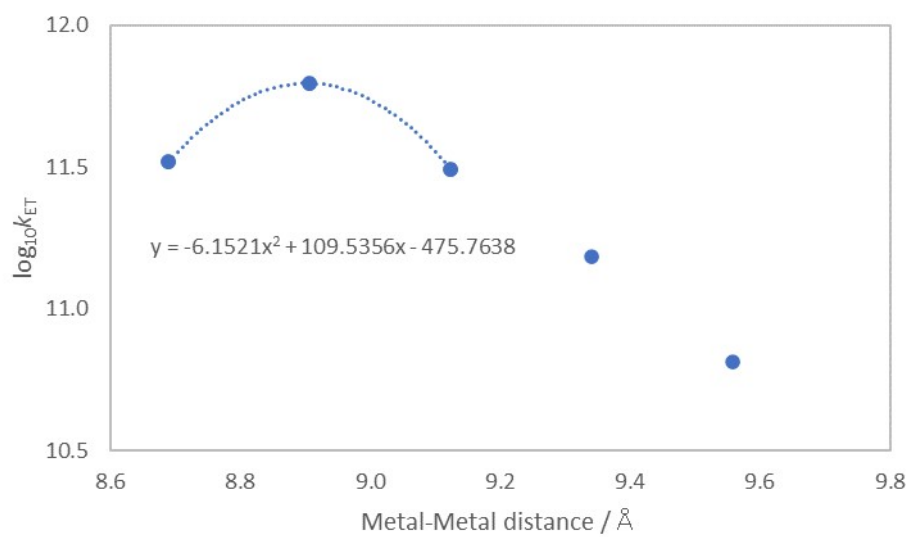

**Fig. S13** Plots of  $\log_{10}k_{\text{ET}}$  maximization for  $[\text{Ru}(\text{bpy})_3]^{3+/2+}$  (Cycle 1).

### 3. Cartesian coordinates and energies of the most stable monomer equilibrium geometries in Gibbs energy with charge 3+ and 2+ at the U $\omega$ B97X-D/Def2-TZVP//Def2-SV(P) level

Extrapolated Gibbs energies of the most stable monomers in Gibbs energy were used for calculation of Gibbs energy barrier  $\Delta G^\ddagger$ . In the following, energy values are given in Hartree.

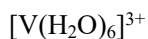

$E(\text{Def2-SV(P)}) = -1401.55157805$

$G(\text{Def2-SV(P)}) = -1401.43905650$

$E(\text{Def2-TZVP}) = -1402.32990322$

3 3

|   |                 |                 |                 |
|---|-----------------|-----------------|-----------------|
| V | -0.000000718176 | -0.000000924618 | -0.000002228106 |
| O | 1.580932683322  | -0.003265161189 | -1.238774996193 |
| O | 0.823172303842  | 1.558243218908  | 0.959936758312  |
| O | -1.580936453772 | 0.003292442933  | 1.238764805553  |
| O | -0.823161037544 | -1.558243003639 | -0.959948567999 |
| O | -1.006794620668 | 1.296326192159  | -1.155435761477 |
| O | 1.006797948900  | -1.296332900441 | 1.155428504369  |
| H | 1.970960155507  | -1.442452512138 | 1.108726060928  |
| H | 1.820480127231  | -0.729429052910 | -1.845611239358 |
| H | 1.618398399720  | 1.519310937544  | 1.525231181247  |
| H | -2.173055327015 | -0.757349907817 | 1.394005334417  |
| H | -0.471146478525 | -2.468954263157 | -0.956448028659 |
| H | -1.970959569380 | 1.442430586524  | -1.108745624546 |
| H | 2.173045052159  | 0.757357354406  | -1.393987046076 |
| H | 0.471165163167  | 2.468959587524  | 0.956438687096  |
| H | -1.820429336593 | 0.729450987559  | 1.845627699535  |
| H | -1.618436089872 | -1.519346388539 | -1.525178693933 |
| H | -0.623457836223 | 1.871655571113  | -1.844541140428 |
| H | 0.623462346713  | -1.871660103893 | 1.844537409332  |

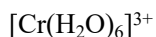

$E(\text{Def2-SV(P)}) = -1501.98179229$

$G(\text{Def2-SV(P)}) = -1501.87136056$

$E(\text{Def2-TZVP}) = -1502.78864689$

3 4

|    |                 |                 |                 |
|----|-----------------|-----------------|-----------------|
| Cr | -0.000018496649 | -0.000008380572 | -0.000002867889 |
|----|-----------------|-----------------|-----------------|

|   |                 |                 |                 |
|---|-----------------|-----------------|-----------------|
| O | 0.826454683020  | -1.427046760033 | -1.076690369239 |
| O | -0.850473090002 | -1.402861617219 | 1.092451404480  |
| O | -0.826516912746 | 1.427066177070  | 1.076631401998  |
| O | 0.850430778486  | 1.402840271373  | -1.092466815249 |
| O | 1.590563261952  | -0.016237296661 | 1.162403150993  |
| O | -1.590598958243 | 0.016201190015  | -1.162407274280 |
| H | -1.668798707455 | -0.470206304851 | -2.005163118880 |
| H | 1.330321103385  | -1.283071103893 | -1.900357801268 |
| H | -1.788128803631 | -1.657050766847 | 0.993008389282  |
| H | -0.573466865902 | 2.366209465879  | 0.990105080040  |
| H | 0.499723496103  | 1.725774225134  | -1.944422085634 |
| H | 1.668750934643  | 0.470068736151  | 2.005203466852  |
| H | 0.573582162010  | -2.366234743513 | -0.990201787849 |
| H | -0.499834935140 | -1.725710934601 | 1.944452232147  |
| H | -1.330011350326 | 1.283153113674  | 1.900531017878  |
| H | 1.788040224219  | 1.657174180060  | -0.992984107676 |
| H | 2.291971898444  | -0.691718108451 | 1.090286473673  |
| H | -2.292011251046 | 0.691687471120  | -1.090363736402 |

[Fe(H<sub>2</sub>O)<sub>6</sub>]<sup>3+</sup>

*E*(Def2-SV(P)) = -1721.16334277

*G*(Def2-SV(P)) = -1721.05654896

*E*(Def2-TZVP) = -1721.98416054

3 6

|    |                 |                 |                 |
|----|-----------------|-----------------|-----------------|
| Fe | -0.000068055920 | 0.000053986346  | 0.000089367004  |
| O  | 1.037879442145  | -1.571330561020 | 0.702479001137  |
| O  | 1.095446233417  | 1.237697745136  | 1.143602186576  |
| O  | -1.038010884309 | 1.571414473525  | -0.702328259659 |
| O  | -1.095346934310 | -1.237622926447 | -1.143637670919 |
| O  | 1.329474124631  | 0.206025467883  | -1.492595756776 |
| O  | -1.329482009891 | -0.205957066771 | 1.492825812200  |
| H  | -1.290269324999 | -0.886593729806 | 2.191883147212  |
| H  | 0.891687586125  | -2.502004376093 | 0.445219664914  |
| H  | 0.872063834691  | 1.508202398590  | 2.054918566926  |
| H  | -1.758396621985 | 1.519496581180  | -1.359615919394 |
| H  | -1.930714035839 | -1.662414368158 | -0.868243312807 |

|   |                 |                 |                 |
|---|-----------------|-----------------|-----------------|
| H | 1.289930565037  | 0.886137617829  | -2.192147708547 |
| H | 1.758410984908  | -1.519408573354 | 1.359610526042  |
| H | 1.930734089755  | 1.662444499769  | 0.867883950300  |
| H | -0.891599643311 | 2.502125593647  | -0.445324541967 |
| H | -0.871594925947 | -1.508154954679 | -2.054848504285 |
| H | 2.105830514724  | -0.369145771795 | -1.634204902679 |
| H | -2.105974871227 | 0.369034005953  | 1.634434340045  |

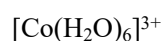

$E(\text{Def2-SV(P)}) = -1840.15558935$

$G(\text{Def2-SV(P)}) = -1840.04677124$

$E(\text{Def2-TZVP}) = -1840.99306444$

3 5

|    |                 |                 |                 |
|----|-----------------|-----------------|-----------------|
| Co | -0.000014427622 | 0.000151980670  | 0.000035349072  |
| O  | -0.427381389260 | 1.092451960986  | -1.598083318806 |
| O  | -1.370298639218 | 0.956390847425  | 1.062692356888  |
| O  | 0.427661310194  | -1.091899483087 | 1.598325786032  |
| O  | 1.370443285020  | -0.956362749854 | -1.062214132805 |
| O  | -1.344223851932 | -1.353742679612 | -0.544124318189 |
| O  | 1.344206336704  | 1.354047418861  | 0.544004667362  |
| H  | 1.316094109174  | 2.297543565645  | 0.293160912243  |
| H  | 0.191042396882  | 1.246087248471  | -2.338332788544 |
| H  | -1.174925249119 | 1.561742674818  | 1.803963012032  |
| H  | 1.204889868735  | -1.677119733253 | 1.685624710285  |
| H  | 2.334840233943  | -0.818478683556 | -0.990666333147 |
| H  | -1.315719309596 | -2.297400679398 | -0.293939682056 |
| H  | -1.205751735381 | 1.675941400908  | -1.686658945797 |
| H  | -2.334691990609 | 0.818391557940  | 0.991455869401  |
| H  | -0.191043562980 | -1.246119699074 | 2.338240053321  |
| H  | 1.175292170023  | -1.561703088399 | -1.803543346986 |
| H  | -2.005811386481 | -1.218650972822 | -1.249931639925 |
| H  | 2.005823608034  | 1.219028628065  | 1.249771988482  |

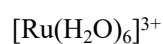

$E(\text{Def2-SV(P)}) = -552.45329177$

$G(\text{Def2-SV(P)}) = -552.33839794$

$E(\text{Def2-TZVP}) = -553.13265534$

3 2

|    |                 |                 |                 |
|----|-----------------|-----------------|-----------------|
| Ru | 0.000013134768  | 0.000005234743  | -0.000015873791 |
| O  | 1.426063679585  | 0.259350180016  | -1.438713668790 |
| O  | 1.519745017563  | -0.858955125152 | 1.110005558188  |
| O  | -1.426109173204 | -0.259464547390 | 1.438615237767  |
| O  | -1.519702992298 | 0.858925369555  | -1.110064425814 |
| O  | 0.483184080945  | 1.862106429058  | 0.695714398504  |
| O  | -0.483141230924 | -1.862103882745 | -0.695689844504 |
| H  | 0.095625137107  | -2.372484288491 | -1.294723395177 |
| H  | 1.251668768833  | 0.173308666183  | -2.395401297368 |
| H  | 1.625388350654  | -1.829248684304 | 1.075803721069  |
| H  | -2.358978653816 | -0.042243269586 | 1.246582594509  |
| H  | -1.692205354429 | 0.564829371688  | -2.024803951875 |
| H  | -0.095639224249 | 2.372479737612  | 1.294704544017  |
| H  | 2.359020670862  | 0.042553257507  | -1.246694351698 |
| H  | 1.692359361919  | -0.564746510861 | 2.024685976699  |
| H  | -1.251719378119 | -0.173280098085 | 2.395298387735  |
| H  | -1.625606100687 | 1.829180505115  | -1.075689612325 |
| H  | 1.407098903302  | 2.159616628023  | 0.803356058745  |
| H  | -1.407058455704 | -2.159709216674 | -0.803092696279 |

$[\text{Co}(\text{NH}_3)_6]^{3+}$

$E(\text{Def2-SV(P)}) = -1721.27123844$

$G(\text{Def2-SV(P)}) = -1721.06074309$

$E(\text{Def2-TZVP}) = -1721.92945932$

3 1

|    |                 |                 |                 |
|----|-----------------|-----------------|-----------------|
| Co | -0.039039321148 | -0.031934969229 | -0.013944293531 |
| N  | 1.349662908716  | 0.695036838358  | 1.204121032490  |
| H  | 2.203686050075  | 0.127770818683  | 1.244994073766  |
| H  | 1.038616549932  | 0.771020047574  | 2.178835155095  |
| H  | 1.666903686429  | 1.636705816175  | 0.948427115981  |
| N  | -0.208063119398 | -1.576576967395 | 1.222223810181  |
| H  | -0.625720951147 | -2.414672031937 | 0.803476707447  |
| H  | -0.780876838062 | -1.379520663446 | 2.050611624620  |
| H  | 0.698237482102  | -1.884254665936 | 1.591699434575  |

|   |                 |                 |                 |
|---|-----------------|-----------------|-----------------|
| N | -1.438567976307 | -0.768206591704 | -1.216411104785 |
| H | -2.331233179429 | -0.265753350448 | -1.156403408706 |
| H | -1.674130400960 | -1.747349207272 | -1.022667770234 |
| H | -1.185966350442 | -0.750888231351 | -2.210361096101 |
| N | -1.453717273509 | 0.946833516847  | 0.976597137645  |
| H | -2.225060351472 | 0.342736016192  | 1.283244701022  |
| H | -1.897836960754 | 1.689449164987  | 0.425289431026  |
| H | -1.120749663851 | 1.413996086947  | 1.827638850885  |
| N | 0.195106319463  | 1.536090975435  | -1.208007679133 |
| H | -0.517016240962 | 1.613393714541  | -1.942877096909 |
| H | 1.094006666374  | 1.538917488758  | -1.703963250713 |
| H | 0.161113237842  | 2.430579029618  | -0.706083603039 |
| N | 1.333867929646  | -1.018203328590 | -1.051454522600 |
| H | 1.373739934433  | -2.017054115358 | -0.819958536655 |
| H | 2.290157032980  | -0.670991706755 | -0.917805241973 |
| H | 1.177660693040  | -0.986642940789 | -2.065547105792 |

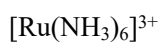

$E(\text{Def2-SV(P)}) = -433.55132867$

$G(\text{Def2-SV(P)}) = -433.34621320$

$E(\text{Def2-TZVP}) = -434.05161202$

3 2

|    |                 |                 |                 |
|----|-----------------|-----------------|-----------------|
| Ru | -0.010921595185 | -0.031620917362 | -0.034512243692 |
| N  | 1.618631182376  | -0.121950413188 | 1.346117063025  |
| H  | 1.338176033695  | 0.098939460749  | 2.307707845236  |
| H  | 2.374192152428  | 0.537589773333  | 1.129636964828  |
| H  | 2.058334787036  | -1.047669641337 | 1.391684109117  |
| N  | -0.964315454513 | -1.591259866532 | 1.071630106387  |
| H  | -0.629934954894 | -1.672222531277 | 2.037998900355  |
| H  | -0.842596194602 | -2.519740447965 | 0.653855166650  |
| H  | -1.980597425318 | -1.464901407753 | 1.142964564898  |
| N  | -1.667984463080 | 0.005495588196  | -1.382204013728 |
| H  | -1.484502395464 | 0.521179927471  | -2.249466935010 |
| H  | -2.500036832942 | 0.451453011819  | -0.979096928545 |
| H  | -1.969897382721 | -0.931714429291 | -1.670323108647 |
| N  | -0.909674343178 | 1.464289498587  | 1.201242766658  |

|   |                 |                 |                 |
|---|-----------------|-----------------|-----------------|
| H | -1.574666904999 | 1.086601664808  | 1.885591328571  |
| H | -1.428313702243 | 2.173471567248  | 0.671553470890  |
| H | -0.217732011844 | 1.981801595337  | 1.754125163393  |
| N | 0.916151910352  | 1.545677800543  | -1.135241240642 |
| H | 0.872368637188  | 2.449599950581  | -0.652973697277 |
| H | 0.496245575728  | 1.698107795386  | -2.057707172902 |
| H | 1.913020726507  | 1.385862954916  | -1.321609227331 |
| N | 0.946147760970  | -1.469041267477 | -1.288267339783 |
| H | 0.823015336568  | -2.439045418019 | -0.979439672286 |
| H | 1.962920709014  | -1.331912401832 | -1.336193207818 |
| H | 0.622114362905  | -1.434783098150 | -2.260852783522 |

[Ru(NH<sub>3</sub>)<sub>5</sub>py]<sup>3+</sup>

*E*(Def2-SV(P)) = -625.07443096

*G*(Def2-SV(P)) = -624.82057688

*E*(Def2-TZVP) = -625.77056772

3 2

|    |                 |                 |                 |
|----|-----------------|-----------------|-----------------|
| Ru | -0.891071808380 | -0.006525875679 | 0.013783501321  |
| N  | -0.925866633013 | 1.586381026401  | -1.411890418781 |
| H  | -1.681103328309 | 1.499697742605  | -2.100794045070 |
| H  | -0.064390019131 | 1.630061879199  | -1.968277818687 |
| H  | -1.052446869164 | 2.517449407308  | -1.001737834337 |
| N  | -0.905341586779 | 1.416630194905  | 1.609730295818  |
| H  | -1.593795285519 | 1.200484000804  | 2.339012034946  |
| H  | -1.115023439356 | 2.377770891509  | 1.320648244296  |
| H  | -0.005872767946 | 1.458371021425  | 2.102972560630  |
| N  | -0.891927569729 | -1.590768033796 | 1.449674971095  |
| H  | -1.055660270572 | -2.523792349005 | 1.056765141006  |
| H  | -1.605996935277 | -1.476703643823 | 2.177772755941  |
| H  | -0.003544720561 | -1.648140157758 | 1.961077527103  |
| N  | -3.029260941241 | -0.029542057426 | 0.033329568650  |
| H  | -3.431466484158 | 0.007087561413  | -0.910081045245 |
| H  | -3.444518162235 | 0.764686295228  | 0.532834031835  |
| H  | -3.419823364501 | -0.879329070392 | 0.455510462364  |
| N  | -0.929237313022 | -1.426955348378 | -1.583831193160 |
| H  | -0.031166350158 | -1.484626883086 | -2.077635235924 |



|   |                 |                 |                 |
|---|-----------------|-----------------|-----------------|
| H | -1.612877789138 | -1.194139128958 | -2.312794902431 |
| H | -1.162927815822 | -2.382939547108 | -1.296510124451 |
| C | 3.998698024258  | -0.010740243429 | -0.016215586504 |
| C | 3.292611575789  | 1.189897648029  | 0.019924403192  |
| C | 1.907844606770  | 1.153009623833  | 0.023316046718  |
| N | 1.214654526808  | -0.003363044049 | -0.006827291634 |
| C | 1.901887366205  | -1.163362597191 | -0.043069766281 |
| C | 3.286250085868  | -1.207777497722 | -0.049060865795 |
| H | 5.091204007360  | -0.013658526350 | -0.018363481825 |
| H | 3.801906015550  | 2.154349977489  | 0.046372259483  |
| H | 1.337122569474  | 2.082593320336  | 0.051358406726  |
| H | 1.326050161402  | -2.089992124399 | -0.066733603886 |
| H | 3.790150199901  | -2.174996063527 | -0.078137274600 |

[Co(en)<sub>3</sub>]<sup>3+</sup>

*E*(Def2-SV(P)) = -1953.27969345

*G*(Def2-SV(P)) = -1952.95604309

*E*(Def2-TZVP) = -1954.16123756

3 1

|    |                 |                 |                 |
|----|-----------------|-----------------|-----------------|
| Co | 0.004768655305  | 0.001303462327  | 0.007297407188  |
| N  | 1.229685065693  | 1.138681629088  | 1.089042267389  |
| N  | -0.271379885743 | 1.647938624257  | -1.073865932785 |
| N  | 1.506961967658  | -0.615237791826 | -1.138691411562 |
| N  | 0.431777725557  | -1.586141572249 | 1.120158257372  |
| N  | -1.570408504847 | 0.429968118187  | 1.144729557429  |
| N  | -1.296763474647 | -1.009259247419 | -1.102678997030 |
| C  | 1.524451213453  | 2.394760684963  | 0.351430126248  |
| C  | 0.249399374469  | 2.825666756078  | -0.333233360817 |
| C  | 1.844446398621  | -2.022663899945 | -0.798580644038 |
| C  | 1.737221638982  | -2.163783557835 | 0.702636402661  |
| C  | -2.713687844621 | -0.442785268843 | 0.768468599345  |
| C  | -2.681897797860 | -0.621093922997 | -0.731836854455 |
| H  | 1.309766465909  | -0.549284785215 | -2.141949532882 |
| H  | 2.339355835309  | -0.032524304210 | -1.008467595561 |
| H  | -0.294615866851 | -2.305876060385 | 1.048878592096  |
| H  | 0.464240655409  | -1.368275976164 | 2.120863889122  |

|   |                 |                 |                 |
|---|-----------------|-----------------|-----------------|
| H | 0.228763324778  | 1.576028322488  | -1.965207507814 |
| H | -1.244636782207 | 1.817738201569  | -1.346383738940 |
| H | 2.109832028734  | 0.681822348765  | 1.346649516507  |
| H | 0.803214536466  | 1.375428203361  | 1.990914573056  |
| H | -1.847370475199 | 1.410371409845  | 1.036045248497  |
| H | -1.394523901480 | 0.330845481265  | 2.149129462690  |
| H | -1.190274351534 | -2.020241442762 | -0.972146823372 |
| H | -1.161823412836 | -0.871411204809 | -2.109517638888 |
| H | -3.400577954454 | -1.384193375713 | -1.063964430473 |
| H | -2.931576324747 | 0.314871317740  | -1.252767605741 |
| H | -3.663275064836 | -0.002500913830 | 1.105264843171  |
| H | -2.593348419483 | -1.407764393855 | 1.283259971297  |
| H | 2.313741865574  | 2.190325633206  | -0.387370360129 |
| H | 1.902463936060  | 3.168258156173  | 1.035319160337  |
| H | -0.505009988410 | 3.143406209818  | 0.402123778901  |
| H | 0.419969195400  | 3.668837486106  | -1.017959940930 |
| H | 2.540136213946  | -1.606054917683 | 1.207753085824  |
| H | 1.815325513099  | -3.213774109996 | 1.019245876981  |
| H | 1.135650050359  | -2.684549332437 | -1.318757581999 |
| H | 2.853451348068  | -2.275337250000 | -1.155460817187 |

[Ru(en)<sub>3</sub>]<sup>3+</sup>

*E*(Def2-SV(P)) = -665.55523862

*G*(Def2-SV(P)) = -665.23579066

*E*(Def2-TZVP) = -666.27945288

3 2

|    |                 |                 |                 |
|----|-----------------|-----------------|-----------------|
| Ru | -0.002477139515 | -0.006755221349 | -0.012409173744 |
| N  | -1.097905674956 | -1.478470111362 | -1.111508378302 |
| N  | -1.820889215130 | -0.000290355077 | 1.120336668463  |
| N  | 0.926730056829  | -1.559077978025 | 1.126297090549  |
| N  | 1.799092542236  | -0.235306581907 | -1.145646931912 |
| N  | -0.740925613440 | 1.682288117192  | -1.109841462699 |
| N  | 0.930127826740  | 1.563296548094  | 1.097653946941  |
| C  | -2.537135488786 | -1.400428451697 | -0.742895953628 |
| C  | -2.643240333351 | -1.184555119424 | 0.751034497641  |
| C  | 2.367759023824  | -1.639632474963 | 0.765010482633  |

|   |                 |                 |                 |
|---|-----------------|-----------------|-----------------|
| C | 2.494752532402  | -1.485386915305 | -0.734604895928 |
| C | 0.033748902244  | 2.895968493644  | -0.734430632612 |
| C | 0.292742243999  | 2.863740062839  | 0.755971246724  |
| H | 0.841578659398  | -1.399873780967 | 2.136004902377  |
| H | 0.487938130537  | -2.474196144663 | 0.983261658778  |
| H | 2.433372972210  | 0.561093955910  | -1.032275530623 |
| H | 1.620570482527  | -0.266683035073 | -2.155016391240 |
| H | -1.650458900892 | -0.012341787486 | 2.131636125033  |
| H | -2.368946549033 | 0.852364155538  | 0.973029973813  |
| H | -0.751657068101 | -2.428340554501 | -0.946906861464 |
| H | -1.004122752056 | -1.354259806428 | -2.125310972276 |
| H | -1.737064606396 | 1.850779915905  | -0.941913610223 |
| H | -0.683044489442 | 1.548508583748  | -2.125094081941 |
| H | 1.937521744117  | 1.621197214811  | 0.919326294172  |
| H | 0.866026651433  | 1.412878694204  | 2.110089140310  |
| H | 0.937630023130  | 3.699905124558  | 1.063821520102  |
| H | -0.648455506644 | 2.940515087716  | 1.321110377002  |
| H | -0.515185815933 | 3.805441587503  | -1.020021394702 |
| H | 0.978482672999  | 2.883694262838  | -1.297932022994 |
| H | -3.063387037596 | -2.316724588037 | -1.048477720570 |
| H | -2.981961076180 | -0.557170133648 | -1.292929769325 |
| H | -3.689690599528 | -1.033294345869 | 1.054032996466  |
| H | -2.257128798304 | -2.053893112273 | 1.303545480344  |
| H | 2.016545174075  | -2.328421973883 | -1.254924086275 |
| H | 3.550254094186  | -1.455940587107 | -1.042581843206 |
| H | 2.896437377548  | -0.830908426695 | 1.291891392468  |
| H | 2.795520277892  | -2.595126774293 | 1.102618769760  |

[Fe(bpy)<sub>3</sub>]<sup>3+</sup>

$E(\text{Def2-SV(P)}) = -2747.82188920$

$G(\text{Def2-SV(P)}) = -2747.38176418$

$E(\text{Def2-TZVP}) = -2749.60294216$

3 2

|    |                |                |                 |
|----|----------------|----------------|-----------------|
| Fe | 0.006046074133 | 0.005225288415 | 0.004324106429  |
| C  | 4.118603387767 | 0.728187356143 | -2.240210063942 |
| C  | 0.122395598837 | 2.156615710714 | 2.039103690106  |

|   |                 |                 |                 |
|---|-----------------|-----------------|-----------------|
| C | 0.677535968143  | 3.262887797649  | 2.668164716523  |
| C | 1.897846296191  | 3.749318787749  | 2.211054051758  |
| C | 2.526374349837  | 3.115075386848  | 1.142164468533  |
| C | 1.916586499177  | 2.010147423831  | 0.559711386464  |
| C | 2.473775362163  | 1.251955676028  | -0.575491225402 |
| C | 3.701301367736  | 1.517495689613  | -1.171233135964 |
| C | 3.300079553265  | -0.305833897409 | -2.682710688500 |
| C | 2.087305477147  | -0.518220398997 | -2.040974367551 |
| H | -0.829831192301 | 1.743835969995  | 2.374003171683  |
| H | 0.150595492397  | 3.727443257841  | 3.502635963286  |
| H | 3.480816181389  | 3.485535765404  | 0.768954367125  |
| H | 4.331744122788  | 2.329637367652  | -0.809745505946 |
| H | 3.587010421653  | -0.948501911199 | -3.516048786047 |
| H | 1.417070328832  | -1.315336964388 | -2.364396490337 |
| N | 0.730734313922  | 1.547008010627  | 1.014701062836  |
| N | 1.685972970159  | 0.246417607110  | -1.018339916702 |
| C | -1.498087909556 | -1.542423935100 | -2.027531439954 |
| C | -1.938941241920 | -2.701922819773 | -2.651229362022 |
| C | -1.470389806966 | -3.928110722419 | -2.191044401899 |
| C | -0.573961351632 | -3.958363475357 | -1.125535903771 |
| C | -0.169482531152 | -2.759569150594 | -0.549661268963 |
| C | 0.778717430375  | -2.651738583250 | 0.574464106579  |
| C | 1.431653018717  | -3.730709516453 | 1.159475864891  |
| C | 2.312684636473  | -3.498207167329 | 2.212893879318  |
| C | 2.518489094685  | -2.194572605073 | 2.652305463036  |
| C | 1.835284447819  | -1.163040907967 | 2.022530583430  |
| C | -0.601168578560 | 2.074092234313  | -2.030345817316 |
| C | -1.402769724302 | 3.007003417717  | -2.674393321414 |
| C | -2.711642044463 | 3.179584648452  | -2.236275585822 |
| C | -3.178180560993 | 2.417171988447  | -1.168114522436 |
| C | -2.322849799751 | 1.499669678618  | -0.569123933927 |
| C | -2.690715495758 | 0.635958702594  | 0.567857055526  |
| C | -3.952190032217 | 0.598334583075  | 1.150657231373  |
| C | -4.175775125389 | -0.259410577986 | 2.224872487360  |
| C | -3.133690878128 | -1.056509473441 | 2.686848810623  |
| C | -1.899800050080 | -0.972470228895 | 2.056113063696  |

|   |                 |                 |                 |
|---|-----------------|-----------------|-----------------|
| H | -1.838640832564 | -0.563440496180 | -2.366326161285 |
| H | -2.639505297265 | -2.630704788619 | -3.484285381051 |
| H | -0.198784039597 | -4.910730017183 | -0.751718123553 |
| H | 1.262752062353  | -4.745664544450 | 0.800669595208  |
| H | 3.198554517727  | -1.965710906573 | 3.473875940483  |
| H | 1.966108578960  | -0.129479724302 | 2.344469666617  |
| H | 0.427166290022  | 1.907005055639  | -2.351929005977 |
| H | -0.995123392832 | 3.582422025223  | -3.506582130549 |
| H | -4.199453610382 | 2.542909812448  | -0.809540203573 |
| H | -4.758659309047 | 1.227248512588  | 0.774640681390  |
| H | -3.262429221462 | -1.741424088724 | 3.525962702740  |
| H | -1.058389028970 | -1.578334338765 | 2.394656996671  |
| N | -0.634053824725 | -1.574815463307 | -1.005910775127 |
| N | 0.985852109534  | -1.390138536306 | 1.013534593463  |
| N | -1.054533313263 | 1.337907461651  | -1.008656608743 |
| N | -1.686731496288 | -0.144663129463 | 1.026175225942  |
| H | 5.079374781366  | 0.923197019884  | -2.721133979920 |
| H | 2.362659062940  | 4.619067768240  | 2.680000567737  |
| H | -5.160716498062 | -0.301391989721 | 2.694498269033  |
| H | -3.370738152641 | 3.904018860382  | -2.719198313607 |
| H | -1.797781194194 | -4.860427129141 | -2.655844604117 |
| H | 2.834069733361  | -4.334255271282 | 2.683617514493  |

[Co(bpy)<sub>3</sub>]<sup>3+</sup>

$E(\text{Def2-SV(P)}) = -2866.88356163$

$G(\text{Def2-SV(P)}) = -2866.44192421$

$E(\text{Def2-TZVP}) = -2868.68092148$

3 1

|    |                 |                 |                 |
|----|-----------------|-----------------|-----------------|
| Co | -0.001497542019 | -0.005442556684 | -0.003108999360 |
| C  | 0.102372875412  | 4.156623478490  | 2.195860834509  |
| C  | 2.060806013210  | 0.378232688369  | -2.067913975925 |
| C  | 3.066364528864  | 1.084735379328  | -2.714701155786 |
| C  | 3.373866931487  | 2.366774145552  | -2.272813471551 |
| C  | 2.667250384999  | 2.903241166519  | -1.199070197460 |
| C  | 1.672129366650  | 2.141606438287  | -0.597803563042 |
| C  | 0.849607957543  | 2.591476792447  | 0.539388219968  |

|   |                 |                 |                 |
|---|-----------------|-----------------|-----------------|
| C | 0.934352528322  | 3.850519489596  | 1.121615717620  |
| C | -0.790809070875 | 3.195991675805  | 2.657522127935  |
| C | -0.822992569638 | 1.956960864324  | 2.030808502556  |
| H | 1.790930446758  | -0.626223391794 | -2.393806226444 |
| H | 3.591382306578  | 0.623502207077  | -3.552194782178 |
| H | 2.895701324599  | 3.905499046358  | -0.837181749303 |
| H | 1.638509116731  | 4.591359848239  | 0.743850668344  |
| H | -1.460627770030 | 3.390079938259  | 3.496243206662  |
| H | -1.503070896432 | 1.177552995683  | 2.374170703074  |
| N | 1.382524681719  | 0.897587271560  | -1.039116993769 |
| N | -0.020026741645 | 1.666024809449  | 1.001495248013  |
| C | -1.277838081225 | -1.659134914275 | 2.071233649408  |
| C | -2.363290519512 | -2.235079320652 | 2.718512262057  |
| C | -3.645107107999 | -1.940914613735 | 2.266875240967  |
| C | -3.802848872336 | -1.081727488305 | 1.182075952043  |
| C | -2.673361822261 | -0.540636806936 | 0.579448685785  |
| C | -2.701569949571 | 0.376411822392  | -0.574102555392 |
| C | -3.861871670076 | 0.862219334331  | -1.165345400267 |
| C | -3.756574174039 | 1.717956224444  | -2.259219521050 |
| C | -2.495230836540 | 2.061958679132  | -2.732652886603 |
| C | -1.376853529011 | 1.542061888031  | -2.094136581089 |
| C | 2.080189189808  | -0.231859298647 | 2.066379473596  |
| C | 3.136434548199  | -0.860368183067 | 2.713021466298  |
| C | 3.539675449361  | -2.115963133073 | 2.271972111082  |
| C | 2.875840500445  | -2.705090724031 | 1.198563507948  |
| C | 1.826685295841  | -2.020805263583 | 0.596259385035  |
| C | 1.040155224118  | -2.532424701130 | -0.540674744325 |
| C | 1.215805777229  | -3.783832156170 | -1.119007090365 |
| C | 0.406802965238  | -4.153562423221 | -2.190876409445 |
| C | -0.554602529037 | -3.262190907399 | -2.654285109715 |
| C | -0.676628940590 | -2.027039454773 | -2.031099410280 |
| H | -0.260334356318 | -1.862042649118 | 2.404937783672  |
| H | -2.190920679653 | -2.901632239541 | 3.564539806552  |
| H | -4.799621568495 | -0.841710894292 | 0.812933707751  |
| H | -4.842188908653 | 0.581899289255  | -0.780780380734 |
| H | -2.363759504003 | 2.726053643063  | -3.587894348220 |

|   |                 |                 |                 |
|---|-----------------|-----------------|-----------------|
| H | -0.373976677953 | 1.786884011170  | -2.443256550897 |
| H | 1.733442640116  | 0.748836390735  | 2.392306428502  |
| H | 3.625555968084  | -0.360984773091 | 3.550358384997  |
| H | 3.179670045243  | -3.687413148315 | 0.837251057205  |
| H | 1.972149650649  | -4.470359199733 | -0.739467825898 |
| H | -1.210100585003 | -3.507741524665 | -3.490830398987 |
| H | -1.414449329034 | -1.302013516200 | -2.374373330781 |
| N | -1.433532584744 | -0.832251542062 | 1.031555694355  |
| N | -1.482091810797 | 0.721502179485  | -1.043325277439 |
| N | 1.443271142420  | -0.802286641900 | 1.037688173921  |
| N | 0.104667554788  | -1.674444334821 | -1.004526818183 |
| H | 0.155393443364  | 5.141164095899  | 2.665118855333  |
| H | 4.159118600631  | 2.950544721314  | -2.757424186924 |
| H | 0.530545239961  | -5.133316020430 | -2.656768821903 |
| H | 4.366533619789  | -2.638855320972 | 2.756961230926  |
| H | -4.521577303297 | -2.375468262676 | 2.751920948891  |
| H | -4.657559592531 | 2.110504204204  | -2.735076482419 |

[Ru(bpy)<sub>3</sub>]<sup>3+</sup>

*E*(Def2-SV(P)) = -1579.15775736

*G*(Def2-SV(P)) = -1578.71940928

*E*(Def2-TZVP) = -1580.80258700

3 2

|    |                 |                 |                 |
|----|-----------------|-----------------|-----------------|
| Ru | -0.003716769593 | -0.003592363058 | 0.000701362438  |
| C  | -1.831263851366 | 3.923459494443  | 2.177307492818  |
| C  | 1.765549372639  | 1.456478370704  | -2.007835259347 |
| C  | 2.351475673087  | 2.552351094100  | -2.625340661292 |
| C  | 2.015107642857  | 3.826629146326  | -2.179646755201 |
| C  | 1.105771728294  | 3.966616130958  | -1.134387780621 |
| C  | 0.551739207200  | 2.828293795491  | -0.557822211892 |
| C  | -0.417398773829 | 2.853221477070  | 0.557463586940  |
| C  | -0.911432030262 | 4.017977032883  | 1.136097104409  |
| C  | -2.239331526799 | 2.667780215771  | 2.615971152216  |
| C  | -1.710450217406 | 1.544052886442  | 1.997075278707  |
| H  | 1.995540375257  | 0.438657967948  | -2.327275350176 |
| H  | 3.058678900130  | 2.397045082815  | -3.441085024526 |

|   |                 |                 |                 |
|---|-----------------|-----------------|-----------------|
| H | 0.836684931344  | 4.960021937638  | -0.776865826506 |
| H | -0.587953274572 | 4.996770692169  | 0.783189148024  |
| H | -2.958345223856 | 2.548166394219  | 3.427381945762  |
| H | -1.996280758863 | 0.538749187361  | 2.311083522370  |
| N | 0.887520244054  | 1.594716018680  | -1.005517841905 |
| N | -0.820673264553 | 1.638462757343  | 1.000189555978  |
| C | -0.491689671712 | -2.234057404352 | 2.018346501955  |
| C | -1.197549832886 | -3.253900052822 | 2.640750146343  |
| C | -2.481902809038 | -3.545343743382 | 2.192004402431  |
| C | -3.021331223607 | -2.809756563010 | 1.139741616183  |
| C | -2.264056609714 | -1.796968961927 | 0.560349796780  |
| C | -2.728365668555 | -0.953281758481 | -0.560072339474 |
| C | -3.988793707453 | -1.052124718775 | -1.140202829354 |
| C | -4.323719431027 | -0.200261238212 | -2.189641653385 |
| C | -3.392973657663 | 0.733545357388  | -2.634161089315 |
| C | -2.153771111343 | 0.784535111432  | -2.011586526094 |
| C | 2.151927365522  | 0.667156113729  | 2.046205917841  |
| C | 3.382965884224  | 0.560672795339  | 2.678026157167  |
| C | 4.286973852735  | -0.392292385793 | 2.219170370765  |
| C | 3.933420501130  | -1.209676447999 | 1.148504956468  |
| C | 2.681925421800  | -1.056812666403 | 0.561189937613  |
| C | 2.195059657804  | -1.866845419959 | -0.574266605624 |
| C | 2.924432107416  | -2.888598170399 | -1.173308167899 |
| C | 2.361349894970  | -3.594920570437 | -2.233335604808 |
| C | 1.081002915110  | -3.267490416469 | -2.668493312806 |
| C | 0.404388947404  | -2.239122092585 | -2.027858228583 |
| H | 0.516478762500  | -1.967290794635 | 2.339810321812  |
| H | -0.737134733437 | -3.803913835971 | 3.462480031618  |
| H | -4.025185100128 | -3.030870991479 | 0.778121575314  |
| H | -4.711143233321 | -1.784372628695 | -0.780756175307 |
| H | -3.613727181880 | 1.419995871587  | -3.452583211449 |
| H | -1.390867549036 | 1.497811569844  | -2.328159298373 |
| H | 1.409559677994  | 1.397217129923  | 2.373043334930  |
| H | 3.618501540955  | 1.219790093110  | 3.514578995334  |
| H | 4.633471176671  | -1.958671706161 | 0.779525168972  |
| H | 3.924726660119  | -3.139161769856 | -0.820885591940 |



|   |                 |                 |                 |
|---|-----------------|-----------------|-----------------|
| H | 0.601942784875  | -3.795225820465 | -3.494152717107 |
| H | -0.599140382583 | -1.943363391070 | -2.338690398915 |
| N | -1.015060580351 | -1.525712757170 | 1.008867199880  |
| N | -1.832819380852 | -0.040988609982 | -1.006644892067 |
| N | 1.813867623697  | -0.123866005007 | 1.019474735849  |
| N | 0.951851104273  | -1.556574704670 | -1.013501771058 |
| H | -2.226299113258 | 4.830560648894  | 2.639455217057  |
| H | 2.456889681727  | 4.712873645044  | -2.639925397049 |
| H | 2.923935976951  | -4.398542478046 | -2.713055379674 |
| H | 5.266152129474  | -0.503495680608 | 2.689596877447  |
| H | -3.066286052593 | -4.342776123264 | 2.655690811637  |
| H | -5.309856251773 | -0.268589209222 | -2.653697040393 |

[V(H<sub>2</sub>O)<sub>6</sub>]<sup>2+</sup>

*E*(Def2-SV(P)) = -1401.76024677

*G*(Def2-SV(P)) = -1401.65649109

*E*(Def2-TZVP) = -1402.53907882

2 4

|   |                 |                 |                 |
|---|-----------------|-----------------|-----------------|
| V | -0.009483051014 | -0.017714094034 | 0.010551185517  |
| O | -0.008831344580 | -2.116568462797 | -0.397030411124 |
| O | 1.527017234098  | -0.208094709746 | 1.480108982820  |
| O | 0.080512140750  | 2.090213573514  | 0.318732874646  |
| O | -1.542101739423 | 0.311111412510  | -1.437050492490 |
| O | 1.555654481253  | 0.190119934985  | -1.422971257061 |
| O | -1.590354386945 | -0.229000064553 | 1.434418023245  |
| H | -1.778897093440 | -1.084026320169 | 1.853898205845  |
| H | -0.767453010069 | -2.559179486088 | -0.810446171429 |
| H | 1.404826285763  | -0.664371544324 | 2.327880037303  |
| H | -0.653445548836 | 2.674150917515  | 0.069272402778  |
| H | -2.460470847710 | 0.087671735599  | -1.215193144965 |
| H | 1.730015254768  | 1.052354689050  | -1.833522558170 |
| H | 0.412097119384  | -2.757780844554 | 0.197883170877  |
| H | 2.435309779103  | -0.379546851184 | 1.182646324103  |
| H | 0.492966373694  | 2.455889993152  | 1.117643617637  |
| H | -1.423715549826 | 0.161272265489  | -2.388604551169 |
| H | 1.700754891849  | -0.492611091638 | -2.097694150736 |

H -1.773344572545 0.461018988090 2.092520562944

[Cr(H<sub>2</sub>O)<sub>6</sub>]<sup>2+</sup>

*E*(Def2-SV(P)) = -1502.18487173

*G*(Def2-SV(P)) = -1502.08009592

*E*(Def2-TZVP) = -1502.98439553

2 5

|    |                 |                 |                 |
|----|-----------------|-----------------|-----------------|
| Cr | -0.007533862192 | -0.020045596470 | -0.039202418370 |
| O  | -1.009396779682 | 0.896499610139  | 1.533120693487  |
| O  | 0.809889346167  | 1.761310592131  | -0.770454260945 |
| O  | 0.994276909139  | -0.936487931612 | -1.611729478723 |
| O  | -0.825136927131 | -1.801275953999 | 0.692076434418  |
| O  | 2.189265466547  | 0.400421227316  | 0.969119129599  |
| O  | -2.204142477610 | -0.442646712027 | -1.049064962893 |
| H  | -2.900800780268 | 0.181917892867  | -0.790132102762 |
| H  | -1.300260109008 | 0.322001450647  | 2.261455814521  |
| H  | 0.332083254034  | 2.597424929551  | -0.892796801752 |
| H  | 0.730250148342  | -1.791699712440 | -1.989260461583 |
| H  | -1.625006897296 | -1.956091101900 | 0.150509800321  |
| H  | 2.885042615077  | -0.224717491323 | 0.709108689080  |
| H  | -0.744595304881 | 1.751172487285  | 1.911331689365  |
| H  | 1.610410035781  | 1.915627336881  | -0.229758050361 |
| H  | 1.284239117736  | -0.362183800067 | -2.340564417643 |
| H  | -0.347148457542 | -2.637125489102 | 0.815434587338  |
| H  | 2.232996412213  | 0.469624415574  | 1.936437287735  |
| H  | -2.246818484127 | -0.512415944296 | -2.016373775861 |

[Fe(H<sub>2</sub>O)<sub>6</sub>]<sup>2+</sup>

*E*(Def2-SV(P)) = -1721.41250616

*G*(Def2-SV(P)) = -1721.31131787

*E*(Def2-TZVP) = -1722.23747852

2 5

|    |                 |                 |                 |
|----|-----------------|-----------------|-----------------|
| Fe | 0.001712187692  | 0.030841357059  | 0.015303509437  |
| O  | -1.645798949710 | 0.730608793716  | -1.128565786625 |
| O  | -0.202740826049 | -1.908835347583 | -0.834718238099 |
| O  | 1.649142252792  | -0.669191650701 | 1.159207717217  |

|   |                 |                 |                 |
|---|-----------------|-----------------|-----------------|
| O | 0.206400235407  | 1.970577752793  | 0.865069494394  |
| O | 1.358182503882  | 0.542514360351  | -1.526066674228 |
| O | -1.354578285816 | -0.480945799214 | 1.556795980755  |
| H | -2.311603380868 | -0.389219294455 | 1.420532309927  |
| H | -2.012159005498 | 1.617237725674  | -0.980023284514 |
| H | -1.062373642365 | -2.348808708930 | -0.936315999571 |
| H | 1.791476670659  | -0.447200726608 | 2.093281104270  |
| H | -0.317387175986 | 2.172491500414  | 1.657704452348  |
| H | 2.315177497339  | 0.450634603319  | -1.389659737183 |
| H | -1.787902136201 | 0.508934836566  | -2.062772941567 |
| H | 0.321177764288  | -2.110456370701 | -1.627334725302 |
| H | 2.014806319445  | -1.556185819996 | 1.011082039566  |
| H | 1.066034317834  | 2.410668177941  | 0.966332835532  |
| H | 1.217724273378  | 1.284273749612  | -2.136468361432 |
| H | -1.213903692694 | -1.222684521737 | 2.167188653376  |

[Co(H<sub>2</sub>O)<sub>6</sub>]<sup>2+</sup>

*E*(Def2-SV(P)) = -1840.45625965

*G*(Def2-SV(P)) = -1840.35244690

*E*(Def2-TZVP) = -1841.29835455

2 4

|    |                 |                 |                 |
|----|-----------------|-----------------|-----------------|
| Co | 0.004614989805  | 0.046279633442  | -0.036584331338 |
| O  | -1.331871477961 | 0.067570726730  | -1.635443341706 |
| O  | 0.977083976980  | -1.457683795656 | -1.134038062028 |
| O  | 1.427092334216  | 0.063417526508  | 1.486506416710  |
| O  | -1.042802778749 | 1.560636844663  | 0.932358489073  |
| O  | 1.294171326617  | 1.324532960995  | -1.082473716509 |
| O  | -1.261500091717 | -1.277906485375 | 0.985961019808  |
| H  | -1.762473133171 | -1.959094214857 | 0.508459288574  |
| H  | -1.188012856387 | -0.593729294477 | -2.332277923753 |
| H  | 0.973441470331  | -2.393237611826 | -0.874948803577 |
| H  | 1.231106608378  | 0.224419195606  | 2.423264239158  |
| H  | -1.777119155697 | 1.302209902747  | 1.512950943643  |
| H  | 0.967385731562  | 1.786064749120  | -1.872104158898 |
| H  | -2.288837816293 | 0.195780899168  | -1.535367980693 |
| H  | 1.856481072636  | -1.250984183765 | -1.490640478966 |

|   |                 |                 |                 |
|---|-----------------|-----------------|-----------------|
| H | 2.266601620857  | -0.421041332506 | 1.434902084604  |
| H | -0.612577104176 | 2.337174845636  | 1.324834505272  |
| H | 1.852821182236  | 1.946273455076  | -0.588559901778 |
| H | -1.006050516955 | -1.653832565494 | 1.844197500056  |

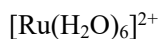

$E(\text{Def2-SV(P)}) = -552.68239320$

$G(\text{Def2-SV(P)}) = -552.56978285$

$E(\text{Def2-TZVP}) = -553.36027291$

2 1

|    |                 |                 |                 |
|----|-----------------|-----------------|-----------------|
| Ru | -0.000004304091 | -0.000022888024 | -0.000035853048 |
| O  | -1.310847451856 | 1.565158966681  | 0.624584448420  |
| O  | -1.384777877332 | -0.239683605374 | -1.609501925893 |
| O  | 1.310826214147  | -1.565221250279 | -0.624682325157 |
| O  | 1.384795100255  | 0.239673691866  | 1.609381863926  |
| O  | 1.342231305995  | 1.278396057224  | -1.060696242885 |
| O  | -1.342233488691 | -1.278406421540 | 1.060671993004  |
| H  | -1.928838929656 | -1.781492035143 | 0.469224421144  |
| H  | -0.916910185437 | 2.427971380777  | 0.836991673424  |
| H  | -1.958100462391 | 0.537694438455  | -1.728651141441 |
| H  | 1.867792531121  | -1.310687024933 | -1.380999116917 |
| H  | 1.957997433071  | -0.537738130055 | 1.728803227971  |
| H  | 1.929115867689  | 1.781043323299  | -0.469136488366 |
| H  | -1.867959069208 | 1.310531173051  | 1.380779822960  |
| H  | -1.026875906114 | -0.467686002809 | -2.484010612410 |
| H  | 0.916876754420  | -2.428071525143 | -0.836905190584 |
| H  | 1.027065219177  | 0.468148984659  | 2.483815605805  |
| H  | 0.962240976871  | 1.911963485747  | -1.692148351334 |
| H  | -0.962310647133 | -1.911537096491 | 1.692571399361  |

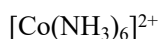

$E(\text{Def2-SV(P)}) = -1721.45672100$

$G(\text{Def2-SV(P)}) = -1721.26754069$

$E(\text{Def2-TZVP}) = -1722.12019000$

2 4

|    |                 |                |                |
|----|-----------------|----------------|----------------|
| Co | -0.004203599558 | 0.008610248212 | 0.003543233768 |
|----|-----------------|----------------|----------------|

|   |                 |                 |                 |
|---|-----------------|-----------------|-----------------|
| N | 1.118954556260  | -1.258047588373 | -1.406973855238 |
| H | 2.097484118322  | -0.969298936285 | -1.490028484210 |
| H | 0.735991409995  | -1.237172059587 | -2.355921264627 |
| H | 1.140762433692  | -2.244864369484 | -1.135657066812 |
| N | 1.712275197410  | -0.072472897030 | 1.376360193040  |
| H | 2.515972534123  | 0.479166029695  | 1.064552365685  |
| H | 2.056457180724  | -1.031250739541 | 1.482042844703  |
| H | 1.492136692195  | 0.251852210977  | 2.321810666829  |
| N | -1.042963832495 | 1.338193820273  | 1.417384795747  |
| H | -1.459373443230 | 0.838046730235  | 2.207174914423  |
| H | -1.806906288701 | 1.864580133179  | 0.984464298080  |
| H | -0.416127062212 | 2.038285594280  | 1.822876147839  |
| N | 0.802380644030  | 1.786854820741  | -1.006701335282 |
| H | 1.482025480805  | 2.303145879926  | -0.442046759864 |
| H | 0.060615306048  | 2.456333355006  | -1.230690568722 |
| H | 1.267546822964  | 1.577201162322  | -1.893880480785 |
| N | -1.710212649272 | -0.058728964768 | -1.389588688679 |
| H | -1.903633259667 | -1.018641634896 | -1.688223776823 |
| H | -1.559731351870 | 0.478536332400  | -2.247804800841 |
| H | -2.584210474979 | 0.290130727007  | -0.986931089497 |
| N | -0.932654977369 | -1.709126079236 | 1.031349571734  |
| H | -0.585415907399 | -1.845357909284 | 1.984711491873  |
| H | -0.795287485749 | -2.601675564213 | 0.549594029270  |
| H | -1.946088830087 | -1.591060212427 | 1.114506549631  |

[Ru(NH<sub>3</sub>)<sub>6</sub>]<sup>2+</sup>

*E*(Def2-SV(P)) = -433.74130385

*G*(Def2-SV(P)) = -433.54287745

*E*(Def2-TZVP) = -434.23945955

2 1

|    |                |                 |                 |
|----|----------------|-----------------|-----------------|
| Ru | 0.000176293369 | -0.009434897836 | 0.006823578649  |
| N  | 1.252567851984 | -1.216480130959 | -1.291026202138 |
| H  | 2.242045808348 | -1.189637863599 | -1.027947315155 |
| H  | 1.219781768005 | -0.914062170892 | -2.268747163702 |
| H  | 1.000351925649 | -2.208720041343 | -1.302648626160 |
| N  | 1.189522708947 | 1.738981420857  | -0.478867791198 |

|   |                 |                 |                 |
|---|-----------------|-----------------|-----------------|
| H | 0.734627395135  | 2.363725137574  | -1.150593656576 |
| H | 2.100720370956  | 1.511190813268  | -0.886780769570 |
| H | 1.390303771843  | 2.319039205681  | 0.340976537814  |
| N | -1.242825928659 | 1.219016086916  | 1.293911336185  |
| H | -0.829212889524 | 1.387574552464  | 2.215256012407  |
| H | -2.165385945386 | 0.813632601346  | 1.475974997055  |
| H | -1.421690352892 | 2.147954863839  | 0.901423385621  |
| N | -1.322064705982 | 0.410669984818  | -1.661848872972 |
| H | -0.840741240124 | 0.811756124015  | -2.472011736478 |
| H | -2.068457515227 | 1.071994973428  | -1.429936551095 |
| H | -1.793583087128 | -0.428552142955 | -2.010876470299 |
| N | -1.199292507764 | -1.743899260313 | 0.509993344368  |
| H | -1.048086554996 | -2.545134624542 | -0.109593466939 |
| H | -2.205733243598 | -1.557688745886 | 0.472705590767  |
| H | -1.018630551434 | -2.090021018827 | 1.456562539809  |
| N | 1.321865990523  | -0.450349041851 | 1.670866602643  |
| H | 2.097365740246  | 0.212134061502  | 1.761421757324  |
| H | 1.755923173653  | -1.374735613639 | 1.593504394338  |
| H | 0.848978030419  | -0.446421645462 | 2.579332870099  |

[Ru(NH<sub>3</sub>)<sub>5</sub>py]<sup>2+</sup>

*E*(Def2-SV(P)) = -625.27008441

*G*(Def2-SV(P)) = -625.02154901

*E*(Def2-TZVP) = -625.96333331

2 1

|    |                |                 |                 |
|----|----------------|-----------------|-----------------|
| Ru | 0.893031786526 | 0.000474886699  | -0.001410778198 |
| N  | 0.911311375080 | 1.466601881197  | 1.593017307740  |
| H  | 1.579379226159 | 1.238877213028  | 2.335032611604  |
| H  | 0.004417760222 | 1.553657391434  | 2.062006025500  |
| H  | 1.162029507732 | 2.411300634566  | 1.287078350039  |
| N  | 0.901965787618 | 1.548223575568  | -1.518175371162 |
| H  | 1.650246634190 | 1.424144005106  | -2.206533064625 |
| H  | 1.025510786567 | 2.498210345515  | -1.155246288963 |
| H  | 0.033358250635 | 1.567040749914  | -2.061370259205 |
| N  | 0.904018195886 | -1.463272502672 | -1.598710481413 |
| H  | 1.151332033711 | -2.411161159150 | -1.299359732721 |

|   |                 |                 |                 |
|---|-----------------|-----------------|-----------------|
| H | 1.570821886338  | -1.232548029040 | -2.341133880617 |
| H | -0.004466991327 | -1.544522437355 | -2.065631178058 |
| N | 3.066816487901  | 0.001926849709  | 0.003016914659  |
| H | 3.471334600996  | 0.819032747735  | -0.462977015119 |
| H | 3.469963548147  | -0.815166727840 | -0.464166997441 |
| H | 3.468380499668  | 0.002351007537  | 0.944927985218  |
| N | 0.911054457172  | -1.549997168823 | 1.513042266014  |
| H | 0.077416281637  | -1.520774110802 | 2.108020343757  |
| H | 1.706612400024  | -1.474018020657 | 2.153380500806  |
| H | 0.957112856786  | -2.503908326673 | 1.142840951200  |
| C | -4.021688618176 | 0.000685001312  | -0.000772285150 |
| C | -3.306472121092 | 1.195784934974  | 0.005903147594  |
| C | -1.917644257916 | 1.150182282639  | 0.006947100962  |
| N | -1.218998071184 | 0.000134867414  | 0.001256392758  |
| C | -1.918063379234 | -1.149587195102 | -0.003718964703 |
| C | -3.306861430329 | -1.194684402932 | -0.005218270234 |
| H | -5.114530859910 | 0.000852480418  | -0.002211427912 |
| H | -3.811438742075 | 2.163828526458  | 0.009986579157  |
| H | -1.337638867132 | 2.076140699059  | 0.012174427856  |
| H | -1.338526773846 | -2.075670913745 | -0.006169268803 |
| H | -3.812138904804 | -2.162568841489 | -0.009711805047 |

[Co(en)<sub>3</sub>]<sup>2+</sup>

*E*(Def2-SV(P)) = -1953.46417136

*G*(Def2-SV(P)) = -1953.15577488

*E*(Def2-TZVP) = -1954.34396285

2 4

|    |                 |                 |                 |
|----|-----------------|-----------------|-----------------|
| Co | 0.002374750383  | 0.004387076986  | 0.000755485175  |
| N  | -0.387612516088 | -1.838392986517 | 1.141229577720  |
| N  | 1.236470721612  | -1.412102426565 | -1.140796549436 |
| N  | -1.807138003421 | -0.299222990094 | -1.211578305176 |
| N  | -1.421636651536 | 1.200045958293  | 1.168202520016  |
| N  | 1.729402199424  | 0.611159027267  | 1.218515692777  |
| N  | 0.675470899360  | 1.742112988852  | -1.163293758646 |
| C  | 0.057279107539  | -2.978992764633 | 0.325432121376  |
| C  | 1.378341013462  | -2.643550405876 | -0.347776956133 |

|   |                 |                 |                 |
|---|-----------------|-----------------|-----------------|
| C | -2.793969695912 | 0.711915721009  | -0.797430953771 |
| C | -2.778113588236 | 0.848355342391  | 0.716596283824  |
| C | 2.098030836709  | 1.977645024066  | 0.813562301542  |
| C | 2.027432175820  | 2.096579778562  | -0.700393524789 |
| H | -1.625851179326 | -0.220139334820 | -2.214525251035 |
| H | -2.195492269562 | -1.236451364302 | -1.081655564495 |
| H | -1.266969322118 | 2.204577317620  | 1.055383906180  |
| H | -1.328386784435 | 1.024029540240  | 2.170996733556  |
| H | 0.757560009604  | -1.620503905096 | -2.020951113548 |
| H | 2.157104526344  | -1.062345284956 | -1.412810702824 |
| H | -1.356375592928 | -1.973954485677 | 1.436491160323  |
| H | 0.154826750573  | -1.803062203211 | 2.008494468316  |
| H | 2.524880484636  | -0.017591936850 | 1.083891454941  |
| H | 1.531054930982  | 0.584637545755  | 2.220982870631  |
| H | 0.050056747446  | 2.544034779665  | -1.056157874263 |
| H | 0.688196052331  | 1.542715904802  | -2.165917152866 |
| H | 2.319489125312  | 3.112624422645  | -1.014832882769 |
| H | 2.741966535768  | 1.395107845343  | -1.161261253406 |
| H | 3.104451877875  | 2.257695705335  | 1.167841626976  |
| H | 1.382030587211  | 2.675767043499  | 1.277437292126  |
| H | -0.712568067478 | -3.172969913333 | -0.439583542541 |
| H | 0.164238702089  | -3.900540154272 | 0.922319391646  |
| H | 2.150091084287  | -2.468181072783 | 0.419664998356  |
| H | 1.714929911307  | -3.496306581055 | -0.961190397990 |
| H | -3.053388131035 | -0.114163536804 | 1.177588905490  |
| H | -3.527574620664 | 1.590679984257  | 1.038700068927  |
| H | -2.515813492651 | 1.671674673970  | -1.263158868776 |
| H | -3.811467970968 | 0.463483470085  | -1.143510691375 |

[Ru(en)<sub>3</sub>]<sup>2+</sup>

$E(\text{Def2-SV(P)}) = -665.74721794$

$G(\text{Def2-SV(P)}) = -665.43219115$

$E(\text{Def2-TZVP}) = -666.46727108$

2 1

|    |                 |                |                 |
|----|-----------------|----------------|-----------------|
| Ru | 0.000395579515  | 0.014936405775 | -0.007077812290 |
| N  | -1.343995798137 | 1.330237485846 | 1.064572750287  |



|   |                 |                 |                 |
|---|-----------------|-----------------|-----------------|
| N | -1.761380298845 | -0.230825968638 | -1.239745993011 |
| N | 0.775488115010  | 1.678227161278  | -1.158445954814 |
| N | 1.716353680583  | 0.512118894379  | 1.220192529976  |
| N | -0.530160301929 | -1.729868713652 | 1.158253893499  |
| N | 1.158372867724  | -1.468582460425 | -1.078276710240 |
| C | -2.723234283927 | 1.023415306558  | 0.627184220683  |
| C | -2.738890770377 | 0.819426222760  | -0.876527374038 |
| C | 1.756686599612  | 2.405215929474  | -0.324895491123 |
| C | 2.601633092392  | 1.407385475752  | 0.444594453256  |
| C | 0.410533751470  | -2.819184042630 | 0.815601821964  |
| C | 0.670395180916  | -2.806627637181 | -0.679463722234 |
| H | 1.240521245786  | 1.327959049702  | -2.000004554341 |
| H | 0.075687287275  | 2.337947441164  | -1.505064872344 |
| H | 2.259082371820  | -0.284148365592 | 1.561803014759  |
| H | 1.404977910637  | 0.996354528040  | 2.066230422180  |
| H | -1.552117199748 | -0.168937598541 | -2.238563958201 |
| H | -2.198990432986 | -1.148494214497 | -1.121891395738 |
| H | -1.149678691888 | 2.319562262083  | 0.887717512851  |
| H | -1.282919516629 | 1.227393926305  | 2.080239034993  |
| H | -1.487262290254 | -2.047255104804 | 0.981079013241  |
| H | -0.495972969169 | -1.555726753209 | 2.165148738499  |
| H | 2.158323689318  | -1.403395161768 | -0.870830557098 |
| H | 1.093818515863  | -1.375984157105 | -2.094517787781 |
| H | 1.388096721976  | -3.598581805566 | -0.951188788317 |
| H | -0.264703387498 | -3.003165360830 | -1.228194513119 |
| H | 0.026092051736  | -3.803039046432 | 1.131811454242  |
| H | 1.351173378908  | -2.641044507600 | 1.361073024854  |
| H | -3.427990157865 | 1.821679048786  | 0.913996315991  |
| H | -3.041808651375 | 0.099785879655  | 1.136521170500  |
| H | -3.755176549511 | 0.563655674195  | -1.219394429129 |
| H | -2.444404503928 | 1.751344272257  | -1.385203055133 |
| H | 3.319304954108  | 1.934112737948  | 1.095448516056  |
| H | 3.184035226401  | 0.788349422470  | -0.256926828972 |
| H | 2.398804045294  | 3.064035914307  | -0.932961468031 |
| H | 1.198164265518  | 3.043329846828  | 0.378949172714  |

[Fe(bpy)<sub>3</sub>]<sup>2+</sup>

*E*(Def2-SV(P)) = -2748.02366289

*G*(Def2-SV(P)) = -2747.58450044

*E*(Def2-TZVP) = -2749.80275749

2 1

|    |                 |                 |                 |
|----|-----------------|-----------------|-----------------|
| Fe | -0.002700511509 | 0.001544107961  | 0.002538398494  |
| C  | -4.117442900169 | -0.915096710833 | 2.242153296239  |
| C  | -1.002085480039 | 1.901586111950  | -2.079745419761 |
| C  | -1.950272066836 | 2.694998391866  | -2.715172930717 |
| C  | -3.259215178521 | 2.673615925769  | -2.243757071586 |
| C  | -3.571519384426 | 1.860885003440  | -1.157971927185 |
| C  | -2.565804571580 | 1.092217519022  | -0.574158910155 |
| C  | -2.782108839210 | 0.188097996541  | 0.578017179795  |
| C  | -4.027709247162 | -0.046734676636 | 1.158201468081  |
| C  | -2.959324328758 | -1.523700945168 | 2.715790302185  |
| C  | -1.753795592941 | -1.240584693579 | 2.084176214974  |
| H  | 0.033704670425  | 1.888047871356  | -2.423996129377 |
| H  | -1.657362971019 | 3.315333886109  | -3.563879263344 |
| H  | -4.590758460797 | 1.834047124607  | -0.772460354243 |
| H  | -4.924921354772 | 0.436381242924  | 0.770997234612  |
| H  | -2.978873716810 | -2.211070177551 | 3.563178947361  |
| H  | -0.823858871628 | -1.695710698489 | 2.430046305680  |
| N  | -1.299282463048 | 1.119717997915  | -1.037385189688 |
| N  | -1.664515439316 | -0.407010738103 | 1.043314828839  |
| C  | 1.943511479630  | -0.892578066046 | 2.089323075585  |
| C  | 2.785497692643  | -1.796343101320 | 2.726964732440  |
| C  | 2.838252376607  | -3.103914536850 | 2.254233291734  |
| C  | 2.048232165940  | -3.459345166520 | 1.164955359609  |
| C  | 1.227571940391  | -2.496908135987 | 0.578963937831  |
| C  | 0.340770011550  | -2.761716893733 | -0.576614755583 |
| C  | 0.187726073725  | -4.015051588149 | -1.167384340202 |
| C  | -0.670393539602 | -4.151465475462 | -2.254610233805 |
| C  | -1.351431920150 | -3.031096955108 | -2.720443917586 |
| C  | -1.147076445806 | -1.814885031214 | -2.078992568945 |
| C  | -0.192020797914 | 2.142688359235  | 2.081894516929  |
| C  | 0.176788297801  | 3.322692649922  | 2.717600347462  |

|   |                 |                 |                 |
|---|-----------------|-----------------|-----------------|
| C | 1.288822865020  | 4.013060622616  | 2.245455114334  |
| C | 1.989612249970  | 3.499224272987  | 1.158338443397  |
| C | 1.558858025501  | 2.309160014810  | 0.574174571310  |
| C | 2.227338295907  | 1.668251008801  | -0.580844284422 |
| C | 3.395534182472  | 2.151129433455  | -1.168559478843 |
| C | 3.936871732852  | 1.473505014900  | -2.257032757673 |
| C | 3.294514727409  | 0.332425780304  | -2.727447539924 |
| C | 2.134176898494  | -0.088225574812 | -2.088033099663 |
| H | 1.871205113809  | 0.140285873485  | 2.435044946613  |
| H | 3.385038009940  | -1.470554045032 | 3.578635993833  |
| H | 2.078358383407  | -4.478351811273 | 0.779077914819  |
| H | 0.727844115498  | -4.882215723113 | -0.787074346592 |
| H | -2.033865160534 | -3.087802033373 | -3.570171459982 |
| H | -1.658440408946 | -0.912771798793 | -2.419856730646 |
| H | -1.055241975309 | 1.570496244575  | 2.426800256394  |
| H | -0.404259154857 | 3.685184616177  | 3.567265795654  |
| H | 2.861205903069  | 4.028119353969  | 0.772473138088  |
| H | 3.885697515540  | 3.045624083873  | -0.784127572704 |
| H | 3.679127474346  | -0.232239615469 | -3.578402737072 |
| H | 1.600200166654  | -0.975959268325 | -2.431781349524 |
| N | 1.183439739311  | -1.231316699371 | 1.043459124252  |
| N | -0.322887038183 | -1.680778063975 | -1.035547904117 |
| N | 0.479625665244  | 1.646527394171  | 1.038434932870  |
| N | 1.612196689477  | 0.560270124610  | -1.042549270989 |
| H | -5.085087347912 | -1.112485984047 | 2.708930649296  |
| H | -4.033953255976 | 3.283666992303  | -2.713644333035 |
| H | 4.852051202111  | 1.836719831643  | -2.730020457438 |
| H | 1.611629169728  | 4.944713592540  | 2.715644419175  |
| H | 3.488023420624  | -3.844398818870 | 2.726100032653  |
| H | -0.803189171866 | -5.125718317640 | -2.730391295003 |

[Co(bpy)<sub>3</sub>]<sup>2+</sup>

*E*(Def2-SV(P)) = -2867.07050715

*G*(Def2-SV(P)) = -2866.63868222

*E*(Def2-TZVP) = -2868.86350428

2 4

|    |                 |                 |                 |
|----|-----------------|-----------------|-----------------|
| Co | -0.004796973917 | 0.002681799058  | -0.002492841212 |
| C  | 1.430913286100  | -4.194271019693 | -2.101162534918 |
| C  | 2.308667718550  | 0.101582788460  | 2.055190799831  |
| C  | 3.518627878851  | -0.252474375244 | 2.642277649468  |
| C  | 4.181851742257  | -1.375099763023 | 2.155312442903  |
| C  | 3.615530877253  | -2.100754297520 | 1.110075276684  |
| C  | 2.395060059743  | -1.683245920822 | 0.578233550104  |
| C  | 1.707339136233  | -2.388490485840 | -0.539992075365 |
| C  | 2.140200799099  | -3.611230065284 | -1.053902949557 |
| C  | 0.308863103193  | -3.545079143415 | -2.607979151591 |
| C  | -0.061330469103 | -2.331791116563 | -2.037828265888 |
| H  | 1.749516192257  | 0.976611963888  | 2.398371023647  |
| H  | 3.926858910922  | 0.344915541325  | 3.459313107588  |
| H  | 4.132532157861  | -2.975426663979 | 0.715354176665  |
| H  | 3.014289922022  | -4.117287634350 | -0.644005270082 |
| H  | -0.275758063422 | -3.966680805839 | -3.427469386076 |
| H  | -0.936682142573 | -1.783082635000 | -2.396789312887 |
| N  | 1.766462436823  | -0.595719759615 | 1.055966214310  |
| N  | 0.620345868246  | -1.773660364064 | -1.036576491944 |
| C  | -1.981000021582 | 1.216144472971  | -2.052361976595 |
| C  | -3.211506177669 | 1.501220362038  | -2.634280546496 |
| C  | -4.338613795538 | 0.850527544542  | -2.140741939916 |
| C  | -4.197433838316 | -0.058290427484 | -1.094780769724 |
| C  | -2.926678054863 | -0.294108709103 | -0.569076442993 |
| C  | -2.668066940049 | -1.244303382776 | 0.549290481982  |
| C  | -3.641043853688 | -2.100652728955 | 1.065731686364  |
| C  | -3.304335388172 | -2.952280477596 | 2.115112297009  |
| C  | -2.007952603736 | -2.929542945367 | 2.621107020826  |
| C  | -1.093992164379 | -2.052420092040 | 2.047160815531  |
| C  | 2.056718701431  | 1.090670111545  | -2.044799265741 |
| C  | 2.929872586577  | 2.006832996612  | -2.621238708876 |
| C  | 2.937252719568  | 3.308237598827  | -2.127832881867 |
| C  | 2.075032681777  | 3.647419736176  | -1.087947935152 |
| C  | 1.223715033650  | 2.671819879620  | -0.568142499679 |
| C  | 0.263521264841  | 2.932508737199  | 0.541163201555  |
| C  | 0.016701736468  | 4.205345070692  | 1.056671907795  |

|   |                 |                 |                 |
|---|-----------------|-----------------|-----------------|
| C | -0.900192880109 | 4.348202658119  | 2.095319750719  |
| C | -1.547944370284 | 3.220680187503  | 2.591758243567  |
| C | -1.251648455147 | 1.987994956271  | 2.020138022180  |
| H | -1.065597356743 | 1.703057261279  | -2.400416104906 |
| H | -3.277576353243 | 2.220651792071  | -3.452309150704 |
| H | -5.076027783881 | -0.564460797861 | -0.694505679884 |
| H | -4.651054862184 | -2.118567986355 | 0.656035229481  |
| H | -1.702098518335 | -3.579580045913 | 3.442689447454  |
| H | -0.061918183523 | -1.999295583811 | 2.405063288153  |
| H | 2.015380063406  | 0.054758947737  | -2.393035301405 |
| H | 3.588615419054  | 1.698844527722  | -3.435049458321 |
| H | 2.080742642113  | 4.661569716553  | -0.688269457032 |
| H | 0.521021342721  | 5.084105124095  | 0.654459523559  |
| H | -2.273330664943 | 3.288013082451  | 3.404400804110  |
| H | -1.735446655114 | 1.072051172867  | 2.371100853343  |
| N | -1.847243340448 | 0.343962834774  | -1.052339548494 |
| N | -1.418194580179 | -1.236391107357 | 1.043357884391  |
| N | 1.230410051865  | 1.417283728361  | -1.050210708369 |
| N | -0.371666079263 | 1.852652081177  | 1.027224364716  |
| H | 1.755706349800  | -5.152401478941 | -2.513749341243 |
| H | 5.138020525054  | -1.687616605392 | 2.581690457841  |
| H | -1.106368575465 | 5.337883273486  | 2.509655474091  |
| H | 3.611666372505  | 4.059534439725  | -2.545399179686 |
| H | -5.326717852684 | 1.048372136957  | -2.562849593895 |
| H | -4.053579013610 | -3.630506418023 | 2.530203335351  |

[Ru(bpy)<sub>3</sub>]<sup>2+</sup>

*E*(Def2-SV(P)) = -1579.36709892

*G*(Def2-SV(P)) = -1578.92924469

*E*(Def2-TZVP) = -1581.00735538

2 1

|    |                 |                |                 |
|----|-----------------|----------------|-----------------|
| Ru | 0.003551721976  | 0.000655354421 | -0.000006763313 |
| C  | -3.680337448550 | 2.201384425280 | 2.282173251457  |
| C  | 0.488563138584  | 2.180373707645 | -2.092778505275 |
| C  | 0.288685975421  | 3.395128271246 | -2.736070264843 |
| C  | -0.713408406091 | 4.239922943927 | -2.267701577360 |

|   |                 |                 |                 |
|---|-----------------|-----------------|-----------------|
| C | -1.476988149754 | 3.840221915940  | -1.175575948762 |
| C | -1.222297158310 | 2.606790264121  | -0.576767210109 |
| C | -1.977534007365 | 2.088272820200  | 0.587109176746  |
| C | -3.036629370610 | 2.768960266437  | 1.187144264772  |
| C | -3.248021980008 | 0.965044533860  | 2.753122646774  |
| C | -2.187383900045 | 0.341968907834  | 2.108092247477  |
| H | 1.259506592987  | 1.484133984012  | -2.428677519146 |
| H | 0.912984077068  | 3.664778728817  | -3.589528579443 |
| H | -2.264481475890 | 4.491471328440  | -0.796438826411 |
| H | -3.363777531183 | 3.736658493682  | 0.806835604327  |
| H | -3.720076757658 | 0.481113560232  | 3.609753831717  |
| H | -1.810995633323 | -0.625633774943 | 2.445741018005  |
| N | -0.246399032792 | 1.793850579552  | -1.042563323313 |
| N | -1.567585912041 | 0.886595373236  | 1.053735619572  |
| C | 0.803220492033  | -2.088646829952 | 2.089383534211  |
| C | 0.786035178195  | -3.321883548990 | 2.728277629636  |
| C | -0.080924231193 | -4.303847483267 | 2.257698989774  |
| C | -0.896938989883 | -4.017216183412 | 1.168034337126  |
| C | -0.828270562968 | -2.757448949117 | 0.573773403719  |
| C | -1.654384199273 | -2.352050483567 | -0.586693255056 |
| C | -2.604833468927 | -3.179271052410 | -1.184200157735 |
| C | -3.330422836289 | -2.709770239596 | -2.274387944922 |
| C | -3.086986052532 | -1.421811503691 | -2.742548426302 |
| C | -2.125972659746 | -0.651511262775 | -2.100303601527 |
| C | 1.406172427045  | 1.727593512681  | 2.101854711123  |
| C | 2.479985513645  | 2.332657978573  | 2.742290450722  |
| C | 3.764753070102  | 2.083161340851  | 2.268603241756  |
| C | 3.928262164988  | 1.239222059825  | 1.174744781724  |
| C | 2.805604888890  | 0.665417080464  | 0.578731650457  |
| C | 2.871116971974  | -0.247948479524 | -0.585382866182 |
| C | 4.064200187856  | -0.652090495371 | -1.183852749375 |
| C | 4.023305642991  | -1.513604670384 | -2.275454682622 |
| C | 2.787789999158  | -1.950954603015 | -2.743983942148 |
| C | 1.638602510857  | -1.508771913715 | -2.101199153755 |
| H | 1.462806075266  | -1.286993882063 | 2.427308925102  |
| H | 1.444615745731  | -3.499299665552 | 3.580138578270  |

|   |                 |                 |                 |
|---|-----------------|-----------------|-----------------|
| H | -1.580012784338 | -4.776232478337 | 0.786805702670  |
| H | -2.784042323406 | -4.185248332123 | -0.805062169624 |
| H | -3.629625103025 | -1.009593892301 | -3.594900252616 |
| H | -1.899372260397 | 0.362304505103  | -2.436095964532 |
| H | 0.381627726350  | 1.890599731691  | 2.441869891677  |
| H | 2.301462170859  | 2.986348823796  | 3.597677484853  |
| H | 4.928071811255  | 1.034084991435  | 0.792281313194  |
| H | 5.024068144458  | -0.301651888826 | -0.804621012706 |
| H | 2.704706471453  | -2.626475571792 | -3.596993184866 |
| H | 0.648022305724  | -1.822072058194 | -2.436777470764 |
| N | 0.017836350607  | -1.811054921018 | 1.041129603988  |
| N | -1.426935576325 | -1.102040658893 | -1.050966594752 |
| N | 1.561985686786  | 0.915428892262  | 1.048858662770  |
| N | 1.676422853774  | -0.679128154634 | -1.050992158888 |
| H | -4.511495121358 | 2.723695099074  | 2.761127466538  |
| H | -0.902395835199 | 5.203489128951  | -2.746065972514 |
| H | 4.950454176929  | -1.838193138416 | -2.753016339785 |
| H | 4.635684737567  | 2.539623783573  | 2.744153476895  |
| H | -0.124712207705 | -5.286698197709 | 2.732174835094  |
| H | -4.078165824524 | -3.347280960722 | -2.751335536120 |

#### 4. Cartesian coordinates and energies of SX geometries obtained from the initial SX geometry generation at the U $\omega$ B97X-D/Def2-SV(P) level

The initial SX geometries and energy components are presented below. These energy components are:

$$\Delta E_1^{MM} = (E_{n+m+1}^{C-MM-Initial} - E_{n+1}^D-MM - E_m^A-MM) - (E_{n+m}^{C-MM} - E_n^D-MM - E_m^A-MM)$$

$$\Delta E_2^{MM} = (E_{n+m+1}^{C-MM-Final} - E_n^D-MM - E_{m+1}^A-MM) - (E_{n+m}^{C-MM} - E_n^D-MM - E_m^A-MM)$$

$$E_1' = E_{n+m}^C - E_n^D + E_{n+1}^D + \Delta E_1^{MM}$$

$$E_2' = E_{n+m}^C - E_m^A + E_{m+1}^A + \Delta E_2^{MM}$$

In the following, energy values at the U $\omega$ B97X-D/Def2-SV(P) level are given in Hartree.

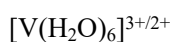

$$\Delta E_1^{MM} = -0.01410198 = (2788.86751406 - 1393.98382572 - 1394.69624301) - (2789.02029933 - 1394.12250901 - 1394.69624301)$$

$$\Delta E_2^{MM} = -0.01278579 = (2788.96714950 - 1394.12250901 - 1394.65587897) - (2789.02029933 - 1394.12250901 - 1394.69624301)$$

$$E_1' = -2803.30972991 = (-2803.08550116) - (-1401.54173731) + (-1401.75186408) + (-0.01410198)$$

$$E_2' = -2803.30972402 = (-2803.08550116) - (-1401.54012910) + (-1401.75156618) + (-0.01278579)$$

$$G(\text{Def2-SV(P)}) = -2803.06978602$$

|   |                 |                 |                 |
|---|-----------------|-----------------|-----------------|
| V | -2.677379515715 | -0.066131263419 | -0.060739331285 |
| O | -1.183698986749 | -1.409341655657 | -0.855464564496 |
| O | -2.542195748090 | -1.117972289537 | 1.713635273232  |
| O | -4.093104490340 | 1.242879871059  | 0.650693272583  |
| O | -2.735025339656 | 0.956057766164  | -1.856116522669 |
| O | -1.140264235641 | 1.111727134822  | 0.589108578086  |
| O | -4.203042673452 | -1.258239215631 | -0.757469807907 |
| H | -4.191226102674 | -2.219470183888 | -0.912916156090 |
| H | -1.337982255126 | -1.811333584478 | -1.734059339856 |
| H | -3.099721747666 | -1.887347141004 | 1.928359794870  |
| H | -4.433023991378 | 1.977241365788  | 0.108422560687  |
| H | -3.091871568753 | 0.571340666432  | -2.676412340977 |
| H | -1.204303600663 | 2.071887659824  | 0.735287909893  |
| H | -0.933467372300 | -2.138818080787 | -0.252809357021 |
| H | -2.235239623863 | -0.719908444879 | 2.547860841450  |
| H | -4.228301212595 | 1.458261377032  | 1.590498360645  |
| H | -2.139248495473 | 1.689882946564  | -2.089345083394 |
| H | -0.287472320968 | 0.787287411799  | 0.974770231701  |



|   |                 |                 |                 |
|---|-----------------|-----------------|-----------------|
| H | -5.128782049716 | -0.954700532705 | -0.762318242006 |
| V | 2.672290522087  | 0.120317552525  | 0.044332162557  |
| O | 4.086139867670  | 0.127445185011  | -1.455205901992 |
| O | 2.603216151699  | -1.948110452985 | 0.155932912182  |
| O | 1.220915760669  | 0.166055257375  | 1.654001048811  |
| O | 2.703628126180  | 2.176971809464  | -0.051917366005 |
| O | 4.281929348423  | 0.086375119738  | 1.324642201312  |
| O | 1.090888172264  | 0.065643747704  | -1.241510108536 |
| H | 1.053237299072  | 0.524411666263  | -2.098716900225 |
| H | 4.157068953647  | 0.859971857233  | -2.093080502486 |
| H | 2.171238863773  | -2.512085345953 | -0.509982934323 |
| H | 1.388640183455  | 0.773725998731  | 2.402107211409  |
| H | 1.927072451113  | 2.750355397753  | -0.179359643916 |
| H | 4.308018119392  | -0.161569002281 | 2.265826161862  |
| H | 4.421250848406  | -0.683800169380 | -1.877030497223 |
| H | 3.318429564146  | -2.462466188391 | 0.571859988897  |
| H | 1.021225742160  | -0.709077653102 | 2.044406394686  |
| H | 3.452559758683  | 2.724876104862  | 0.243038143494  |
| H | 5.192165214856  | 0.227533534603  | 1.007491032331  |
| H | 0.255573288643  | -0.454152543463 | -1.123170109254 |

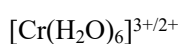

$$\Delta E_1^{\text{MM}} = -0.01460320 = (2756.32818219 - 1378.41756027 - 1377.61270435)$$

$$- (2756.49097123 - 1378.56574611 - 1377.61270435)$$

$$\Delta E_2^{\text{MM}} = -0.01457846 = (2756.30880476 - 1378.56574611 - 1377.44511635)$$

$$- (2756.49097123 - 1378.56574611 - 1377.61270435)$$

$$E'_1 = -3004.15405798 = (-3003.93001608) - (-1501.96131572) + (-1502.17075442) + (-0.01460320)$$

$$E'_2 = -3004.15405946 = (-3003.93001608) - (-1501.96187526) + (-1502.17134018) + (-0.01457846)$$

$$G(\text{Def2-SV(P)}) = -3003.91415195$$

|    |                 |                 |                 |
|----|-----------------|-----------------|-----------------|
| Cr | -2.656543978072 | -0.350718209000 | 0.013503254378  |
| O  | -1.034647989367 | 0.097864654531  | -1.482056448435 |
| O  | -2.292967766162 | -2.334913957495 | -0.125985669523 |
| O  | -4.260579816119 | -0.663753961371 | 1.346034585286  |
| O  | -2.906728196889 | 1.651558168671  | 0.029906148102  |
| O  | -1.239303896758 | -0.135829521591 | 1.419175714664  |
| O  | -4.118488004141 | -0.459986455705 | -1.382840211199 |

|    |                 |                 |                 |
|----|-----------------|-----------------|-----------------|
| H  | -4.013828170665 | -0.621247498596 | -2.338179622896 |
| H  | -1.280800725559 | 0.748839193728  | -2.169429782454 |
| H  | -2.833941920400 | -2.925033763124 | -0.681814541423 |
| H  | -4.611607670588 | 0.062872511719  | 1.893099171606  |
| H  | -3.707724978138 | 2.084328360463  | -0.317678131815 |
| H  | -1.471929524545 | -0.060678617254 | 2.362108204589  |
| H  | -0.669512058657 | -0.678144822427 | -1.952426060768 |
| H  | -1.880972314010 | -2.860695103355 | 0.583549426631  |
| H  | -4.323390682378 | -1.486832332535 | 1.864589251409  |
| H  | -2.480216351231 | 2.231774136934  | 0.686176385919  |
| H  | -0.325548461041 | -0.528200259828 | 1.349877032815  |
| H  | -5.000853530538 | -0.762187315272 | -1.098340155995 |
| Cr | 2.602936767348  | 0.410870983190  | 0.556887281691  |
| O  | 3.956215776683  | 1.920295311046  | -0.014777027883 |
| O  | 2.830013624503  | -0.646432748401 | -1.154513195759 |
| O  | 1.217281816344  | -1.215341185613 | 1.259031136159  |
| O  | 2.346565409728  | 1.435047430055  | 2.286400637937  |
| O  | 4.235774914240  | -0.472105554334 | 1.363181832319  |
| O  | 0.975722069002  | 1.322972450937  | -0.179961704479 |
| H  | 0.996429946031  | 2.258077997144  | -0.450521319164 |
| H  | 3.941850816400  | 2.767694517253  | 0.466677261474  |
| H  | 2.496750094209  | -0.325456279823 | -2.012690868101 |
| H  | 1.366135992750  | -1.576676397198 | 2.156152495221  |
| H  | 1.487592879615  | 1.819346806952  | 2.540030194282  |
| H  | 4.341034572374  | -1.404646481822 | 1.624393738313  |
| H  | 4.166714287900  | 2.103897874904  | -0.948282616465 |
| H  | 3.627385251011  | -1.184442642040 | -1.312415092529 |
| H  | 1.184658146576  | -1.984380657241 | 0.654736183204  |
| H  | 2.832647319382  | 1.180579790284  | 3.092062219525  |
| H  | 5.112466800650  | -0.084858235357 | 1.183204561961  |
| H  | 0.229656252459  | 0.867123390065  | -0.658991586609 |

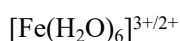

$$\Delta E_1^{\text{MM}} = -0.01346685 = (2774.37970420 - 1386.23933161 - 1387.91193106) \\ - (2774.42529675 - 1386.27145731 - 1387.91193106)$$

$$\Delta E_2^{\text{MM}} = -0.01335348 = (2774.40223481 - 1386.27145731 - 1387.90222260)$$

$$-(2774.42529675 - 1386.27145731 - 1387.91193106)$$

$$E'_1 = -3442.57740070 = (-3442.30941512) - (-1721.15196186) + (-1721.40648059) + (-0.01346685)$$

$$E'_2 = -3442.57739801 = (-3442.30941512) - (-1721.15179503) + (-1721.40642443) + (-0.01335348)$$

$$G(\text{Def2-SV(P)}) = -3442.34028312$$

|    |                 |                 |                 |
|----|-----------------|-----------------|-----------------|
| Fe | -2.653830416987 | -0.020018274619 | -0.232500451317 |
| O  | -1.079227878546 | 1.424251350616  | -0.721779128396 |
| O  | -2.390267485978 | -0.903051043506 | -2.058207467770 |
| O  | -4.208116336598 | -1.246376208450 | 0.320970715337  |
| O  | -2.867401326607 | 0.999552062281  | 1.532535026310  |
| O  | -1.204230490743 | -1.211090174132 | 0.551426726754  |
| O  | -4.076098183356 | 1.235346888926  | -1.042131750990 |
| H  | -3.969440904450 | 1.901149202940  | -1.745085843216 |
| H  | -1.255282221832 | 2.370960356903  | -0.551557977484 |
| H  | -2.923111939107 | -0.686897770999 | -2.845005769484 |
| H  | -4.550391762166 | -1.238260512320 | 1.233340791711  |
| H  | -3.447941167897 | 1.775279003516  | 1.635839511593  |
| H  | -1.319371334835 | -1.768443195061 | 1.340887562346  |
| H  | -0.725380868329 | 1.363322874473  | -1.631830152540 |
| H  | -1.941985079651 | -1.754865556512 | -2.209658449104 |
| H  | -4.394674983034 | -2.116970053497 | -0.075525199592 |
| H  | -2.297732256195 | 0.922452684743  | 2.318955836842  |
| H  | -0.304276617319 | -1.385945488927 | 0.168301941683  |
| H  | -5.024991442594 | 1.037069127326  | -0.943289348535 |
| Fe | 2.614223786779  | -0.270923254579 | 0.505823757061  |
| O  | 3.910086418297  | 0.921369223449  | 1.566625173981  |
| O  | 2.901392665263  | 0.809724182482  | -1.208270113526 |
| O  | 1.244321677240  | -1.583377793984 | -0.591438514974 |
| O  | 2.308306607928  | -1.441275737348 | 2.156996941776  |
| O  | 4.232471771416  | -1.466743275341 | 0.060548389513  |
| O  | 0.988426120526  | 0.863100172513  | 0.947452541492  |
| H  | 0.881428626741  | 1.365908055113  | 1.773777278993  |
| H  | 3.986051214599  | 0.874721294481  | 2.536887742579  |
| H  | 2.452973885982  | 1.645092281024  | -1.433157964136 |
| H  | 1.404321405846  | -2.547654479860 | -0.558581476614 |
| H  | 1.540944182382  | -1.414935422438 | 2.756359001181  |
| H  | 4.371741992750  | -2.046339045412 | -0.709707555635 |

|   |                |                 |                 |
|---|----------------|-----------------|-----------------|
| H | 4.203401248378 | 1.801844262518  | 1.270360684437  |
| H | 3.640653440284 | 0.673468874046  | -1.828263882095 |
| H | 1.132243061513 | -1.351016817503 | -1.535081286237 |
| H | 2.847245379812 | -2.225878970213 | 2.364249226948  |
| H | 5.093864669651 | -1.303225276802 | 0.485902732651  |
| H | 0.219362801841 | 1.064567615147  | 0.351729844467  |

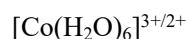

$$\Delta E_1^{\text{MM}} = -0.01380583 = (2760.68323729 - 1380.38217056 - 1380.05429515) \\ - (2760.96441481 - 1380.64954226 - 1380.05429515)$$

$$\Delta E_2^{\text{MM}} = -0.01346286 = (2760.71229661 - 1380.64954226 - 1379.81563980) \\ - (2760.96441481 - 1380.64954226 - 1380.05429515)$$

$$E'_1 = -3680.61588511 = (-3680.29905441) - (-1840.14684551) + (-1840.44987038) + (-0.01380583)$$

$$E'_2 = -3680.61588695 = (-3680.29905441) - (-1840.14687274) + (-1840.45024241) + (-0.01346286)$$

$$G(\text{Def2-SV(P)}) = -3680.37224723$$

|    |                 |                 |                 |
|----|-----------------|-----------------|-----------------|
| Co | -2.638734439171 | -0.046474449081 | -0.060421456864 |
| O  | -1.210887113487 | 0.159879783727  | -1.671175986674 |
| O  | -2.511393902548 | -2.050938463443 | -0.213872424892 |
| O  | -3.862101737813 | -0.281199581425 | 1.565790921501  |
| O  | -2.651263157350 | 1.963787023502  | 0.079552328132  |
| O  | -1.098997574629 | -0.058647653324 | 1.223965171563  |
| O  | -4.162015138564 | -0.072100208951 | -1.375018279769 |
| H  | -4.218265417652 | 0.418986314229  | -2.214885648038 |
| H  | -1.001922440668 | 1.090874768214  | -1.887970349573 |
| H  | -2.857790336146 | -2.570038538039 | -0.962913727877 |
| H  | -4.449707663332 | 0.439699889921  | 1.856825940555  |
| H  | -3.277019039216 | 2.554092448168  | -0.379581819310 |
| H  | -1.211362447999 | -0.393035349181 | 2.131645626857  |
| H  | -1.394960984806 | -0.289634349860 | -2.520018837766 |
| H  | -1.853644161895 | -2.585030699512 | 0.268367543176  |
| H  | -4.333559666058 | -1.125291072085 | 1.688390484942  |
| H  | -2.275396736159 | 2.436372848324  | 0.845238396583  |
| H  | -0.248887492855 | 0.452219417715  | 1.166392059610  |
| H  | -5.022263060130 | -0.499217498762 | -1.209093006050 |
| Co | 2.626160145029  | -0.009274064082 | 0.061895873188  |
| O  | 3.984550348205  | -1.285620937525 | -0.778881562181 |

|   |                |                 |                 |
|---|----------------|-----------------|-----------------|
| O | 2.533274765520 | -1.236891683890 | 1.662679675612  |
| O | 1.224342231175 | 1.335298721253  | 0.994660305348  |
| O | 2.631364435066 | 1.295400703748  | -1.481523081943 |
| O | 4.183041489150 | 0.922066103145  | 0.946603984218  |
| O | 1.082726661699 | -0.963816547131 | -0.776266960095 |
| H | 1.106137225803 | -1.901095758587 | -1.037803189043 |
| H | 4.007395645879 | -1.470653805201 | -1.735004125614 |
| H | 1.813751482804 | -1.875672504706 | 1.819119059615  |
| H | 1.023448287320 | 2.120606836815  | 0.446848001742  |
| H | 2.240973394917 | 1.092239403751  | -2.351663146458 |
| H | 4.249593277062 | 1.852858026566  | 1.226418222445  |
| H | 4.199401484122 | -2.109001283682 | -0.303403128094 |
| H | 2.967547427159 | -1.031074800515 | 2.511074273148  |
| H | 1.405786610265 | 1.661892850176  | 1.898343718134  |
| H | 3.338702253182 | 1.955527066305  | -1.604568054727 |
| H | 5.079521071220 | 0.541819766939  | 0.902735493755  |
| H | 0.236791720753 | -0.560440702180 | -1.111049005309 |

[Ru(H<sub>2</sub>O)<sub>6</sub>]<sup>3+/2+</sup>

$\Delta E_1^{\text{MM}} = -0.01312151 = (2752.83764279 - 1372.38694452 - 1380.24644281)$   
 $- (2752.87733592 - 1372.41351614 - 1380.24644281)$

$\Delta E_2^{\text{MM}} = -0.01200464 = (2752.81050307 - 1372.41351614 - 1380.19161461)$   
 $- (2752.87733592 - 1372.41351614 - 1380.24644281)$

$E'_1 = -1105.14058262 = (-1104.89962492) - (-552.44798991) + (-552.67582610) + (-0.01312151)$

$E'_2 = -1105.14058092 = (-1104.89962492) - (-552.44643726) + (-552.67538861) + (-0.01200464)$

$G(\text{Def2-SV(P)}) = -1104.88413656$

|    |                 |                 |                 |
|----|-----------------|-----------------|-----------------|
| Ru | -2.690204144839 | 0.047992392758  | -0.151650344202 |
| O  | -1.149408382141 | -0.497509934512 | -1.552329776293 |
| O  | -2.478412253974 | -1.981093662035 | 0.411236030592  |
| O  | -4.213034871297 | 0.569160079438  | 1.171990152981  |
| O  | -2.875688206545 | 2.069154529986  | -0.714089111746 |
| O  | -1.158085140747 | 0.609428386353  | 1.105144616966  |
| O  | -4.248182351327 | -0.373753324917 | -1.459211749699 |
| H  | -4.232058903822 | -1.105394717949 | -2.102977113829 |
| H  | -1.321011870203 | -0.282506701626 | -2.491260584312 |
| H  | -3.210500492305 | -2.583414783055 | 0.181530136677  |

|    |                 |                 |                 |
|----|-----------------|-----------------|-----------------|
| H  | -4.338401299378 | 1.530254205675  | 1.289552454351  |
| H  | -3.243752894572 | 2.226525081420  | -1.604252094536 |
| H  | -1.327148273897 | 1.145436403213  | 1.899810888638  |
| H  | -0.986216397994 | -1.462212904323 | -1.505041067849 |
| H  | -2.242704797540 | -2.163968902394 | 1.339763080870  |
| H  | -4.270177652022 | 0.139484323246  | 2.045178699734  |
| H  | -2.065384537347 | 2.606210416870  | -0.633464163979 |
| H  | -0.344462658623 | 0.059537582370  | 1.250415619610  |
| H  | -5.151585133347 | -0.287579599807 | -1.099821497430 |
| Ru | 2.673165374671  | 0.004911489959  | 0.164853736661  |
| O  | 4.188777550001  | 0.801677860806  | -1.040430786273 |
| O  | 2.786268127822  | -1.617822232256 | -1.152087556285 |
| O  | 1.143616522321  | -0.791079843093 | 1.489658419746  |
| O  | 2.577079085379  | 1.623492067318  | 1.479562409549  |
| O  | 4.253314770639  | -0.718564962463 | 1.308411915231  |
| O  | 1.135527833216  | 0.898630774871  | -0.914697089200 |
| H  | 1.373845337908  | 1.470041953037  | -1.665844339928 |
| H  | 4.293837804828  | 1.769351777393  | -1.094948796457 |
| H  | 1.998775947961  | -2.148482657057 | -1.368217349327 |
| H  | 1.354992246912  | -0.615279001279 | 2.429399817689  |
| H  | 1.926457208389  | 2.320332025923  | 1.272685463592  |
| H  | 4.221980892876  | -1.584100314011 | 1.755408440933  |
| H  | 4.238351226383  | 0.445668965083  | -1.947847773376 |
| H  | 3.545383923084  | -2.226140375221 | -1.081350855630 |
| H  | 0.962459271217  | -1.749936918477 | 1.421308760595  |
| H  | 3.399078906173  | 2.050177426802  | 1.784724912072  |
| H  | 5.145978413076  | -0.584113573810 | 0.938159274863  |
| H  | 0.322423556131  | 0.389183279787  | -1.159708901991 |

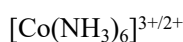

$$\Delta E_1^{\text{MM}} = -0.00292513 = (3260.86599396 - 1629.95474305 - 1630.90778227) \\ - (3261.35409649 - 1630.43992045 - 1630.90778227)$$

$$\Delta E_2^{\text{MM}} = -0.00291342 = (3260.85961495 - 1630.43992045 - 1630.41621415) \\ - (3261.35409649 - 1630.43992045 - 1630.90778227)$$

$$E'_1 = -3442.69936436 = (-3442.51023468) - (-1721.25767356) + (-1721.44387810) + (-0.00292513)$$

$$E'_2 = -3442.69936445 = (-3442.51023468) - (-1721.25766074) + (-1721.44387709) + (-0.00291342)$$

$G(\text{Def2-SV}(P)) = -3442.27490070$

|    |                 |                 |                 |
|----|-----------------|-----------------|-----------------|
| Co | 3.568130782296  | 0.133968334103  | 0.002149204446  |
| N  | 3.603009749406  | 1.698058524800  | -1.379235978629 |
| H  | 3.284634302783  | 2.591652205703  | -0.991641962276 |
| H  | 3.021335060349  | 1.527697607166  | -2.205775831212 |
| H  | 4.548051632295  | 1.874375912105  | -1.735525587529 |
| N  | 2.299293059102  | 1.199624812457  | 1.270830274133  |
| H  | 1.596809012181  | 0.588361828029  | 1.699054280127  |
| H  | 1.769344095065  | 1.939765103777  | 0.800398921546  |
| H  | 2.785586241610  | 1.653441590891  | 2.050461640323  |
| N  | 3.639395938895  | -1.432003198350 | 1.385937480205  |
| H  | 2.983468593978  | -2.192794761360 | 1.182885311929  |
| H  | 3.437041487997  | -1.137796710179 | 2.346877657558  |
| H  | 4.565906233196  | -1.869193113799 | 1.417060018084  |
| N  | 1.873600556772  | -0.648162936628 | -0.938017832711 |
| H  | 1.196743311631  | 0.073878211529  | -1.203285340212 |
| H  | 1.355500111886  | -1.311164205474 | -0.353430029368 |
| H  | 2.094362129090  | -1.154523902161 | -1.801101206341 |
| N  | 4.762578172921  | -1.024771502709 | -1.262852004766 |
| H  | 4.738846671379  | -0.712677975164 | -2.238753458929 |
| H  | 4.473798005961  | -2.008351439883 | -1.276594333058 |
| H  | 5.752556130876  | -1.032860006554 | -0.998669170441 |
| N  | 5.231729759436  | 0.983309578661  | 0.938043636839  |
| H  | 5.135346979414  | 1.993569347766  | 1.081274992852  |
| H  | 6.102581198758  | 0.863647063271  | 0.411294649921  |
| H  | 5.413832774822  | 0.584430723456  | 1.864287759871  |
| Co | -3.567658897670 | -0.129317564957 | -0.002855939139 |
| N  | -3.198616907967 | 1.011823993259  | -1.714390146482 |
| H  | -4.068970930156 | 1.299449232609  | -2.172870869691 |
| H  | -2.657624192316 | 0.519930910424  | -2.432359007662 |
| H  | -2.684854626054 | 1.878241230377  | -1.524643898606 |
| N  | -4.833683859855 | 1.387044209849  | 0.677141529952  |
| H  | -5.825896143347 | 1.202527779216  | 0.499986728308  |
| H  | -4.640644347632 | 2.293280169038  | 0.239065308279  |
| H  | -4.759324679349 | 1.541601020933  | 1.687618260189  |
| N  | -4.040956711215 | -1.235022644787 | 1.700992721871  |

|   |                 |                 |                 |
|---|-----------------|-----------------|-----------------|
| H | -3.745214442637 | -2.214863761191 | 1.647965895559  |
| H | -5.051551322830 | -1.256981017779 | 1.872223434223  |
| H | -3.624027641148 | -0.860915802044 | 2.559044792021  |
| N | -5.112623344926 | -1.072297744349 | -1.049017692972 |
| H | -5.945489277232 | -0.489704996266 | -1.180187465089 |
| H | -5.443189345333 | -1.927965622341 | -0.592063655504 |
| H | -4.823780445890 | -1.353647312975 | -1.991345608050 |
| N | -2.258308516902 | -1.640398017670 | -0.614370874865 |
| H | -1.618857475020 | -1.342205659591 | -1.357421212359 |
| H | -2.733256516549 | -2.473416707394 | -0.976280967088 |
| H | -1.658793022120 | -1.970667034878 | 0.148344105555  |
| N | -1.963451454813 | 0.774494653141  | 0.985627892681  |
| H | -2.213736857961 | 1.647496334994  | 1.460536508141  |
| H | -1.202975590717 | 1.017590033873  | 0.343545591274  |
| H | -1.538785412577 | 0.177086922139  | 1.701535790343  |

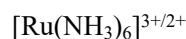

$$\Delta E_1^{\text{MM}} = -0.00295088 = (3252.58414206 - 1625.07077183 - 1627.51019818) \\ - (3252.51122754 - 1624.99490643 - 1627.51019818)$$

$$\Delta E_2^{\text{MM}} = -0.00293668 = (3252.54923814 - 1624.99490643 - 1627.55114545) \\ - (3252.51122754 - 1624.99490643 - 1627.51019818)$$

$$E'_1 = -867.29049198 = (-867.09789410) - (-433.55103603) + (-433.74068302) + (-0.00295088)$$

$$E'_2 = -867.29049195 = (-867.09789410) - (-433.55118214) + (-433.74084330) + (-0.00293668)$$

$$G(\text{Def2-SV(P)}) = -866.86696131$$

|    |                |                 |                 |
|----|----------------|-----------------|-----------------|
| Ru | 3.510336687685 | 0.088039151964  | -0.128177149946 |
| N  | 4.508883710001 | -0.076820897807 | -2.021402624646 |
| H  | 3.937195943539 | 0.265516155872  | -2.801171150457 |
| H  | 4.752723310637 | -1.041195764504 | -2.268581359037 |
| H  | 5.385427635753 | 0.452470997903  | -2.068407228127 |
| N  | 2.645396715292 | 1.971233119596  | -0.710021871790 |
| H  | 1.630820229881 | 1.937711807511  | -0.849394323016 |
| H  | 3.032043228522 | 2.347358296675  | -1.581725289447 |
| H  | 2.800644898215 | 2.701810883817  | -0.007324473225 |
| N  | 2.485785298044 | 0.234878107929  | 1.757982858716  |
| H  | 1.945848109314 | -0.604076296896 | 1.993564907061  |
| H  | 1.817730205310 | 1.011526115660  | 1.790411708824  |



|    |                 |                 |                 |
|----|-----------------|-----------------|-----------------|
| H  | 3.113710808554  | 0.384374049023  | 2.554841260912  |
| N  | 1.846345972985  | -1.008811585604 | -0.938380389580 |
| H  | 1.225182768746  | -0.434557313039 | -1.517277934641 |
| H  | 1.243948086103  | -1.421839671324 | -0.219668754391 |
| H  | 2.135158270420  | -1.786658165310 | -1.540226927411 |
| N  | 4.390625364907  | -1.768973670620 | 0.495407033154  |
| H  | 5.284665970733  | -1.976338625403 | 0.038477127657  |
| H  | 3.790511135752  | -2.580804530156 | 0.318578511821  |
| H  | 4.585780659326  | -1.792854289092 | 1.502165797280  |
| N  | 5.196043669373  | 1.183486214492  | 0.640421660605  |
| H  | 5.455231019638  | 1.975518009347  | 0.043165993177  |
| H  | 6.043475514571  | 0.613731326308  | 0.728482002173  |
| H  | 5.037139902810  | 1.587546394311  | 1.568971439288  |
| Ru | -3.519245869589 | -0.088959642997 | 0.130914770142  |
| N  | -3.995176864022 | 0.298067441937  | -1.933016676946 |
| H  | -4.970615072371 | 0.582452362441  | -2.068343391797 |
| H  | -3.856742704799 | -0.518229925876 | -2.537476719904 |
| H  | -3.432438861760 | 1.045964792380  | -2.350878374693 |
| N  | -4.653279650395 | 1.640382285659  | 0.715572928694  |
| H  | -5.668149181030 | 1.510572448820  | 0.658430571209  |
| H  | -4.451515318241 | 2.454580220648  | 0.125048828047  |
| H  | -4.464627491118 | 1.944725444283  | 1.676224905982  |
| N  | -3.087981214784 | -0.478805896091 | 2.201684097493  |
| H  | -2.721924960490 | -1.420943723185 | 2.372790808070  |
| H  | -3.916018479541 | -0.396790266044 | 2.800029128758  |
| H  | -2.393061857485 | 0.160775513405  | 2.599638857785  |
| N  | -5.272493453593 | -1.323303613045 | 0.267489521644  |
| H  | -6.045653372304 | -0.887845433144 | 0.780167856188  |
| H  | -5.091864108386 | -2.207471734739 | 0.755119581545  |
| H  | -5.656573845278 | -1.585325857337 | -0.645924703084 |
| N  | -2.353399498253 | -1.789835652151 | -0.489070402525 |
| H  | -1.714603319505 | -1.562807042933 | -1.257860008038 |
| H  | -2.920254484234 | -2.575160701389 | -0.824604674661 |
| H  | -1.759567648785 | -2.175283564785 | 0.251742731316  |
| N  | -1.734573581421 | 1.114768737954  | 0.021393399954  |
| H  | -1.838040407540 | 2.038525947759  | 0.453381921892  |

|   |                 |                |                 |
|---|-----------------|----------------|-----------------|
| H | -1.406051752756 | 1.291428952887 | -0.933060816016 |
| H | -0.946296381942 | 0.673181660804 | 0.504000609341  |

[Ru(NH<sub>3</sub>)<sub>5</sub>py]<sup>3+/2+</sup>

$\Delta E_1^{MM} = -0.00400124 = (3811.70168952 - 1904.96781037 - 1906.73872468)$   
 $- (3811.59593981 - 1904.85805941 - 1906.73872468)$

$\Delta E_2^{MM} = -0.00400202 = (3811.69008612 - 1904.85805941 - 1906.83687302)$   
 $- (3811.59593981 - 1904.85805941 - 1906.73872468)$

$E'_1 = -1250.35041792 = (-1250.15074153) - (-625.07367618) + (-625.26935132) + (-0.00400124)$

$E'_2 = -1250.35041773 = (-1250.15074153) - (-625.07380680) + (-625.26948098) + (-0.00400202)$

$G(\text{Def2-SV(P)}) = -1249.82699624$

|    |                 |                 |                 |
|----|-----------------|-----------------|-----------------|
| Ru | -4.529621865167 | -0.082186080665 | 0.018152907471  |
| N  | -4.077184017300 | -1.483391546839 | -1.546221804210 |
| H  | -4.358760319672 | -2.441944744293 | -1.316589328631 |
| H  | -3.075663129274 | -1.545669654179 | -1.754841890282 |
| H  | -4.535844279055 | -1.275121761667 | -2.438854705051 |
| N  | -6.523365105712 | -0.876650460543 | 0.086956221223  |
| H  | -6.850194413006 | -1.076142380209 | 1.037744527510  |
| H  | -6.618581844586 | -1.755730065062 | -0.431759130171 |
| H  | -7.223215093376 | -0.250556901211 | -0.324702586487 |
| N  | -3.949638726278 | -1.555422543366 | 1.471186646386  |
| H  | -2.943655935805 | -1.554279931153 | 1.666067680795  |
| H  | -4.161859784128 | -2.515328186417 | 1.180218672208  |
| H  | -4.408304127785 | -1.441175894461 | 2.380837446975  |
| N  | -5.043836452417 | 1.298641898047  | 1.582976020848  |
| H  | -4.506235819386 | 2.170651055593  | 1.530543472987  |
| H  | -4.906916192033 | 0.938542041944  | 2.532710616992  |
| H  | -6.027662364656 | 1.586455152945  | 1.549928473986  |
| N  | -5.165438182257 | 1.387678912946  | -1.416217227432 |
| H  | -5.379612897777 | 1.012489734400  | -2.345902939035 |
| H  | -4.465564777129 | 2.123348751210  | -1.560489293767 |
| H  | -6.012717072907 | 1.886428310882  | -1.125786695650 |
| C  | -0.045440388131 | 1.901761142613  | -0.126764700167 |
| C  | -0.645929906615 | 1.588438915394  | 1.090007615298  |
| C  | -1.900989159785 | 0.996226112811  | 1.085702567324  |
| N  | -2.570940330326 | 0.714023943950  | -0.048104115923 |

|    |                 |                 |                 |
|----|-----------------|-----------------|-----------------|
| C  | -1.976518664762 | 1.003935996216  | -1.222179843221 |
| C  | -0.723425852687 | 1.594532020525  | -1.304075755954 |
| H  | 0.935431717534  | 2.381294911877  | -0.158106600501 |
| H  | -0.153655684600 | 1.796412748327  | 2.041510948655  |
| H  | -2.389273878328 | 0.744368190982  | 2.029011484895  |
| H  | -2.526422228008 | 0.761170876477  | -2.134093511043 |
| H  | -0.292884711775 | 1.807199078850  | -2.283923727570 |
| Ru | 4.530079763643  | 0.086050139963  | 0.031643702242  |
| N  | 6.530556977854  | 0.878795593051  | 0.126865977621  |
| H  | 7.211704127449  | 0.332793441099  | -0.410548731656 |
| H  | 6.896686785138  | 0.915853191839  | 1.083412083367  |
| H  | 6.606215016229  | 1.833938709684  | -0.237856892531 |
| N  | 5.110919496290  | -1.241119551378 | -1.559628205114 |
| H  | 6.064780885013  | -1.600844658912 | -1.453020887466 |
| H  | 5.090365135057  | -0.812678347112 | -2.490423420954 |
| H  | 4.516974130411  | -2.075058737056 | -1.616165338284 |
| N  | 5.094834782683  | -1.431239123532 | 1.448574116988  |
| H  | 5.993403777428  | -1.867325404409 | 1.217235784461  |
| H  | 4.422125260640  | -2.204635855081 | 1.482066900554  |
| H  | 5.199099907223  | -1.102632478588 | 2.413929697154  |
| N  | 3.987956672105  | 1.430364351102  | 1.618850158199  |
| H  | 4.486551768166  | 2.324558088412  | 1.570276836182  |
| H  | 4.173597513547  | 1.071851130777  | 2.560705212779  |
| H  | 2.992888932223  | 1.675334526658  | 1.606828340923  |
| N  | 4.028322670129  | 1.606228324755  | -1.407254081292 |
| H  | 4.692434009594  | 1.656040009207  | -2.186834743630 |
| H  | 4.003668876925  | 2.549711662614  | -1.007421546389 |
| H  | 3.108334354006  | 1.474323378885  | -1.839030425558 |
| C  | 0.047796504721  | -1.907287806149 | -0.089010166079 |
| C  | 0.706190220292  | -1.576740680171 | -1.270855493147 |
| C  | 1.958655141758  | -0.982265523512 | -1.197240585380 |
| N  | 2.570676166001  | -0.709558901792 | -0.029409526447 |
| C  | 1.918707254918  | -1.013104043364 | 1.109219226604  |
| C  | 0.666359879788  | -1.611104369723 | 1.123140336726  |
| H  | -0.931522404838 | -2.391011147021 | -0.111863738635 |
| H  | 0.262186604853  | -1.775157690064 | -2.247774712146 |

|   |                |                 |                 |
|---|----------------|-----------------|-----------------|
| H | 2.494913912588 | -0.723600398327 | -2.112534974118 |
| H | 2.420624179052 | -0.773468545563 | 2.048427088019  |
| H | 0.190040665321 | -1.836737075188 | 2.078807066536  |

[Co(en)<sub>3</sub>]<sup>3+/2+</sup>

$$\Delta E_1^{\text{MM}} = -0.00276063 = (3931.63382252 - 1964.66871821 - 1966.96422761) - (3931.68481840 - 1964.71695346 - 1966.96422761)$$

$$\Delta E_2^{\text{MM}} = -0.00274591 = (3931.63289172 - 1964.71695346 - 1966.91504685) - (3931.68481840 - 1964.71695346 - 1966.96422761)$$

$$E'_1 = -3906.71804502 = (-3906.52964351) - (-1953.26639181) + (-1953.45203269) + (-0.00276063)$$

$$E'_2 = -3906.71804498 = (-3906.52964351) - (-1953.26615655) + (-1953.45181211) + (-0.00274591)$$

$$G(\text{Def2-SV(P)}) = -3906.06488154$$

|    |                 |                 |                 |
|----|-----------------|-----------------|-----------------|
| Co | -3.873543706532 | 0.067386073654  | -0.012046321930 |
| N  | -1.836110727345 | 0.440231967345  | 0.274149141893  |
| N  | -4.071599912227 | 1.612115531453  | 1.383109374027  |
| N  | -3.936565501707 | 1.359794569962  | -1.656336795930 |
| N  | -3.478028945329 | -1.363543349036 | -1.484070527367 |
| N  | -3.965119407180 | -1.379583819498 | 1.492005680101  |
| N  | -5.937718378917 | -0.256429266773 | -0.085362712638 |
| C  | -1.679758375583 | 1.734541153837  | 0.968903246210  |
| C  | -2.761281157465 | 1.845800588953  | 2.024797437389  |
| C  | -4.054646069174 | 0.539397125160  | -2.880509163367 |
| C  | -3.143563739002 | -0.663418879846 | -2.742721660837 |
| C  | -5.285036548973 | -2.042467340922 | 1.424356327066  |
| C  | -6.338085786359 | -0.993044263161 | 1.132054913703  |
| H  | -4.709410507640 | 2.029925250753  | -1.613258575634 |
| H  | -3.093513334404 | 1.938275850006  | -1.713866460320 |
| H  | -4.282377653849 | -1.977907550325 | -1.637915714143 |
| H  | -2.714800047357 | -1.994445365956 | -1.223812282585 |
| H  | -4.370893978665 | 2.461880155326  | 0.895886950340  |
| H  | -4.787907689378 | 1.458052699718  | 2.097418300719  |
| H  | -1.290421448649 | 0.436452971468  | -0.589946230068 |
| H  | -1.429852016742 | -0.306337111745 | 0.845881480145  |
| H  | -3.838413002308 | -0.959361065866 | 2.417028652810  |
| H  | -3.224675257384 | -2.082558615651 | 1.420339709146  |
| H  | -6.204820145382 | -0.796387962792 | -0.913129410639 |

|    |                 |                 |                 |
|----|-----------------|-----------------|-----------------|
| H  | -6.472814094332 | 0.613453636943  | -0.159904650384 |
| H  | -7.330700244232 | -1.455232852010 | 1.013514951208  |
| H  | -6.407608124231 | -0.275321832828 | 1.964542766086  |
| H  | -5.513092294509 | -2.578517498806 | 2.359053668468  |
| H  | -5.252300836511 | -2.788092285519 | 0.614651907328  |
| H  | -1.783303900789 | 2.541872524337  | 0.227036058919  |
| H  | -0.680270243473 | 1.832250916122  | 1.420977114295  |
| H  | -2.615079411952 | 1.078081005025  | 2.801119549683  |
| H  | -2.725148686280 | 2.828310914310  | 2.521147199840  |
| H  | -2.090663694679 | -0.343200776220 | -2.692396699067 |
| H  | -3.241555421000 | -1.331912548453 | -3.612333331823 |
| H  | -5.102903658749 | 0.216294302468  | -2.978942495498 |
| H  | -3.802395010154 | 1.121868222776  | -3.780611263788 |
| Co | 3.891531311702  | -0.069908494471 | 0.010985466454  |
| N  | 5.332444552514  | -1.331442827832 | 0.850889025043  |
| N  | 5.484960600220  | 0.475389237110  | -1.229805898164 |
| N  | 3.221995753148  | -1.582294462301 | -1.265407181307 |
| N  | 2.395626812097  | -0.823719584378 | 1.263107684026  |
| N  | 4.293321133399  | 1.506232947960  | 1.320258325210  |
| N  | 2.604870700791  | 1.328703371503  | -0.860082123512 |
| C  | 6.499924535439  | -1.393199349822 | -0.053779318328 |
| C  | 6.743673192462  | -0.012676893421 | -0.629241117826 |
| C  | 1.897202639294  | -2.030826647035 | -0.788064635866 |
| C  | 1.936219861460  | -2.121676779649 | 0.724421071946  |
| C  | 3.231604072329  | 2.523471804958  | 1.165950826970  |
| C  | 2.908306173021  | 2.666466014977  | -0.308285915167 |
| H  | 3.155246469624  | -1.280516020109 | -2.240991197334 |
| H  | 3.867532257340  | -2.377170911725 | -1.279782315058 |
| H  | 1.601378948519  | -0.183085297119 | 1.336332510527  |
| H  | 2.724381110861  | -0.939325153838 | 2.225437778444  |
| H  | 5.357054603491  | 0.043759875897  | -2.149929900762 |
| H  | 5.557164503531  | 1.477890954110  | -1.420384011232 |
| H  | 4.999842657927  | -2.277454300548 | 1.054537147633  |
| H  | 5.623047902168  | -0.957086859105 | 1.759084295198  |
| H  | 5.204097463040  | 1.929824094632  | 1.122044401006  |
| H  | 4.348582556277  | 1.210434523960  | 2.298581510502  |

|   |                |                 |                 |
|---|----------------|-----------------|-----------------|
| H | 1.625585084018 | 1.098151976449  | -0.677317250695 |
| H | 2.679746789463 | 1.345002682555  | -1.881020587598 |
| H | 2.068367049840 | 3.362612718424  | -0.458886173190 |
| H | 3.774133237224 | 3.076511199423  | -0.851039981823 |
| H | 3.539016502924 | 3.491281916393  | 1.592592942297  |
| H | 2.346476091946 | 2.184951688039  | 1.726700499067  |
| H | 6.273962536773 | -2.106670543261 | -0.861642037716 |
| H | 7.395385113850 | -1.762617674329 | 0.470324960576  |
| H | 7.042789169559 | 0.689117360558  | 0.165383530198  |
| H | 7.559058675720 | -0.037554060197 | -1.369471691141 |
| H | 2.648572099606 | -2.899444091051 | 1.041537404779  |
| H | 0.948194602322 | -2.396314997025 | 1.126248563452  |
| H | 1.147574379376 | -1.291607970711 | -1.110199474063 |
| H | 1.615783075432 | -2.999085647620 | -1.231193835824 |

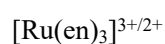

$$\Delta E_1^{\text{MM}} = -0.00272102 = (3919.45001371 - 1960.14005767 - 1959.30890249)$$

$$- (3919.27699143 - 1959.96431437 - 1959.30890249)$$

$$\Delta E_2^{\text{MM}} = -0.00270202 = (3919.44005606 - 1959.96431437 - 1959.47466914)$$

$$- (3919.27699143 - 1959.96431437 - 1959.30890249)$$

$$E'_1 = -1331.30142475 = (-1331.10707623) - (-665.55489989) + (-665.74652740) + (-0.00272102)$$

$$E'_2 = -1331.30142478 = (-1331.10707623) - (-665.55494792) + (-665.74659446) + (-0.00270202)$$

$$G(\text{Def2-SV(P)}) = -1330.64877477$$

|    |                 |                 |                 |
|----|-----------------|-----------------|-----------------|
| Ru | -3.907936323779 | 0.039055352007  | -0.026228322528 |
| N  | -1.856398292366 | 0.579343685478  | 0.314169709045  |
| N  | -4.197263128601 | 1.546071335675  | 1.480039348281  |
| N  | -3.971327727454 | 1.410658467065  | -1.680553092906 |
| N  | -3.458190410653 | -1.328738588752 | -1.620137250338 |
| N  | -3.960266515508 | -1.470344985755 | 1.504802040104  |
| N  | -5.984739479441 | -0.495978836245 | -0.147062934160 |
| C  | -1.804548308398 | 1.847403627495  | 1.080928074957  |
| C  | -2.896969226539 | 1.838569585826  | 2.131471696632  |
| C  | -4.048146904346 | 0.634221045265  | -2.942244298412 |
| C  | -3.118357309637 | -0.557882311930 | -2.841597012796 |
| C  | -5.219176305242 | -2.244316175782 | 1.373614635964  |
| C  | -6.351993858943 | -1.291245490255 | 1.050518621059  |

|    |                 |                 |                 |
|----|-----------------|-----------------|-----------------|
| H  | -4.766533171998 | 2.054229546338  | -1.632015479156 |
| H  | -3.149743243320 | 2.021688182983  | -1.710123434493 |
| H  | -4.239307278616 | -1.957977296082 | -1.826098154169 |
| H  | -2.681439658945 | -1.953399086323 | -1.385894303635 |
| H  | -4.558497749528 | 2.398746069815  | 1.041370214876  |
| H  | -4.891073607108 | 1.316010879633  | 2.195962971063  |
| H  | -1.293303709713 | 0.673103438730  | -0.533936366211 |
| H  | -1.396514816152 | -0.162709997549 | 0.849022144207  |
| H  | -3.906574986570 | -1.068668471458 | 2.445479021203  |
| H  | -3.164373417473 | -2.113156333994 | 1.454812700887  |
| H  | -6.197774829476 | -1.039813987716 | -0.988476641980 |
| H  | -6.595744563735 | 0.323519766101  | -0.210717742040 |
| H  | -7.291059447137 | -1.842734318086 | 0.886205335802  |
| H  | -6.519029353278 | -0.593801040496 | 1.885750290875  |
| H  | -5.434105717052 | -2.808849040858 | 2.294556083633  |
| H  | -5.086574736999 | -2.972713291119 | 0.558661878662  |
| H  | -1.959478713816 | 2.678428634513  | 0.375287901303  |
| H  | -0.816392646406 | 1.988902048819  | 1.547031808316  |
| H  | -2.703713722341 | 1.051780659252  | 2.877650584830  |
| H  | -2.928751952305 | 2.801041556961  | 2.665855188864  |
| H  | -2.072217871331 | -0.224447441977 | -2.756287237784 |
| H  | -3.192995805759 | -1.188945704094 | -3.740867289249 |
| H  | -5.088765874073 | 0.298315000634  | -3.072335951469 |
| H  | -3.788319955629 | 1.261278095694  | -3.809540800134 |
| Ru | 3.912579234808  | -0.035757615661 | 0.023214435901  |
| N  | 5.390399593571  | -1.387132807815 | 0.815558982568  |
| N  | 5.508165325155  | 0.341135062806  | -1.370027264551 |
| N  | 3.054461696095  | -1.655062899346 | -1.098357994359 |
| N  | 2.371885226191  | -0.623708291956 | 1.400584855784  |
| N  | 4.547754450789  | 1.647547938282  | 1.197789726440  |
| N  | 2.611962409327  | 1.461427141163  | -0.799388587289 |
| C  | 6.475029726540  | -1.559251411127 | -0.181235868612 |
| C  | 6.769766874394  | -0.223247896446 | -0.830903561701 |
| C  | 1.739608615120  | -2.008470006251 | -0.508123346027 |
| C  | 1.842676140211  | -1.951732394137 | 1.002779786785  |
| C  | 3.534375598428  | 2.723524512746  | 1.073785215240  |

|   |                |                 |                 |
|---|----------------|-----------------|-----------------|
| C | 3.080497297717 | 2.802295174540  | -0.369509791365 |
| H | 2.925940837190 | -1.429738740097 | -2.089171034869 |
| H | 3.658105901335 | -2.482298863079 | -1.102822614870 |
| H | 1.602570360323 | 0.050929319121  | 1.435443816261  |
| H | 2.712404920326 | -0.670696117695 | 2.365440147598  |
| H | 5.297079950499 | -0.107697619848 | -2.266894437463 |
| H | 5.654085991984 | 1.325506772870  | -1.609035120084 |
| H | 5.038850654389 | -2.307385706435 | 1.093738590137  |
| H | 5.782275461201 | -0.993517976373 | 1.676899858095  |
| H | 5.460481029394 | 2.008699815679  | 0.905733466391  |
| H | 4.670558423336 | 1.412003877139  | 2.187036562800  |
| H | 1.639262287042 | 1.337806290728  | -0.507252499914 |
| H | 2.576778869368 | 1.428165775060  | -1.822304766623 |
| H | 2.286342356450 | 3.555475985350  | -0.490032310464 |
| H | 3.918874642488 | 3.094786251326  | -1.020735372003 |
| H | 3.940942831548 | 3.690331228433  | 1.409533118515  |
| H | 2.688283380492 | 2.469933884990  | 1.731516631310  |
| H | 6.132694654817 | -2.283300728562 | -0.936906313987 |
| H | 7.381799046388 | -1.972423327732 | 0.287592795618  |
| H | 7.172657953709 | 0.484081490922  | -0.089171247638 |
| H | 7.523622874205 | -0.335619678419 | -1.625936198134 |
| H | 2.537979143721 | -2.720911200970 | 1.372892098871  |
| H | 0.862691682801 | -2.141935816622 | 1.467920293964  |
| H | 0.999004504864 | -1.279222848553 | -0.869968733365 |
| H | 1.413825918709 | -3.006836279456 | -0.840053837530 |

[Fe(bpy)<sub>3</sub>]<sup>3+/2+</sup>

$$\Delta E_1^{\text{MM}} = -0.00497619 = (5891.86548625 - 2946.21599025 - 2945.66463635) \\ - (5892.03809686 - 2946.38362467 - 2945.66463635)$$

$$\Delta E_2^{\text{MM}} = -0.00494282 = (5891.83838080 - 2946.38362467 - 2945.46986310) \\ - (5892.03809686 - 2946.38362467 - 2945.66463635)$$

$$E'_1 = -5495.85915442 = (-5495.65176133) - (-2747.82011491) + (-2748.02253181) + (-0.00497619)$$

$$E'_2 = -5495.85915455 = (-5495.65176133) - (-2747.82017404) + (-2748.02262444) + (-0.00494282)$$

$$G(\text{Def2-SV(P)}) = -5494.96263975$$

|    |                 |                 |                |
|----|-----------------|-----------------|----------------|
| Fe | -4.267531369281 | 0.669611604322  | 0.073403486406 |
| C  | -6.928587510489 | -2.996049809512 | 1.504697354968 |



|   |                 |                 |                 |
|---|-----------------|-----------------|-----------------|
| C | -2.688411687645 | 1.152916849902  | 2.549718793863  |
| C | -2.241593306457 | 0.868737052537  | 3.833562361252  |
| C | -2.769288696150 | -0.238498855961 | 4.492539548666  |
| C | -3.739938580401 | -1.006731162789 | 3.856319777408  |
| C | -4.150514706938 | -0.652742648006 | 2.573298946636  |
| C | -5.206348230103 | -1.354246497838 | 1.814712571385  |
| C | -5.940120596823 | -2.429531936261 | 2.305920682113  |
| C | -7.159532516322 | -2.468289147482 | 0.238569924031  |
| C | -6.386997814805 | -1.394614974283 | -0.187182972226 |
| H | -2.300814847910 | 2.012202362887  | 2.000019222099  |
| H | -1.488630362909 | 1.507692872504  | 4.297725134557  |
| H | -4.171404057469 | -1.870539182323 | 4.361778979248  |
| H | -5.751213836597 | -2.824416415268 | 3.304067133593  |
| H | -7.925861898759 | -2.876402824452 | -0.422128780219 |
| H | -6.532824422168 | -0.958962466230 | -1.176785978839 |
| N | -3.611146146951 | 0.405933314462  | 1.933047455606  |
| N | -5.431573153147 | -0.857567787637 | 0.578670120677  |
| C | -4.564972288612 | 0.431107741348  | -2.890234121059 |
| C | -5.112007841440 | 0.742385347173  | -4.128305070084 |
| C | -6.189316785997 | 1.620807764868  | -4.179302790905 |
| C | -6.685934401097 | 2.151060428404  | -2.991921311700 |
| C | -6.089413961878 | 1.791104400663  | -1.786839777495 |
| C | -6.535754400615 | 2.278016371689  | -0.466163800677 |
| C | -7.655606994520 | 3.080899347551  | -0.268950562703 |
| C | -7.990315031816 | 3.471150135101  | 1.024684771569  |
| C | -7.197850205303 | 3.045209315842  | 2.085725288308  |
| C | -6.096504021946 | 2.243578059156  | 1.814684857367  |
| C | -2.736147175363 | -1.806968559817 | -0.602789754255 |
| C | -1.686066326928 | -2.522063916184 | -1.164693087645 |
| C | -0.614111611656 | -1.818458532131 | -1.705060147256 |
| C | -0.620143597287 | -0.428836751229 | -1.641618244032 |
| C | -1.701691845573 | 0.222748585964  | -1.054268841035 |
| C | -1.819416062956 | 1.690251435217  | -0.934339031421 |
| C | -0.835447022416 | 2.587410955381  | -1.338248041862 |
| C | -1.051309308644 | 3.952355038547  | -1.166966771358 |
| C | -2.247940404349 | 4.382217017588  | -0.603306508255 |

|    |                 |                 |                 |
|----|-----------------|-----------------|-----------------|
| C  | -3.187877176270 | 3.429405982196  | -0.228302736009 |
| H  | -3.724043763104 | -0.259254590208 | -2.815926941380 |
| H  | -4.690751542173 | 0.297132253528  | -5.030850068912 |
| H  | -7.528516480057 | 2.841936028909  | -3.012318941024 |
| H  | -8.270620501775 | 3.397124526375  | -1.111322022228 |
| H  | -7.421296233596 | 3.323452017500  | 3.116747275068  |
| H  | -5.452703852438 | 1.894444710644  | 2.622892184899  |
| H  | -3.602214355571 | -2.326775358955 | -0.191692573540 |
| H  | -1.722171855486 | -3.612126010548 | -1.179018756879 |
| H  | 0.206878753502  | 0.140447924538  | -2.062026138020 |
| H  | 0.095508403295  | 2.235256685060  | -1.781883026822 |
| H  | -2.462152587407 | 5.440928241318  | -0.450302548963 |
| H  | -4.136062701270 | 3.727170686013  | 0.222524730070  |
| N  | -5.039033905012 | 0.942776026237  | -1.748486794056 |
| N  | -5.770867398274 | 1.873283543877  | 0.570799284399  |
| N  | -2.750012350286 | -0.468925094637 | -0.561349688809 |
| N  | -2.975633856265 | 2.118405042784  | -0.383864688167 |
| H  | -7.514323030996 | -3.841060625757 | 1.872821500301  |
| H  | -2.435843691160 | -0.501005754027 | 5.498786666366  |
| H  | -0.286742993309 | 4.669452669228  | -1.473520470381 |
| H  | 0.221174216966  | -2.346883804272 | -2.170402747155 |
| H  | -6.644110369146 | 1.893747007809  | -5.133975642468 |
| H  | -8.866128296063 | 4.100170092368  | 1.198037296184  |
| Fe | 4.271389037086  | -0.670403518253 | -0.073830936095 |
| C  | 8.640245081870  | 0.872716597097  | -1.138464308904 |
| C  | 4.500960371385  | -0.818369215225 | 2.900406010861  |
| C  | 5.121479979255  | -0.613025748824 | 4.126016318378  |
| C  | 6.408886537577  | -0.086454229717 | 4.141399074805  |
| C  | 7.032756272943  | 0.209924280883  | 2.932768339023  |
| C  | 6.350298601157  | -0.024451429763 | 1.742268266513  |
| C  | 6.912491954088  | 0.235548443585  | 0.401541544355  |
| C  | 8.213010038722  | 0.675766677867  | 0.171757253474  |
| C  | 7.756762831930  | 0.620658395777  | -2.183086220892 |
| C  | 6.473706380894  | 0.184047944292  | -1.879277037216 |
| H  | 3.495494977549  | -1.238364764923 | 2.852970803810  |
| H  | 4.593528471277  | -0.866245807450 | 5.046598287988  |

|   |                 |                 |                 |
|---|-----------------|-----------------|-----------------|
| H | 8.041741953501  | 0.621765554293  | 2.925386588978  |
| H | 8.894393688956  | 0.860665533140  | 1.002028349325  |
| H | 8.046967276347  | 0.757285371014  | -3.225918545105 |
| H | 5.753444561516  | -0.017724827671 | -2.672994558338 |
| N | 5.097865898214  | -0.530328344009 | 1.738364287610  |
| N | 6.060262066314  | 0.002386511878  | -0.619896916442 |
| C | 2.897349657928  | 0.108608655166  | -2.595920703538 |
| C | 2.367090850943  | -0.112176592833 | -3.860430877412 |
| C | 2.528978085633  | -1.367251445346 | -4.441085568509 |
| C | 3.236347107559  | -2.346879576148 | -3.750432095740 |
| C | 3.751415705557  | -2.049306514202 | -2.490880269718 |
| C | 4.558728410980  | -2.984268395140 | -1.680167481442 |
| C | 4.940308629235  | -4.255035621426 | -2.099497096020 |
| C | 5.719918856385  | -5.040556610390 | -1.254021750423 |
| C | 6.099956117323  | -4.532380211634 | -0.016248104049 |
| C | 5.681063641252  | -3.255316404012 | 0.337030892471  |
| C | 4.061678178882  | 2.300880114514  | 0.062780874449  |
| C | 3.453186898600  | 3.509360051819  | 0.381122788955  |
| C | 2.188864983582  | 3.486805830120  | 0.959942311223  |
| C | 1.577097647503  | 2.259340327584  | 1.200606927933  |
| C | 2.243403527286  | 1.089143828021  | 0.849700501759  |
| C | 1.691425705995  | -0.267681329659 | 1.043196619959  |
| C | 0.463071373917  | -0.534688937577 | 1.643082946575  |
| C | 0.040587878616  | -1.853627028610 | 1.773569128433  |
| C | 0.853538834618  | -2.872730060377 | 1.287393833484  |
| C | 2.070601517326  | -2.534340320545 | 0.709799737024  |
| H | 2.792569248650  | 1.078895711066  | -2.107718489922 |
| H | 1.833945005495  | 0.691384820782  | -4.371102519696 |
| H | 3.383340413007  | -3.330698028632 | -4.195389415282 |
| H | 4.640403280254  | -4.635108724697 | -3.076087136949 |
| H | 6.712833792599  | -5.110103654586 | 0.677281417317  |
| H | 5.953218684655  | -2.825390850333 | 1.302378452562  |
| H | 5.051099763396  | 2.278633089781  | -0.397382476665 |
| H | 3.972290236901  | 4.446170674398  | 0.173546145005  |
| H | 0.588759324523  | 2.224617141862  | 1.657862549078  |
| H | -0.157667442807 | 0.276450874140  | 2.020004411125  |

|   |                 |                 |                 |
|---|-----------------|-----------------|-----------------|
| H | 0.560973669813  | -3.921360816810 | 1.355134607796  |
| H | 2.741592985419  | -3.310103590788 | 0.339227028482  |
| N | 3.560087085500  | -0.839433568997 | -1.924327940798 |
| N | 4.925874545701  | -2.504613693598 | -0.471740370358 |
| N | 3.469702192707  | 1.122634127225  | 0.285266424811  |
| N | 2.485117022464  | -1.266084429535 | 0.603006101533  |
| H | 9.657351066696  | 1.217415797923  | -1.337065905942 |
| H | 6.928913388285  | 0.092782977783  | 5.084890562369  |
| H | -0.915938734541 | -2.083055603036 | 2.248533332683  |
| H | 1.676610204909  | 4.414421484688  | 1.224464300671  |
| H | 2.116441786454  | -1.582739959654 | -5.428953763672 |
| H | 6.028319636919  | -6.040671448987 | -1.566304769989 |

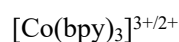

$$\Delta E_1^{\text{MM}} = -0.00651924 = (5893.93355501 - 2947.20758379 - 2946.74067446)$$

$$- (5893.89176814 - 2947.15927768 - 2946.74067446)$$

$$\Delta E_2^{\text{MM}} = -0.00593131 = (5893.92332160 - 2947.15927768 - 2946.77815922)$$

$$- (5893.89176814 - 2947.15927768 - 2946.74067446)$$

$$E'_1 = -5733.94673429 = (-5733.76311764) - (-2866.87609765) + (-2867.05319506) + (-0.00651924)$$

$$E'_2 = -5733.94673528 = (-5733.76311764) - (-2866.87568249) + (-2867.05336882) + (-0.00593131)$$

$$G(\text{Def2-SV(P)}) = -5494.96263975$$

|    |                 |                 |                 |
|----|-----------------|-----------------|-----------------|
| Co | -4.224691311278 | 0.561805332032  | 0.091775640689  |
| C  | -6.813372512285 | -3.148729485464 | 1.446184210879  |
| C  | -2.699153214180 | 1.076148486099  | 2.674633305181  |
| C  | -2.269777835371 | 0.767552718724  | 3.960178762719  |
| C  | -2.771475445683 | -0.379549986805 | 4.569745360676  |
| C  | -3.700642545410 | -1.160932390456 | 3.887877049504  |
| C  | -4.096700938581 | -0.775928894265 | 2.608184728447  |
| C  | -5.122812256049 | -1.481993240976 | 1.809033690650  |
| C  | -5.850276303587 | -2.573926737884 | 2.272107247202  |
| C  | -7.026438860616 | -2.613563061014 | 0.180699548001  |
| C  | -6.262889021991 | -1.523380543071 | -0.218339579105 |
| H  | -2.330941694760 | 1.964921672635  | 2.157149588023  |
| H  | -1.550089506028 | 1.415730258429  | 4.462759662479  |
| H  | -4.108095888951 | -2.056696955429 | 4.355997539075  |
| H  | -5.677653798399 | -2.974962423301 | 3.270654878598  |

|   |                 |                 |                 |
|---|-----------------|-----------------|-----------------|
| H | -7.771979223258 | -3.026633467027 | -0.500257956826 |
| H | -6.394566378056 | -1.079348420290 | -1.205707764865 |
| N | -3.578674048676 | 0.316821015335  | 2.016525337363  |
| N | -5.334407507516 | -0.977796404367 | 0.573201288734  |
| C | -4.506065404996 | 0.346930372886  | -2.933477822931 |
| C | -5.018629460801 | 0.704992707331  | -4.174858530040 |
| C | -6.077658129725 | 1.605739667386  | -4.220382870125 |
| C | -6.591834841671 | 2.109457112519  | -3.028206418492 |
| C | -6.028186451330 | 1.699679270073  | -1.822307202923 |
| C | -6.502861044983 | 2.152313405934  | -0.494852459699 |
| C | -7.637689964972 | 2.937140495479  | -0.307630930079 |
| C | -8.009507869184 | 3.297875626149  | 0.984551676333  |
| C | -7.238779737544 | 2.861558301797  | 2.056959116346  |
| C | -6.119982722900 | 2.080653220247  | 1.796049805103  |
| C | -2.664267432605 | -1.887295311744 | -0.631538722458 |
| C | -1.602912178352 | -2.568498835861 | -1.214541653033 |
| C | -0.546980054312 | -1.831213431188 | -1.741109345974 |
| C | -0.581269739027 | -0.442855494217 | -1.652366429272 |
| C | -1.673246907354 | 0.172067727825  | -1.045245954628 |
| C | -1.820817076768 | 1.633020384249  | -0.887835107231 |
| C | -0.858783201300 | 2.560316908311  | -1.273656800819 |
| C | -1.093902296736 | 3.915266313923  | -1.053062515096 |
| C | -2.287653121191 | 4.304662682155  | -0.456439571803 |
| C | -3.208180073357 | 3.324436282781  | -0.103735050512 |
| H | -3.679422726173 | -0.361913134732 | -2.858050057573 |
| H | -4.587148756242 | 0.279134869554  | -5.082053955553 |
| H | -7.419581072453 | 2.818311480868  | -3.048064246748 |
| H | -8.237942137623 | 3.260546291582  | -1.157804020271 |
| H | -7.490989710713 | 3.116142471313  | 3.087440119042  |
| H | -5.489402263015 | 1.722879103928  | 2.610990486856  |
| H | -3.516497392233 | -2.433338861767 | -0.225787973812 |
| H | -1.616845396665 | -3.658340465580 | -1.253637433521 |
| H | 0.232699658720  | 0.151708896223  | -2.064990957517 |
| H | 0.071980328151  | 2.237406653445  | -1.739010011985 |
| H | -2.516921827799 | 5.353166465215  | -0.261240840004 |
| H | -4.154216939664 | 3.592283287683  | 0.368789370278  |

|    |                 |                 |                 |
|----|-----------------|-----------------|-----------------|
| N  | -4.996989338709 | 0.833983958807  | -1.791713092225 |
| N  | -5.760603945387 | 1.740893854214  | 0.554167283117  |
| N  | -2.700592916753 | -0.552040941387 | -0.556123734297 |
| N  | -2.978660676911 | 2.024179403853  | -0.311558073635 |
| H  | -7.393417819712 | -4.005602935867 | 1.795332724548  |
| H  | -2.448092070294 | -0.664801619931 | 5.573063137512  |
| H  | -0.345598634346 | 4.655217816386  | -1.345030255353 |
| H  | 0.298082167674  | -2.332378417792 | -2.218485387048 |
| H  | -6.505560345421 | 1.917455724275  | -5.175726873808 |
| H  | -8.898031661401 | 3.911738490302  | 1.147546325687  |
| Co | 4.231366779531  | -0.583975210894 | -0.089517927302 |
| C  | 8.770263566573  | 0.561092710139  | -1.168721603256 |
| C  | 4.475065215861  | -0.722627313786 | 2.868183067535  |
| C  | 5.104058722298  | -0.533964491642 | 4.092167502488  |
| C  | 6.421424688529  | -0.088431532123 | 4.100795533939  |
| C  | 7.065199050693  | 0.141963279333  | 2.888177831319  |
| C  | 6.374053477133  | -0.072636173018 | 1.698642644130  |
| C  | 6.971643911396  | 0.119389008770  | 0.357409828763  |
| C  | 8.313393185595  | 0.423483584363  | 0.139880354365  |
| C  | 7.877600985806  | 0.388579337484  | -2.221856041462 |
| C  | 6.553173125624  | 0.087652567168  | -1.925329258229 |
| H  | 3.444712746523  | -1.076960193842 | 2.825685914271  |
| H  | 4.558754383466  | -0.735951961450 | 5.015277335311  |
| H  | 8.097575894911  | 0.490762158234  | 2.876979615837  |
| H  | 9.004431940854  | 0.544658648067  | 0.974079901638  |
| H  | 8.192405455186  | 0.483726394012  | -3.262309019784 |
| H  | 5.818937511138  | -0.051459554215 | -2.721590892358 |
| N  | 5.091317414974  | -0.494230453449 | 1.703975793453  |
| N  | 6.116796058082  | -0.036264771997 | -0.670443169371 |
| C  | 2.949753387593  | 0.312283611016  | -2.616649031422 |
| C  | 2.422962596344  | 0.129859204193  | -3.889306522857 |
| C  | 2.480743241136  | -1.138824364254 | -4.458962335788 |
| C  | 3.081470709335  | -2.174093081331 | -3.747720820032 |
| C  | 3.600758369670  | -1.913790691172 | -2.481903125157 |
| C  | 4.307217759573  | -2.909668193024 | -1.650604214890 |
| C  | 4.564744435475  | -4.218400543957 | -2.045782179502 |

|   |                 |                 |                 |
|---|-----------------|-----------------|-----------------|
| C | 5.263538284867  | -5.060942624893 | -1.184462585198 |
| C | 5.689340636854  | -4.570329730742 | 0.044968814876  |
| C | 5.394208593935  | -3.253157728785 | 0.376097834830  |
| C | 4.244970452342  | 2.363371384413  | -0.028031459064 |
| C | 3.733852539366  | 3.626102478070  | 0.246919715355  |
| C | 2.473242074980  | 3.722348142080  | 0.825812290383  |
| C | 1.770081078708  | 2.555156423925  | 1.112540909509  |
| C | 2.342428022995  | 1.323363960374  | 0.807748566539  |
| C | 1.675394744955  | 0.025748795637  | 1.058355384517  |
| C | 0.444435540487  | -0.102139973731 | 1.697907395246  |
| C | -0.096348061626 | -1.371105137504 | 1.880999602472  |
| C | 0.604210068365  | -2.479179886455 | 1.415120312162  |
| C | 1.835050262192  | -2.273268864140 | 0.800749353177  |
| H | 2.918120375266  | 1.291622782580  | -2.137062904280 |
| H | 1.971679773753  | 0.974386316086  | -4.412323133070 |
| H | 3.144018127729  | -3.171348207820 | -4.182921344107 |
| H | 4.230429373844  | -4.584220153901 | -3.016529646606 |
| H | 6.243233021537  | -5.191582989927 | 0.750302257419  |
| H | 5.705196588598  | -2.835437826957 | 1.334357130517  |
| H | 5.227149118297  | 2.247379211212  | -0.488634397882 |
| H | 4.323822496882  | 4.511041006640  | 0.004367136018  |
| H | 0.780138400012  | 2.614464120658  | 1.565602388876  |
| H | -0.081363693586 | 0.777945724547  | 2.064273162439  |
| H | 0.214426604029  | -3.491771824880 | 1.527168249706  |
| H | 2.424766083063  | -3.118338279088 | 0.439762524517  |
| N | 3.513330551123  | -0.686053879091 | -1.929206473412 |
| N | 4.716455172569  | -2.448563817425 | -0.448243503736 |
| N | 3.564931658486  | 1.244245896998  | 0.240302452382  |
| N | 2.355887512800  | -1.054903204510 | 0.638564934977  |
| H | 9.819516675053  | 0.797140181668  | -1.359350407982 |
| H | 6.949735375083  | 0.078666534719  | 5.041954848716  |
| H | -1.057144295339 | -1.496248226434 | 2.387065049148  |
| H | 2.033897991718  | 4.695829218201  | 1.053966758634  |
| H | 2.067465604510  | -1.324381411281 | -5.452561902117 |
| H | 5.473986260616  | -6.091511405298 | -1.478399049495 |

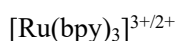

$$\Delta E_1^{\text{MM}} = -0.00582571 = (5873.26201520 - 2937.73456527 - 2935.54212263)$$

$$- (5873.65823693 - 2938.12496128 - 2935.54212263)$$

$$\Delta E_2^{\text{MM}} = -0.00533916 = (5873.27164958 - 2938.12496128 - 2935.16087443)$$

$$- (5873.65823693 - 2938.12496128 - 2935.54212263)$$

$$E'_1 = -3158.53999257 = (-3158.32426459) - (-1579.15608269) + (-1579.36598496) + (-0.00582571)$$

$$E'_2 = -3158.53999267 = (-3158.32426459) - (-1579.15593882) + (-1579.36632774) + (-0.00533916)$$

$$G(\text{Def2-SV(P)}) = -5494.96263975$$

|    |                 |                 |                 |
|----|-----------------|-----------------|-----------------|
| Ru | -4.299861001233 | 0.601235307592  | 0.077220758899  |
| C  | -6.935903982017 | -3.206007459038 | 1.506519246750  |
| C  | -2.745433749266 | 0.982360019117  | 2.681284657811  |
| C  | -2.319662587143 | 0.669007940581  | 3.964529824603  |
| C  | -2.843472567431 | -0.464764817932 | 4.581408847097  |
| C  | -3.793333262614 | -1.226962396981 | 3.908335052835  |
| C  | -4.190827724242 | -0.846738115277 | 2.627651428109  |
| C  | -5.235907035163 | -1.542845681825 | 1.846219188443  |
| C  | -5.943073722540 | -2.648628111431 | 2.308464428011  |
| C  | -7.202391827105 | -2.640692258509 | 0.263596456580  |
| C  | -6.458029682663 | -1.540206641894 | -0.140378179000 |
| H  | -2.364885749284 | 1.859766797972  | 2.154612353892  |
| H  | -1.584252076171 | 1.303983191513  | 4.460786374382  |
| H  | -4.221895474075 | -2.107521990631 | 4.385954186418  |
| H  | -5.730308868193 | -3.075933752353 | 3.288028027533  |
| H  | -7.974547551436 | -3.040520799213 | -0.395161146165 |
| H  | -6.623989330180 | -1.070178255756 | -1.111407016650 |
| N  | -3.645472746615 | 0.235754043314  | 2.026772023685  |
| N  | -5.496325253537 | -1.011889102219 | 0.627219395739  |
| C  | -4.659661562061 | 0.477238769393  | -2.959879770535 |
| C  | -5.232441433955 | 0.791493032144  | -4.184677386918 |
| C  | -6.333419151313 | 1.641847108586  | -4.206901438449 |
| C  | -6.826876142684 | 2.143923695107  | -3.006304508989 |
| C  | -6.208405716473 | 1.786096719121  | -1.811209613322 |
| C  | -6.657964628081 | 2.252491541613  | -0.482250806264 |
| C  | -7.774518298231 | 3.059593227646  | -0.280447634651 |
| C  | -8.121670030202 | 3.432105857106  | 1.014936820903  |
| C  | -7.346315578699 | 2.986009575953  | 2.080978618992  |



|    |                 |                 |                 |
|----|-----------------|-----------------|-----------------|
| C  | -6.247514344146 | 2.181874714951  | 1.812748050407  |
| C  | -2.649840400771 | -1.870104768256 | -0.658573797648 |
| C  | -1.590385026280 | -2.567627324212 | -1.221325798230 |
| C  | -0.522147033616 | -1.846203491737 | -1.746470865972 |
| C  | -0.545251463916 | -0.456968405343 | -1.679351352087 |
| C  | -1.637683993485 | 0.183420910315  | -1.098629417667 |
| C  | -1.761323677500 | 1.652124587104  | -0.974504737117 |
| C  | -0.777204551395 | 2.548364612807  | -1.381570254097 |
| C  | -0.982928836159 | 3.914199857358  | -1.206269017956 |
| C  | -2.172552694076 | 4.351709420225  | -0.633730562116 |
| C  | -3.118216259770 | 3.405642467706  | -0.258466692969 |
| H  | -3.798782577332 | -0.190624855590 | -2.898838692389 |
| H  | -4.813445386105 | 0.370474900745  | -5.099720856852 |
| H  | -7.688195799776 | 2.811282611248  | -3.008994730095 |
| H  | -8.378237300434 | 3.396236346022  | -1.122798931209 |
| H  | -7.581898750091 | 3.251429516207  | 3.112549038108  |
| H  | -5.609797994764 | 1.811306408736  | 2.617087342807  |
| H  | -3.513797269932 | -2.395549374455 | -0.249252076887 |
| H  | -1.612025593979 | -3.657746495341 | -1.243193535785 |
| H  | 0.281216135864  | 0.121685812210  | -2.088339957005 |
| H  | 0.149275757365  | 2.193370434616  | -1.831370634920 |
| H  | -2.378387534705 | 5.411434444894  | -0.477013241963 |
| H  | -4.066793634439 | 3.703284295140  | 0.192660573059  |
| N  | -5.134481092919 | 0.961181998020  | -1.804520633129 |
| N  | -5.910313945837 | 1.829629160590  | 0.564460122503  |
| N  | -2.676741715460 | -0.530502346310 | -0.608333997308 |
| N  | -2.914888884080 | 2.092297549303  | -0.419110905893 |
| H  | -7.498262872536 | -4.073959080077 | 1.857059842619  |
| H  | -2.522641162915 | -0.752424166156 | 5.584738806255  |
| H  | -0.215443551552 | 4.626526081194  | -1.516446292637 |
| H  | 0.324798446461  | -2.362208047296 | -2.204112026165 |
| H  | -6.810011530178 | 1.914839377832  | -5.150795673623 |
| H  | -8.995180851367 | 4.064850358699  | 1.185998691516  |
| Ru | 4.306571056001  | -0.591551261419 | -0.061732799135 |
| C  | 8.879599623141  | 0.658021420175  | -1.081279611218 |
| C  | 4.614465022919  | -0.681350753151 | 2.984531438271  |

|   |                 |                 |                 |
|---|-----------------|-----------------|-----------------|
| C | 5.266031951986  | -0.526369015802 | 4.200555281512  |
| C | 6.597254261967  | -0.121402040253 | 4.196339167735  |
| C | 7.230995091596  | 0.109373954916  | 2.979009758141  |
| C | 6.519818345590  | -0.067203751476 | 1.794292749121  |
| C | 7.099572247633  | 0.142286730150  | 0.449770710540  |
| C | 8.427891970730  | 0.496614980173  | 0.225171451101  |
| C | 7.992695358210  | 0.458459669307  | -2.135036153836 |
| C | 6.682113684385  | 0.106531933881  | -1.842936995432 |
| H | 3.572177834496  | -1.002124873535 | 2.943468573675  |
| H | 4.728550362314  | -0.722694520425 | 5.129451477077  |
| H | 8.273703118282  | 0.425511601349  | 2.960471686393  |
| H | 9.113190513469  | 0.644607988210  | 1.059394276964  |
| H | 8.302390432365  | 0.571867788951  | -3.174990279801 |
| H | 5.950479401495  | -0.054961784456 | -2.636515293417 |
| N | 5.223230411283  | -0.457161605518 | 1.812793849992  |
| N | 6.246195741249  | -0.042366523062 | -0.584921676626 |
| C | 2.952510748756  | 0.181427420093  | -2.690237574502 |
| C | 2.425115664916  | -0.024958134105 | -3.957461385948 |
| C | 2.522774249210  | -1.295084452205 | -4.520520526600 |
| C | 3.164711464896  | -2.304140220211 | -3.809347017542 |
| C | 3.684495264143  | -2.025725978799 | -2.545977459358 |
| C | 4.423846259449  | -3.008356603464 | -1.722974188450 |
| C | 4.705104545116  | -4.308926102377 | -2.133450673382 |
| C | 5.434406359012  | -5.146097009688 | -1.293470225453 |
| C | 5.869637312935  | -4.661778779412 | -0.063889230147 |
| C | 5.553088908847  | -3.355756435318 | 0.286248731087  |
| C | 4.218919954022  | 2.464331248965  | 0.064837305447  |
| C | 3.665401183249  | 3.711742997833  | 0.325257774724  |
| C | 2.384232635369  | 3.773676070531  | 0.864000851121  |
| C | 1.701514903522  | 2.589084467982  | 1.126223541676  |
| C | 2.312489464860  | 1.371559809712  | 0.836624703300  |
| C | 1.672986434562  | 0.057194017086  | 1.065290354177  |
| C | 0.427595492514  | -0.100780445348 | 1.670043535469  |
| C | -0.094724995790 | -1.377736213951 | 1.841900448432  |
| C | 0.639530382738  | -2.472917574326 | 1.397181324103  |
| C | 1.878075576078  | -2.247974838302 | 0.810714522559  |

|   |                 |                 |                 |
|---|-----------------|-----------------|-----------------|
| H | 2.897686146893  | 1.159440454537  | -2.208031941881 |
| H | 1.942059557941  | 0.800398753474  | -4.482726873886 |
| H | 3.258282476043  | -3.299370043230 | -4.243068755223 |
| H | 4.364875883343  | -4.674064986999 | -3.102236663744 |
| H | 6.446976855587  | -5.280732442584 | 0.624471464494  |
| H | 5.865694876462  | -2.935068963882 | 1.243882317293  |
| H | 5.219070084473  | 2.368105439896  | -0.362161130092 |
| H | 4.238533624388  | 4.613328814561  | 0.104390257052  |
| H | 0.696625876669  | 2.624077685962  | 1.547639955496  |
| H | -0.124149722897 | 0.770095793012  | 2.019027102000  |
| H | 0.267044794618  | -3.492738778237 | 1.500933382428  |
| H | 2.493968281166  | -3.079176665005 | 0.463630277349  |
| N | 3.554146165824  | -0.795526280317 | -1.998454764526 |
| N | 4.844259204595  | -2.553871884704 | -0.518551747590 |
| N | 3.557242421598  | 1.325969490185  | 0.307563444717  |
| N | 2.385841448633  | -1.017201010496 | 0.659381486328  |
| H | 9.918756874409  | 0.935819498274  | -1.270239388903 |
| H | 7.143640669901  | 0.014509633905  | 5.132103648940  |
| H | -1.067224213299 | -1.519416171567 | 2.320042532022  |
| H | 1.913486880663  | 4.735143773543  | 1.080169447661  |
| H | 2.109424359031  | -1.500526755930 | -5.510135446269 |
| H | 5.661359495864  | -6.168417244822 | -1.603421288641 |

**5. Cartesian coordinates and energies of MESX geometries by EDEEL with metal-metal distance fixed to  $r_{DA}(\text{ini})$  at the U $\omega$ B97X-D/Def2-SV(P) level**

The MESX geometries by EDEEL with metal-metal distance fixed to  $r_{DA}(\text{ini})$  and energy components in these geometries are presented below. These energy components are:

$$V_{11} = E_{n+m}^C - E_n^D + E_{n+1}^D$$

$$V_{22} = E_{n+m}^C - E_m^A + E_{m+1}^A$$

In the following, energy values at the U $\omega$ B97X-D/Def2-SV(P) level are given in Hartree. Note that the Gibbs energy values are before adding the entropy correction of  $-4.3$  kcal/mol.

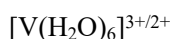

$$V_{11}(\text{Def2-SV(P)}) = -2803.297414124407624$$

$$= (-2803.085572666943790) - (-1401.540601727514968) + (-1401.752443184979029)$$

$$V_{22}(\text{Def2-SV(P)}) = -2803.297414110872523$$

$$= (-2803.085572666943790) - (-1401.539710866888981) + (-1401.751552310817942)$$

$$G(\text{Def2-SV(P)}) = -2803.055279092743$$

$$E(\text{Def2-SV(P)}) = -2803.306609364252836$$

5 6

|   |                 |                 |                 |
|---|-----------------|-----------------|-----------------|
| V | -2.677379515715 | -0.066131263419 | -0.060739331285 |
| O | -1.203046867012 | -1.420457733580 | -0.891102140834 |
| O | -2.559959758203 | -1.114777578517 | 1.718571875567  |
| O | -4.120016492462 | 1.219721555709  | 0.652560150214  |
| O | -2.795695980336 | 0.950840569793  | -1.855176434022 |
| O | -1.169630376153 | 1.154263894100  | 0.603425397973  |
| O | -4.204719716966 | -1.272121356885 | -0.748125108700 |
| H | -4.199135804998 | -2.236963187553 | -0.880085446935 |
| H | -1.398178423866 | -1.830961723984 | -1.757829676327 |
| H | -3.115943164543 | -1.889095959948 | 1.919091442451  |
| H | -4.477949581528 | 1.942400605704  | 0.106430129128  |
| H | -3.181951384555 | 0.558683546583  | -2.658526348414 |
| H | -1.287808208000 | 2.111897350238  | 0.736719796424  |
| H | -0.953012326399 | -2.152608824053 | -0.290826725462 |
| H | -2.272992160610 | -0.721351826995 | 2.562051767730  |
| H | -4.267611524096 | 1.433426411085  | 1.590800633358  |
| H | -2.244234360594 | 1.710876500571  | -2.112449670864 |
| H | -0.345067067150 | 0.873348219596  | 1.064827835173  |
| H | -5.130826482385 | -0.971452295735 | -0.715977113516 |

|   |                |                 |                 |
|---|----------------|-----------------|-----------------|
| V | 2.672290522087 | 0.120317552525  | 0.044332162557  |
| O | 4.079112999590 | 0.137105162720  | -1.460542651757 |
| O | 2.621991566794 | -1.948503815325 | 0.143631367549  |
| O | 1.243004444237 | 0.181357923588  | 1.674319013608  |
| O | 2.715977457531 | 2.178075591612  | -0.061442126973 |
| O | 4.287752533597 | 0.094961300062  | 1.316618192772  |
| O | 1.122772127249 | 0.064328530243  | -1.279414667665 |
| H | 1.168468218007 | 0.462100312970  | -2.167418702804 |
| H | 4.186769454002 | 0.889553683478  | -2.069644231803 |
| H | 2.192938157283 | -2.515754669609 | -0.521491984905 |
| H | 1.461957616870 | 0.766288574544  | 2.427860264722  |
| H | 1.939607985335 | 2.753518817066  | -0.182976217813 |
| H | 4.330090853069 | -0.173949914098 | 2.251567512623  |
| H | 4.428240747619 | -0.664124483895 | -1.889878544774 |
| H | 3.339862288159 | -2.459431608441 | 0.559480802622  |
| H | 1.044863138076 | -0.697188357060 | 2.059153815475  |
| H | 3.464598093192 | 2.723551755633  | 0.239438565599  |
| H | 5.193201441932 | 0.245557509669  | 0.989619398437  |
| H | 0.306962448018 | -0.486635437320 | -1.222178708070 |

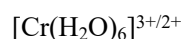

$$V_{11}(\text{Def2-SV(P)}) = -3004.140574157818264$$

$$= (-3003.929446892889246) - (-1501.960164617147029) + (-1502.171291882076048)$$

$$V_{22}(\text{Def2-SV(P)}) = -3004.140574111951537$$

$$= (-3003.929446892889246) - (-1501.960808751714922) + (-1502.171935970776985)$$

$$G(\text{Def2-SV(P)}) = -3003.899951939371$$

$$E(\text{Def2-SV(P)}) = -3004.151957943513025$$

5 8

|    |                 |                 |                 |
|----|-----------------|-----------------|-----------------|
| Cr | -2.656543978072 | -0.350718209000 | 0.013503254378  |
| O  | -1.081436897286 | 0.135502584371  | -1.526359759486 |
| O  | -2.303955955925 | -2.331835672743 | -0.145753341731 |
| O  | -4.264993251391 | -0.665727249449 | 1.348633104477  |
| O  | -2.957937019549 | 1.642566326357  | 0.069062460095  |
| O  | -1.262868602134 | -0.140956301278 | 1.452567391140  |
| O  | -4.142160379138 | -0.449918623797 | -1.364106552419 |
| H  | -4.064674019359 | -0.624758068435 | -2.319556669841 |

|    |                 |                 |                 |
|----|-----------------|-----------------|-----------------|
| H  | -1.370267971564 | 0.791171775731  | -2.192880752158 |
| H  | -2.853206039943 | -2.910757240781 | -0.705315041318 |
| H  | -4.618780157694 | 0.064670342468  | 1.888821040988  |
| H  | -3.748830803897 | 2.069511051680  | -0.307176339098 |
| H  | -1.533351932780 | -0.041170049946 | 2.383999664195  |
| H  | -0.748313454633 | -0.635469617249 | -2.028563901949 |
| H  | -1.884554467137 | -2.872023532255 | 0.548586419431  |
| H  | -4.338644713339 | -1.487209161408 | 1.868189647448  |
| H  | -2.522582769495 | 2.248421863064  | 0.695432243944  |
| H  | -0.371117196425 | -0.571041351287 | 1.431360610943  |
| H  | -5.020267372630 | -0.738352468906 | -1.052972585127 |
| Cr | 2.602936767348  | 0.410870983190  | 0.556887281691  |
| O  | 3.982800500335  | 1.899090819086  | -0.027219569301 |
| O  | 2.830240154683  | -0.666257060606 | -1.139191263453 |
| O  | 1.256340290306  | -1.241219191642 | 1.291018686337  |
| O  | 2.373861080464  | 1.449488501302  | 2.279873811769  |
| O  | 4.237781824945  | -0.470769063383 | 1.367999807480  |
| O  | 1.006044910873  | 1.361163137022  | -0.211525215197 |
| H  | 1.068151238701  | 2.299015905052  | -0.469094626420 |
| H  | 3.988847390926  | 2.749544379297  | 0.448846297173  |
| H  | 2.503001275666  | -0.361391497921 | -2.005465087861 |
| H  | 1.446842118529  | -1.601067719871 | 2.181068875321  |
| H  | 1.524126355571  | 1.844762651538  | 2.547644730508  |
| H  | 4.351219556517  | -1.399554334050 | 1.638610370051  |
| H  | 4.203909557675  | 2.070644900442  | -0.960527489836 |
| H  | 3.625091976021  | -1.212261992447 | -1.282947100346 |
| H  | 1.239457594272  | -2.010390191636 | 0.685586261331  |
| H  | 2.872312506986  | 1.195085614492  | 3.078049489434  |
| H  | 5.111431257029  | -0.078609007398 | 1.183842502485  |
| H  | 0.282018088758  | 0.935160295135  | -0.735885952951 |

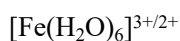

$$V_{11}(\text{Def2-SV(P)}) = -3442.565443258951746$$

$$= (-3442.309747902589152) - (-1721.151270697494056) + (-1721.406966053856877)$$

$$V_{22}(\text{Def2-SV(P)}) = -3442.565443245694951$$

$$= (-3442.309747902589152) - (-1721.151189253019993) + (-1721.406884596125792)$$

$G(\text{Def2-SV(P)}) = -3442.325225038344$

$E(\text{Def2-SV(P)}) = -3442.574685019875233$

5 10

|    |                 |                 |                 |
|----|-----------------|-----------------|-----------------|
| Fe | -2.653830416987 | -0.020018274619 | -0.232500451317 |
| O  | -1.105976560323 | 1.460764842602  | -0.679352646663 |
| O  | -2.377790122898 | -0.885539920619 | -2.067256101536 |
| O  | -4.235372321002 | -1.238960380963 | 0.288374642580  |
| O  | -2.940676106311 | 0.984960512057  | 1.532929962093  |
| O  | -1.263645508654 | -1.277979521584 | 0.558846526416  |
| O  | -4.086718026097 | 1.223780234036  | -1.050178511285 |
| H  | -3.995076632798 | 1.888678134646  | -1.756149210620 |
| H  | -1.339695724308 | 2.399127237679  | -0.530246799255 |
| H  | -2.913713090180 | -0.662469322624 | -2.850186483573 |
| H  | -4.596275812269 | -1.224412206024 | 1.193390300850  |
| H  | -3.528946945265 | 1.757567840685  | 1.615349249273  |
| H  | -1.442974936965 | -1.868760352303 | 1.312328361295  |
| H  | -0.758754050539 | 1.406746378954  | -1.593356373470 |
| H  | -1.938327088649 | -1.740511628938 | -2.227301329630 |
| H  | -4.422890415167 | -2.108741789347 | -0.109042393195 |
| H  | -2.386381644433 | 0.922121416133  | 2.331716332796  |
| H  | -0.380039176096 | -1.506188355959 | 0.181220880320  |
| H  | -5.029062161605 | 0.990586560340  | -0.965446999987 |
| Fe | 2.614223786779  | -0.270923254579 | 0.505823757061  |
| O  | 3.936450460763  | 0.954916904901  | 1.509511520457  |
| O  | 2.882232884907  | 0.792234455238  | -1.223782993356 |
| O  | 1.261563523415  | -1.621808944465 | -0.566453401539 |
| O  | 2.405688722707  | -1.417563238270 | 2.185303451677  |
| O  | 4.280959854492  | -1.397110302262 | 0.031139868288  |
| O  | 1.002189711858  | 0.865158601257  | 1.016583151299  |
| H  | 0.979673593894  | 1.399250315485  | 1.831139401026  |
| H  | 4.037914477627  | 0.935141477255  | 2.478225107911  |
| H  | 2.439880850344  | 1.622734486714  | -1.476879823641 |
| H  | 1.470517052679  | -2.577206157378 | -0.535722816165 |
| H  | 1.624758237178  | -1.445879160982 | 2.767062555189  |
| H  | 4.424377176964  | -2.036956397512 | -0.688805122723 |
| H  | 4.230160691722  | 1.823562984582  | 1.180891033788  |

|   |                |                 |                 |
|---|----------------|-----------------|-----------------|
| H | 3.624175280094 | 0.634698474837  | -1.835462361495 |
| H | 1.165300733610 | -1.394641501550 | -1.513759799545 |
| H | 2.982717435445 | -2.175102426090 | 2.390697190871  |
| H | 5.141358799581 | -1.186652280139 | 0.437169166746  |
| H | 0.278380423376 | 1.173548447885  | 0.419622498599  |

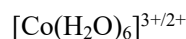

$$V_{11}(\text{Def2-SV(P)}) = -3680.603458192495054$$

$$= (-3680.299209946947940) - (-1840.146212528100023) + (-1840.450460773646910)$$

$$V_{22}(\text{Def2-SV(P)}) = -3680.603457908308883$$

$$= (-3680.299209946947940) - (-1840.146417066722051) + (-1840.450665028082994)$$

$$G(\text{Def2-SV(P)}) = -3680.360882698170$$

$$E(\text{Def2-SV(P)}) = -3680.613526318694312$$

5 8

|    |                 |                 |                 |
|----|-----------------|-----------------|-----------------|
| Co | -2.638734439171 | -0.046474449081 | -0.060421456864 |
| O  | -1.237974641763 | 0.136329172067  | -1.689844701895 |
| O  | -2.625162763552 | -2.061406330287 | -0.177705983362 |
| O  | -3.862945896637 | -0.246734258167 | 1.577888362623  |
| O  | -2.671578086937 | 1.971460439084  | 0.053106237997  |
| O  | -1.108613852260 | -0.060744615155 | 1.227992468783  |
| O  | -4.202628481544 | -0.057356378766 | -1.336845099880 |
| H  | -4.278548359003 | 0.412408677828  | -2.187152038406 |
| H  | -1.048899730625 | 1.071380878372  | -1.910624861732 |
| H  | -3.011091058617 | -2.559885784542 | -0.921573464191 |
| H  | -4.460031882855 | 0.470769179548  | 1.857009429218  |
| H  | -3.329308784187 | 2.529303282475  | -0.402336659991 |
| H  | -1.258102962385 | -0.373302412325 | 2.139254136694  |
| H  | -1.463965135761 | -0.303361344654 | -2.534365441950 |
| H  | -1.984212922568 | -2.631607155349 | 0.285748004228  |
| H  | -4.317240758933 | -1.095673079386 | 1.727265115496  |
| H  | -2.326971849851 | 2.463066851942  | 0.821658601806  |
| H  | -0.289952233048 | 0.493512814651  | 1.206672792355  |
| H  | -5.068851500851 | -0.449322391434 | -1.122773503787 |
| Co | 2.626160145029  | -0.009274064082 | 0.061895873188  |
| O  | 4.004759739909  | -1.252654078666 | -0.804101470834 |
| O  | 2.617744793124  | -1.261751317606 | 1.645951295057  |



|   |                |                 |                 |
|---|----------------|-----------------|-----------------|
| O | 1.252620547016 | 1.337072396549  | 1.024393430650  |
| O | 2.640325736871 | 1.319407226703  | -1.466039754703 |
| O | 4.200691989524 | 0.924785596548  | 0.928503938327  |
| O | 1.106708261989 | -1.000657680404 | -0.775316154675 |
| H | 1.183401760567 | -1.931737505768 | -1.052426894279 |
| H | 4.046744143213 | -1.413661739219 | -1.763938936295 |
| H | 1.903932532987 | -1.897699114620 | 1.837068345856  |
| H | 1.093067511257 | 2.140874252386  | 0.488207588245  |
| H | 2.241372482112 | 1.148642416915  | -2.339413780196 |
| H | 4.274474483465 | 1.851751518179  | 1.219191526035  |
| H | 4.236986728521 | -2.080215109752 | -0.344340151818 |
| H | 3.089578614635 | -1.054896139859 | 2.474046527225  |
| H | 1.465988555346 | 1.644978522823  | 1.928325090203  |
| H | 3.368342453316 | 1.958742384400  | -1.580133355725 |
| H | 5.097372377115 | 0.552527219941  | 0.840558677625  |
| H | 0.291441128369 | -0.616027078803 | -1.183064671996 |

[Ru(H<sub>2</sub>O)<sub>6</sub>]<sup>3+/2+</sup>

$V_{11}(\text{Def2-SV(P)}) = -1105.128766467893001$

$= (-1104.899865079838037) - (-552.447279350184658) + (-552.676180738239509)$

$V_{22}(\text{Def2-SV(P)}) = -1105.128766469069660$

$= (-1104.899865079838037) - (-552.446046368063207) + (-552.674947757294831)$

$G(\text{Def2-SV(P)}) = -1104.869946861811$

$E(\text{Def2-SV(P)}) = -1105.138715075217078$

5 2

|    |                 |                 |                 |
|----|-----------------|-----------------|-----------------|
| Ru | -2.690204144839 | 0.047992392758  | -0.151650344202 |
| O  | -1.170415715980 | -0.512177101560 | -1.578336040548 |
| O  | -2.491016684875 | -1.983529446457 | 0.408186791017  |
| O  | -4.205741080222 | 0.565554262895  | 1.182666704655  |
| O  | -2.893655042208 | 2.071888557133  | -0.710386863659 |
| O  | -1.172237473503 | 0.629315992082  | 1.121609345156  |
| O  | -4.256160178968 | -0.373374725957 | -1.458072789408 |
| H  | -4.251937715554 | -1.107941256616 | -2.098418087640 |
| H  | -1.369897956923 | -0.302229512466 | -2.513254698871 |
| H  | -3.227647176386 | -2.577960624745 | 0.172703601400  |
| H  | -4.344445907937 | 1.525091055704  | 1.297254868805  |

|    |                 |                 |                 |
|----|-----------------|-----------------|-----------------|
| H  | -3.266786221106 | 2.227894995760  | -1.598570643122 |
| H  | -1.384942984190 | 1.161095438100  | 1.909621531367  |
| H  | -1.026245085368 | -1.480339037226 | -1.531079516077 |
| H  | -2.259747071314 | -2.177178713786 | 1.335561902992  |
| H  | -4.265743141216 | 0.134893375273  | 2.055046541176  |
| H  | -2.093465419750 | 2.623672451636  | -0.629362710696 |
| H  | -0.387105846642 | 0.062218793805  | 1.320467495022  |
| H  | -5.156849957885 | -0.278785993013 | -1.094271561233 |
| Ru | 2.673165374671  | 0.004911489959  | 0.164853736661  |
| O  | 4.190512937764  | 0.792607553793  | -1.042150060390 |
| O  | 2.781072694513  | -1.623694477641 | -1.143878295867 |
| O  | 1.154841780414  | -0.782294365578 | 1.510105891505  |
| O  | 2.609696330353  | 1.626971726845  | 1.474291417823  |
| O  | 4.250452077511  | -0.723622152668 | 1.310731816989  |
| O  | 1.144786009757  | 0.901392915159  | -0.926186950150 |
| H  | 1.399514788692  | 1.515115908770  | -1.638786169700 |
| H  | 4.307496294705  | 1.759005994178  | -1.095677160653 |
| H  | 1.997789784430  | -2.161543919869 | -1.358169759781 |
| H  | 1.405758294727  | -0.618007258451 | 2.442923684612  |
| H  | 1.957564764153  | 2.331244382158  | 1.299983973792  |
| H  | 4.226952993268  | -1.597049698679 | 1.742964918761  |
| H  | 4.249245682890  | 0.433936899688  | -1.948034684739 |
| H  | 3.547875725443  | -2.223773098493 | -1.085112780749 |
| H  | 0.990356602157  | -1.745096561987 | 1.441131613822  |
| H  | 3.439596314146  | 2.042493484339  | 1.773848094947  |
| H  | 5.144123087301  | -0.574422865441 | 0.948071103704  |
| H  | 0.366691234369  | 0.378908355398  | -1.234006947455 |

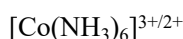

$$V_{11}(\text{Def2-SV(P)}) = -3442.696463510656031$$

$$= (-3442.510373964913015) - (-1721.257720332878080) + (-1721.443809878620868)$$

$$V_{22}(\text{Def2-SV(P)}) = -3442.696463498868980$$

$$= (-3442.510373964913015) - (-1721.257715265390971) + (-1721.443804799346935)$$

$$G(\text{Def2-SV(P)}) = -3442.270547291802$$

$$E(\text{Def2-SV(P)}) = -3442.699017642926719$$

5 4

|    |                 |                 |                 |
|----|-----------------|-----------------|-----------------|
| Co | 3.568130782296  | 0.133968334103  | 0.002149204446  |
| N  | 3.605717757763  | 1.698144020153  | -1.379007599946 |
| H  | 3.287094053599  | 2.591784767282  | -0.991753526222 |
| H  | 3.025196364701  | 1.527791622129  | -2.206326820565 |
| H  | 4.551288584935  | 1.874210716462  | -1.734104447252 |
| N  | 2.302915870170  | 1.199883255391  | 1.272284763749  |
| H  | 1.602587202165  | 0.588211192563  | 1.703336700223  |
| H  | 1.771360889945  | 1.940205303985  | 0.803923859927  |
| H  | 2.792523802381  | 1.653496107761  | 2.049995584495  |
| N  | 3.640855988030  | -1.432668895621 | 1.385239836425  |
| H  | 2.984407384384  | -2.193195178039 | 1.182830132080  |
| H  | 3.440652046044  | -1.139319224901 | 2.346902573283  |
| H  | 4.567329916913  | -1.870201663544 | 1.414110339601  |
| N  | 1.879687480817  | -0.650094621246 | -0.942299441523 |
| H  | 1.205411019092  | 0.071438075104  | -1.214750469561 |
| H  | 1.359115729211  | -1.310113519324 | -0.356673900723 |
| H  | 2.104952671304  | -1.160287247698 | -1.801956193516 |
| N  | 4.765514072565  | -1.024959024406 | -1.261770347472 |
| H  | 4.743052718866  | -0.712878036844 | -2.237752053879 |
| H  | 4.477533110420  | -2.008789737584 | -1.275850114051 |
| H  | 5.755201664525  | -1.032481774304 | -0.996271424474 |
| N  | 5.233226152136  | 0.982536503343  | 0.937948575753  |
| H  | 5.138083969288  | 1.992764362189  | 1.082403084302  |
| H  | 6.103271767448  | 0.862935232246  | 0.409808510837  |
| H  | 5.416610604330  | 0.582456830146  | 1.863424830656  |
| Co | -3.567658897670 | -0.129317564957 | -0.002855939139 |
| N  | -3.199088147231 | 1.011955428019  | -1.714506763117 |
| H  | -4.069882293625 | 1.299836699605  | -2.171974159531 |
| H  | -2.659188872753 | 0.519770641285  | -2.433101823929 |
| H  | -2.684845822575 | 1.878265136897  | -1.525569406923 |
| N  | -4.835572671944 | 1.387565142477  | 0.675981506635  |
| H  | -5.827554153936 | 1.201862797938  | 0.498708127308  |
| H  | -4.643419808419 | 2.293453213331  | 0.236674048468  |
| H  | -4.761966159404 | 1.543827093712  | 1.686301206249  |
| N  | -4.045091483681 | -1.233953485780 | 1.700817049566  |
| H  | -3.750011923023 | -2.214100680306 | 1.649299564840  |

|   |                 |                 |                 |
|---|-----------------|-----------------|-----------------|
| H | -5.056133519000 | -1.254847929692 | 1.869512076669  |
| H | -3.629916407877 | -0.859440052027 | 2.559564811738  |
| N | -5.113608404878 | -1.070881871400 | -1.050315196864 |
| H | -5.945255497841 | -0.486635189752 | -1.181946209420 |
| H | -5.446120480790 | -1.925545012182 | -0.592899722327 |
| H | -4.825718355762 | -1.353540622448 | -1.992611453401 |
| N | -2.263419412393 | -1.642753129147 | -0.614095741415 |
| H | -1.627248251031 | -1.347611044825 | -1.361161227513 |
| H | -2.742072120859 | -2.475756330345 | -0.971059374142 |
| H | -1.661495911907 | -1.971475976619 | 0.147306532688  |
| N | -1.969384105833 | 0.776001833208  | 0.989311698706  |
| H | -2.225113285383 | 1.645511265370  | 1.467630000343  |
| H | -1.210974891254 | 1.026238918165  | 0.347879201835  |
| H | -1.542127135270 | 0.177311698125  | 1.702503468045  |

[Ru(NH<sub>3</sub>)<sub>6</sub>]<sup>3+/2+</sup>

$V_{11}(\text{Def2-SV(P)}) = -867.287538130126450$

$= (-867.097813447911449) - (-433.550944332322160) + (-433.740669014537161)$

$V_{22}(\text{Def2-SV(P)}) = -867.287538117054282$

$= (-867.097813447911449) - (-433.551143413336604) + (-433.740868082479381)$

$G(\text{Def2-SV(P)}) = -866.860900293242$

$E(\text{Def2-SV(P)}) = -867.290207556746736$

5 2

|    |                |                 |                 |
|----|----------------|-----------------|-----------------|
| Ru | 3.510336687685 | 0.088039151964  | -0.128177149946 |
| N  | 4.480273475469 | -0.107691275111 | -2.037037228113 |
| H  | 3.894719521159 | 0.205856744170  | -2.817853226767 |
| H  | 4.737549871584 | -1.074632066708 | -2.259591300990 |
| H  | 5.351308814214 | 0.428344950415  | -2.108987423222 |
| N  | 2.647005080701 | 1.958533699873  | -0.740100727121 |
| H  | 1.639345307280 | 1.908996670092  | -0.918465479357 |
| H  | 3.058293925080 | 2.327854271715  | -1.603762225849 |
| H  | 2.765815801225 | 2.699879527912  | -0.041806683807 |
| N  | 2.511513584722 | 0.263012408936  | 1.767313060274  |
| H  | 1.957296383203 | -0.567547713163 | 2.001788983412  |
| H  | 1.852412056034 | 1.047288907642  | 1.802823503205  |
| H  | 3.145012808496 | 0.396115374744  | 2.562359109786  |

|    |                 |                 |                 |
|----|-----------------|-----------------|-----------------|
| N  | 1.845655651458  | -0.995993764863 | -0.952103780183 |
| H  | 1.211136024683  | -0.407449405291 | -1.500461305040 |
| H  | 1.257442189534  | -1.442629756494 | -0.241277149392 |
| H  | 2.131925735085  | -1.749221566102 | -1.585536038098 |
| N  | 4.409729517949  | -1.758844346602 | 0.513127454734  |
| H  | 5.299357474144  | -1.956278412433 | 0.043158608005  |
| H  | 3.821239394518  | -2.580274312809 | 0.340106263764  |
| H  | 4.617498422597  | -1.777589750235 | 1.516768823019  |
| N  | 5.192404890155  | 1.167615878849  | 0.658069524187  |
| H  | 5.467250362503  | 1.959564428930  | 0.066879668982  |
| H  | 6.035256166399  | 0.592955430982  | 0.757719381914  |
| H  | 5.019895627706  | 1.572843150590  | 1.583525738457  |
| Ru | -3.519245869589 | -0.088959642997 | 0.130914770142  |
| N  | -4.001214121571 | 0.315445878330  | -1.929210896381 |
| H  | -4.975841559968 | 0.605988435705  | -2.057371691184 |
| H  | -3.870455999528 | -0.496644152335 | -2.540996374700 |
| H  | -3.436740819000 | 1.063446445809  | -2.344273757284 |
| N  | -4.653392778652 | 1.635970135404  | 0.732205753445  |
| H  | -5.668238015330 | 1.502614719448  | 0.683137569942  |
| H  | -4.460283278587 | 2.454008393812  | 0.144158045574  |
| H  | -4.458131269419 | 1.936536808838  | 1.692709579362  |
| N  | -3.085319840923 | -0.492189068015 | 2.198340110797  |
| H  | -2.716513813600 | -1.433889484047 | 2.365392109991  |
| H  | -3.914466469837 | -0.415682122248 | 2.795958444538  |
| H  | -2.393382454882 | 0.147878116413  | 2.600587013914  |
| N  | -5.272230614388 | -1.325749078886 | 0.261940448507  |
| H  | -6.047299824453 | -0.890005373513 | 0.771433905009  |
| H  | -5.093212758886 | -2.209287243747 | 0.751121020108  |
| H  | -5.653707371000 | -1.588743072193 | -0.652236075579 |
| N  | -2.359400217725 | -1.786505579700 | -0.506706536182 |
| H  | -1.726197724274 | -1.555121985438 | -1.278703469593 |
| H  | -2.929546305332 | -2.569080807032 | -0.843107802736 |
| H  | -1.760661083310 | -2.177059064686 | 0.227345558072  |
| N  | -1.739313358490 | 1.121858785216  | 0.026738099764  |
| H  | -1.854150816008 | 2.051352644312  | 0.443159488210  |
| H  | -1.401879931823 | 1.286638402503  | -0.926549972039 |

H -0.953235150373 0.693793349705 0.525077400206

[Ru(NH<sub>3</sub>)<sub>5</sub>py]<sup>3+/2+</sup>

V<sub>11</sub>(Def2-SV(P)) = -1250.346858971574875

= (-1250.151098990277887) - (-625.073141064543393) + (-625.268901045840380)

V<sub>22</sub>(Def2-SV(P)) = -1250.346858971454822

= (-1250.151098990277887) - (-625.073626527178817) + (-625.269386508355865)

G(Def2-SV(P)) = -1249.821063282066

E(Def2-SV(P)) = -1250.349972976428035

5 2

Ru -4.529621865167 -0.082186080665 0.018152907471

N -4.098085751651 -1.469456973721 -1.566566782099

H -4.244878140394 -2.448239170638 -1.299751656546

H -3.128662590117 -1.430738190955 -1.896229676453

H -4.678482117254 -1.326672430763 -2.399394950994

N -6.490656007607 -0.952630748944 0.143167134455

H -6.889804861540 -0.942999269348 1.087327956871

H -6.506957602563 -1.934479844016 -0.151779491904

H -7.176283295717 -0.482159394859 -0.456490691831

N -3.876702610490 -1.517986276972 1.477222561385

H -2.955427824518 -1.312160051067 1.875812671913

H -3.799892856214 -2.469771846823 1.105110019568

H -4.513113199667 -1.590566948186 2.277733487528

N -5.041105725126 1.285412984230 1.591907087027

H -4.514857678383 2.164615545602 1.544715000851

H -4.897076606592 0.917990779591 2.538059348273

H -6.028511338396 1.561121797080 1.561037254691

N -5.255633410777 1.356820887497 -1.401345889711

H -5.432456258214 0.983854264632 -2.339654642841

H -4.609381522201 2.143351677619 -1.525811611142

H -6.140276430974 1.786847193096 -1.110992281274

C -0.104307728550 2.007475564363 -0.308142352896

C -0.657674956454 1.710472849475 0.934735017778

C -1.903163995793 1.100493579200 0.986313127414

N -2.603479650458 0.777542074427 -0.117407853109

C -2.056033757618 1.055452892917 -1.317090138273

|    |                 |                 |                 |
|----|-----------------|-----------------|-----------------|
| C  | -0.817445527555 | 1.664795676058  | -1.454626317670 |
| H  | 0.866023537996  | 2.503014259825  | -0.381925177943 |
| H  | -0.139771190029 | 1.951643359169  | 1.864705991350  |
| H  | -2.358038089249 | 0.872688970984  | 1.952082006407  |
| H  | -2.634012299294 | 0.787543390791  | -2.204246148949 |
| H  | -0.427722552466 | 1.868046216883  | -2.453516036827 |
| Ru | 4.530079763643  | 0.086050139963  | 0.031643702242  |
| N  | 6.551617270158  | 0.823858362536  | 0.184549754307  |
| H  | 7.225071593909  | 0.283376752262  | -0.367825079427 |
| H  | 6.907960507785  | 0.813046864130  | 1.145717934754  |
| H  | 6.656306137448  | 1.791149687642  | -0.138599255796 |
| N  | 5.117517157410  | -1.238003426979 | -1.560937093010 |
| H  | 6.052479898521  | -1.635445334757 | -1.424820174216 |
| H  | 5.147348859764  | -0.792431307780 | -2.483374179249 |
| H  | 4.495936523055  | -2.047881750446 | -1.655955508741 |
| N  | 5.013674619920  | -1.470566294587 | 1.437174840083  |
| H  | 5.939305176382  | -1.876686648166 | 1.265225199153  |
| H  | 4.360309954766  | -2.259392093579 | 1.386834150198  |
| H  | 5.028985716024  | -1.178189135564 | 2.419374405946  |
| N  | 3.994056977361  | 1.431434226826  | 1.620535055644  |
| H  | 4.506427574511  | 2.317783065204  | 1.572497167318  |
| H  | 4.174645120954  | 1.071065307893  | 2.562581128209  |
| H  | 3.002631161281  | 1.690936395092  | 1.606847041766  |
| N  | 4.105972368008  | 1.638992707552  | -1.398620385786 |
| H  | 4.808844206848  | 1.702248673724  | -2.142334345261 |
| H  | 4.064519832742  | 2.573501616195  | -0.979717856284 |
| H  | 3.209463821290  | 1.522724549592  | -1.880691589308 |
| C  | 0.036456670819  | -1.857451321866 | -0.205726535381 |
| C  | 0.714478546418  | -1.505069322600 | -1.369984480221 |
| C  | 1.966659817224  | -0.915184109837 | -1.264635694845 |
| N  | 2.559179325221  | -0.665905622694 | -0.081860924193 |
| C  | 1.884900055436  | -0.982223056738 | 1.040057052335  |
| C  | 0.630895459866  | -1.576607972949 | 1.022049401434  |
| H  | -0.937117310758 | -2.349715173184 | -0.254228735931 |
| H  | 0.289534992884  | -1.690878809125 | -2.358055741508 |
| H  | 2.522193600306  | -0.646262294236 | -2.165544366858 |

|   |                |                 |                |
|---|----------------|-----------------|----------------|
| H | 2.373662789230 | -0.761610466803 | 1.991045550568 |
| H | 0.139301252817 | -1.821161990048 | 1.965458593257 |

[Co(en)<sub>3</sub>]<sup>3+/2+</sup>

$V_{11}(\text{Def2-SV(P)}) = -3906.715313136320219$

$= (-3906.529880136416068) - (-1953.266476957097893) + (-1953.451909957002044)$

$V_{22}(\text{Def2-SV(P)}) = -3906.715314421212952$

$= (-3906.529880136416068) - (-1953.266262240199012) + (-1953.451696524995896)$

$G(\text{Def2-SV(P)}) = -3906.061098153951$

$E(\text{Def2-SV(P)}) = -3906.717253507189980$

5 4

|    |                 |                 |                 |
|----|-----------------|-----------------|-----------------|
| Co | -3.873543706532 | 0.067386073654  | -0.012046321930 |
| N  | -1.841840968073 | 0.443739017762  | 0.274256422314  |
| N  | -4.077773824360 | 1.612370762429  | 1.382563836433  |
| N  | -3.938018339659 | 1.359805623230  | -1.657340201658 |
| N  | -3.476666093987 | -1.363208483148 | -1.484583364256 |
| N  | -3.966479144451 | -1.380452126094 | 1.490999619343  |
| N  | -5.938498643143 | -0.257056170790 | -0.087585774465 |
| C  | -1.686549489430 | 1.738227415963  | 0.968762646149  |
| C  | -2.768210576201 | 1.848675938218  | 2.024549834912  |
| C  | -4.054143188524 | 0.539380101462  | -2.881757332212 |
| C  | -3.142925278643 | -0.663265745331 | -2.743523013749 |
| C  | -5.286583597601 | -2.043036606212 | 1.422770190942  |
| C  | -6.339585999004 | -0.993921199723 | 1.129409119421  |
| H  | -4.712057873248 | 2.028644968589  | -1.615195970546 |
| H  | -3.096213786021 | 1.940080898897  | -1.714696968106 |
| H  | -4.281126579760 | -1.977525489330 | -1.638029503995 |
| H  | -2.713352573931 | -1.994442529161 | -1.225302026859 |
| H  | -4.378193442905 | 2.461242425563  | 0.894524290624  |
| H  | -4.794158812192 | 1.457687345336  | 2.096633367852  |
| H  | -1.300990651606 | 0.440772986818  | -0.592547808472 |
| H  | -1.433861814271 | -0.303050747944 | 0.844195409030  |
| H  | -3.840363424405 | -0.960043027860 | 2.415992210063  |
| H  | -3.226589129200 | -2.084120146950 | 1.420284154509  |
| H  | -6.205576670566 | -0.796608201783 | -0.915637685442 |
| H  | -6.473783510088 | 0.612710933766  | -0.161908853368 |



|    |                 |                 |                 |
|----|-----------------|-----------------|-----------------|
| H  | -7.331854898527 | -1.456638158346 | 1.009999822022  |
| H  | -6.410243078163 | -0.276339650177 | 1.961873793899  |
| H  | -5.515271824954 | -2.578444310042 | 2.357659486604  |
| H  | -5.253474169724 | -2.789091554277 | 0.613504628257  |
| H  | -1.790814526146 | 2.545309669855  | 0.226789317469  |
| H  | -0.687552387634 | 1.837055606654  | 1.421115065296  |
| H  | -2.621101474473 | 1.081775912293  | 2.801468327635  |
| H  | -2.733486272090 | 2.831716134147  | 2.519924713693  |
| H  | -2.090035331152 | -0.342988895227 | -2.693817419009 |
| H  | -3.241284988632 | -1.331984956917 | -3.612926289577 |
| H  | -5.102159976758 | 0.216107112334  | -2.981760524561 |
| H  | -3.800665900015 | 1.122060421719  | -3.781370589917 |
| Co | 3.891531311702  | -0.069908494471 | 0.010985466454  |
| N  | 5.333591151497  | -1.329985357322 | 0.852866225815  |
| N  | 5.486652672181  | 0.476436760106  | -1.228123525268 |
| N  | 3.225805631187  | -1.583142113830 | -1.264183927007 |
| N  | 2.400874372643  | -0.826291680476 | 1.265324252198  |
| N  | 4.295866686149  | 1.505096357056  | 1.321620847738  |
| N  | 2.609798624038  | 1.330766138276  | -0.860175959587 |
| C  | 6.502471634298  | -1.390632112126 | -0.049899856701 |
| C  | 6.745245799093  | -0.010262479941 | -0.626043102639 |
| C  | 1.902227377568  | -2.034144166064 | -0.786026792669 |
| C  | 1.941309440812  | -2.124227313899 | 0.726554223368  |
| C  | 3.235029683635  | 2.523229842754  | 1.168146652782  |
| C  | 2.912607416457  | 2.667859003530  | -0.306151363960 |
| H  | 3.158416444454  | -1.282473464173 | -2.240121864656 |
| H  | 3.873462180638  | -2.376220053074 | -1.277477631728 |
| H  | 1.607035476921  | -0.185861699770 | 1.341930037110  |
| H  | 2.732155550825  | -0.943010940264 | 2.226620847374  |
| H  | 5.360238256466  | 0.044638441553  | -2.148407106513 |
| H  | 5.558632172005  | 1.478929851447  | -1.418744337982 |
| H  | 5.002995066487  | -2.276496819270 | 1.057587324759  |
| H  | 5.622605032558  | -0.953917422995 | 1.760790479895  |
| H  | 5.206912197866  | 1.928016994655  | 1.122945179014  |
| H  | 4.351575134167  | 1.209309951876  | 2.299879993618  |
| H  | 1.630697104036  | 1.100212137780  | -0.678672646859 |

|   |                |                 |                 |
|---|----------------|-----------------|-----------------|
| H | 2.685572593256 | 1.348136382986  | -1.881089056859 |
| H | 2.072383404546 | 3.363784131734  | -0.455946197177 |
| H | 3.778719603881 | 3.078946565853  | -0.847612668789 |
| H | 3.542810183830 | 3.490350738373  | 1.596100835018  |
| H | 2.349747747286 | 2.184714057786  | 1.728514775209  |
| H | 6.278635947558 | -2.105119203386 | -0.857421859524 |
| H | 7.397571390178 | -1.758090246197 | 0.476087443022  |
| H | 7.043403753241 | 0.692143350952  | 0.168354986316  |
| H | 7.561497477456 | -0.035037869289 | -1.365372331513 |
| H | 2.653542866678 | -2.901905136527 | 1.044068358686  |
| H | 0.953457060037 | -2.398819095031 | 1.128737698430  |
| H | 1.151631708608 | -1.296377744945 | -1.108538974611 |
| H | 1.622759498802 | -3.003454840985 | -1.228041482225 |

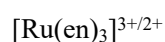

$$V_{11}(\text{Def2-SV(P)}) = -1331.298731632575709$$

$$= (-1331.107100323488112) - (-665.554889362532549) + (-665.746520671620033)$$

$$V_{22}(\text{Def2-SV(P)}) = -1331.298731701906718$$

$$= (-1331.107100323488112) - (-665.554947127917103) + (-665.746578506335709)$$

$$G(\text{Def2-SV(P)}) = -1330.643924392442$$

$$E(\text{Def2-SV(P)}) = -1331.301071943684065$$

5 2

|    |                 |                 |                 |
|----|-----------------|-----------------|-----------------|
| Ru | -3.907936323779 | 0.039055352007  | -0.026228322528 |
| N  | -1.860142158307 | 0.583442169090  | 0.313743621962  |
| N  | -4.200558232199 | 1.547491043933  | 1.478773080855  |
| N  | -3.971712660555 | 1.411176349058  | -1.680970957701 |
| N  | -3.457964798867 | -1.328431530664 | -1.620968670257 |
| N  | -3.960886523300 | -1.469943807178 | 1.505142609743  |
| N  | -5.985359137104 | -0.496232726451 | -0.148303313666 |
| C  | -1.808898741098 | 1.852232122708  | 1.079282823054  |
| C  | -2.900965107123 | 1.842951455376  | 2.130252510241  |
| C  | -4.047884812242 | 0.634820713133  | -2.942713037002 |
| C  | -3.117693783041 | -0.556949023666 | -2.841835146093 |
| C  | -5.220142633442 | -2.243305297415 | 1.373708038716  |
| C  | -6.352621330445 | -1.289997016282 | 1.050097163598  |
| H  | -4.767270922546 | 2.054311902947  | -1.632706126130 |

|    |                 |                 |                 |
|----|-----------------|-----------------|-----------------|
| H  | -3.150592082813 | 2.022860045988  | -1.710865733456 |
| H  | -4.240227483823 | -1.956147047769 | -1.827373243729 |
| H  | -2.682203650000 | -1.954760964596 | -1.387991773857 |
| H  | -4.562823619534 | 2.398939204313  | 1.038512913685  |
| H  | -4.894458783150 | 1.317613639409  | 2.194671392885  |
| H  | -1.299580365046 | 0.677256672967  | -0.535633218321 |
| H  | -1.399297058555 | -0.157939183860 | 0.848325758473  |
| H  | -3.907604501119 | -1.067536991478 | 2.445534728473  |
| H  | -3.165511141507 | -2.113401588159 | 1.456088600167  |
| H  | -6.198568647739 | -1.040867051665 | -0.989198708992 |
| H  | -6.596145135458 | 0.323332002812  | -0.212787350263 |
| H  | -7.292063600551 | -1.841267480935 | 0.887017994457  |
| H  | -6.518600151821 | -0.591529598909 | 1.884705711651  |
| H  | -5.435768309845 | -2.807689856273 | 2.294584667764  |
| H  | -5.087459070976 | -2.971595165664 | 0.558646683310  |
| H  | -1.965614243017 | 2.682354940241  | 0.372973006182  |
| H  | -0.820410639226 | 1.995050719218  | 1.544184351397  |
| H  | -2.706561672956 | 1.057051514058  | 2.877069244391  |
| H  | -2.934231011644 | 2.806013761534  | 2.663508414195  |
| H  | -2.071820014335 | -0.222943444483 | -2.755412094050 |
| H  | -3.191280811528 | -1.187454930756 | -3.741617141893 |
| H  | -5.088356602475 | 0.298560507358  | -3.073070047819 |
| H  | -3.787806162939 | 1.261830536879  | -3.810001644539 |
| Ru | 3.912579234808  | -0.035757615661 | 0.023214435901  |
| N  | 5.390070825737  | -1.386854520707 | 0.817203413325  |
| N  | 5.510094756558  | 0.342007835112  | -1.367994876833 |
| N  | 3.058836334596  | -1.658210598028 | -1.096671812184 |
| N  | 2.376173845327  | -0.627266630555 | 1.402490323401  |
| N  | 4.548373899219  | 1.645319384544  | 1.200200599222  |
| N  | 2.613640708450  | 1.463345812234  | -0.797041105003 |
| C  | 6.476552678895  | -1.557946614185 | -0.177689408203 |
| C  | 6.771222940000  | -0.221511028982 | -0.826351021516 |
| C  | 1.745752205488  | -2.015201435116 | -0.504859157822 |
| C  | 1.850034931201  | -1.957016796409 | 1.005899460673  |
| C  | 3.535446401219  | 2.721935859147  | 1.078723496174  |
| C  | 3.082342845821  | 2.803433279740  | -0.364625156865 |

|   |                |                 |                 |
|---|----------------|-----------------|-----------------|
| H | 2.929093844325 | -1.435374408104 | -2.087922224842 |
| H | 3.665875737560 | -2.482943204841 | -1.099464638001 |
| H | 1.605409778780 | 0.045347427328  | 1.440421594040  |
| H | 2.719853560041 | -0.673864578549 | 2.366255116322  |
| H | 5.300985195870 | -0.107255771141 | -2.265151277080 |
| H | 5.656295230374 | 1.326300533301  | -1.607088306606 |
| H | 5.039857799941 | -2.307556351583 | 1.095780949439  |
| H | 5.780195884628 | -0.992044541539 | 1.678842194148  |
| H | 5.461087013071 | 2.006713146097  | 0.908253419258  |
| H | 4.671969755932 | 1.407905512465  | 2.188917121715  |
| H | 1.641654225874 | 1.338952181974  | -0.504122868171 |
| H | 2.577592996905 | 1.432092498262  | -1.820037528616 |
| H | 2.288419122930 | 3.556965564258  | -0.484302453639 |
| H | 3.921296493304 | 3.096581543037  | -1.014840514013 |
| H | 3.942428786060 | 3.687819096335  | 1.416601151025  |
| H | 2.689169585980 | 2.466990863444  | 1.735662028302  |
| H | 6.135967921693 | -2.282021596951 | -0.934130156100 |
| H | 7.382740740603 | -1.970443220167 | 0.292730180554  |
| H | 7.171994309582 | 0.485863794834  | -0.083561053175 |
| H | 7.526893227971 | -0.332959015612 | -1.619844216282 |
| H | 2.547856111791 | -2.724069445839 | 1.375614410257  |
| H | 0.871307470731 | -2.149747773373 | 1.472483043563  |
| H | 1.003524825805 | -1.288118279535 | -0.866968944863 |
| H | 1.422487655030 | -3.014843598803 | -0.835397619634 |

[Fe(bpy)<sub>3</sub>]<sup>3+/2+</sup>

$$V_{11}(\text{Def2-SV(P)}) = -5495.854571864499121$$

$$= (-5495.652002809723854) - (-2747.819885154470740) + (-2748.022454209246007)$$

$$V_{22}(\text{Def2-SV(P)}) = -5495.854571868372659$$

$$= (-5495.652002809723854) - (-2747.819957364291895) + (-2748.022526422941155)$$

$$G(\text{Def2-SV(P)}) = -5494.952807644207$$

$$E(\text{Def2-SV(P)}) = -5495.858605522569633$$

5 2

|    |                 |                 |                |
|----|-----------------|-----------------|----------------|
| Fe | -4.267531369281 | 0.669611604322  | 0.073403486406 |
| C  | -6.965057238447 | -2.969282559916 | 1.509760801063 |
| C  | -2.719129467205 | 1.171529870654  | 2.562391484963 |

|   |                 |                 |                 |
|---|-----------------|-----------------|-----------------|
| C | -2.303862021210 | 0.912071976838  | 3.862019593760  |
| C | -2.855595323214 | -0.176304425566 | 4.532649525866  |
| C | -3.815499181692 | -0.952575933470 | 3.889801328947  |
| C | -4.194065340020 | -0.623398515277 | 2.590499023302  |
| C | -5.240593032018 | -1.330789333924 | 1.824817649219  |
| C | -5.985684378792 | -2.397363085268 | 2.318130853602  |
| C | -7.175990860231 | -2.455396714225 | 0.234446875049  |
| C | -6.392822247885 | -1.390119583768 | -0.192834371229 |
| H | -2.313945256452 | 2.016379533209  | 2.002838473252  |
| H | -1.558637615280 | 1.556924488264  | 4.330653851668  |
| H | -4.266455448575 | -1.801282276048 | 4.403779144616  |
| H | -5.812204832408 | -2.781611129338 | 3.323187462613  |
| H | -7.934685048572 | -2.868052872943 | -0.432229089667 |
| H | -6.522825060139 | -0.965884135678 | -1.189563126627 |
| N | -3.633257703961 | 0.418239731351  | 1.940788518843  |
| N | -5.445990688633 | -0.847837379168 | 0.580061793675  |
| C | -4.566566393412 | 0.411325090052  | -2.891792236729 |
| C | -5.110676214437 | 0.717780550990  | -4.132381627990 |
| C | -6.179326329997 | 1.606186701509  | -4.190611570621 |
| C | -6.670949885720 | 2.149800940865  | -3.007326496550 |
| C | -6.078459133357 | 1.793097561684  | -1.799204813402 |
| C | -6.524050765636 | 2.292521677458  | -0.482922087184 |
| C | -7.637140236648 | 3.107239128581  | -0.295313069781 |
| C | -7.972384910977 | 3.510799681286  | 0.994017017785  |
| C | -7.187081973587 | 3.085833000145  | 2.060641155795  |
| C | -6.092722660988 | 2.271607608042  | 1.799096004163  |
| C | -2.752867706168 | -1.816336162854 | -0.584340863068 |
| C | -1.711101247333 | -2.541242410146 | -1.148768225871 |
| C | -0.642926641642 | -1.847583700955 | -1.708789162118 |
| C | -0.641874050721 | -0.456960796232 | -1.659119493203 |
| C | -1.714798871254 | 0.204954161911  | -1.067649750217 |
| C | -1.825668274113 | 1.674380749459  | -0.959085156669 |
| C | -0.846931486662 | 2.566031941949  | -1.387725372705 |
| C | -1.056512704019 | 3.932950468170  | -1.224081047793 |
| C | -2.241665371580 | 4.370617347058  | -0.642465244542 |
| C | -3.177882496363 | 3.423563335597  | -0.244985273516 |

|    |                 |                 |                 |
|----|-----------------|-----------------|-----------------|
| H  | -3.732556871753 | -0.286780948123 | -2.812619393289 |
| H  | -4.693831064439 | 0.261031704504  | -5.031209970317 |
| H  | -7.507189432425 | 2.848137487874  | -3.033395595506 |
| H  | -8.246728134211 | 3.423074913398  | -1.141751808545 |
| H  | -7.410690634716 | 3.374513703067  | 3.088759760760  |
| H  | -5.454865279469 | 1.923801717189  | 2.612397805464  |
| H  | -3.617066989762 | -2.328006145917 | -0.159162889451 |
| H  | -1.752703282395 | -3.631359350128 | -1.152839892234 |
| H  | 0.182689321586  | 0.104176637179  | -2.095832802755 |
| H  | 0.073969837250  | 2.208858355328  | -1.847209079554 |
| H  | -2.450637145042 | 5.431123573139  | -0.494337782735 |
| H  | -4.118029801904 | 3.727722657245  | 0.218332788198  |
| N  | -5.035301393579 | 0.936302425441  | -1.753799268447 |
| N  | -5.766388152678 | 1.888009674369  | 0.559376882683  |
| N  | -2.761200033220 | -0.478003288185 | -0.557447392628 |
| N  | -2.971843275008 | 2.110729933721  | -0.394077732608 |
| H  | -7.559342514779 | -3.807652175805 | 1.879331473381  |
| H  | -2.549204424717 | -0.417576271467 | 5.552741047711  |
| H  | -0.296582971409 | 4.646169541633  | -1.550667417454 |
| H  | 0.184307563221  | -2.383639569482 | -2.179231887298 |
| H  | -6.631499275169 | 1.876420661138  | -5.147304380430 |
| H  | -8.842657203701 | 4.149566938849  | 1.159511781639  |
| Fe | 4.271389037086  | -0.670403518253 | -0.073830936095 |
| C  | 8.647633848758  | 0.890075734554  | -1.099733535868 |
| C  | 4.491023270200  | -0.842128760442 | 2.903725431369  |
| C  | 5.103918375941  | -0.640070692686 | 4.133715216318  |
| C  | 6.387015940401  | -0.103658707976 | 4.158886720856  |
| C  | 7.014524447706  | 0.203868273323  | 2.955047652405  |
| C  | 6.339944829313  | -0.028836370383 | 1.759603554468  |
| C  | 6.909945422625  | 0.239262993076  | 0.423730843044  |
| C  | 8.209497032658  | 0.688770932821  | 0.206129928896  |
| C  | 7.775673035013  | 0.632193379565  | -2.152468453429 |
| C  | 6.492624766442  | 0.187445877410  | -1.860567949181 |
| H  | 3.489246555238  | -1.269734085129 | 2.850012144410  |
| H  | 4.573259225215  | -0.903282885922 | 5.049910787671  |
| H  | 8.020714715736  | 0.622574312513  | 2.955516980891  |

|   |                 |                 |                 |
|---|-----------------|-----------------|-----------------|
| H | 8.882088677915  | 0.877631096863  | 1.042616860385  |
| H | 8.074561902292  | 0.771084991157  | -3.192552873659 |
| H | 5.781954033920  | -0.017714428018 | -2.661918542293 |
| N | 5.090716834763  | -0.542388391302 | 1.746013773949  |
| N | 6.067919258580  | 0.002406783666  | -0.605358918835 |
| C | 2.938120477204  | 0.134862861393  | -2.605811457127 |
| C | 2.451407258770  | -0.060471992129 | -3.891724766745 |
| C | 2.637348711024  | -1.302559242686 | -4.492641636350 |
| C | 3.317690239777  | -2.296851956847 | -3.795636698447 |
| C | 3.788085741446  | -2.024869997514 | -2.513072449592 |
| C | 4.568884233951  | -2.974804306888 | -1.694105973079 |
| C | 4.939524702219  | -4.249033302339 | -2.112902999573 |
| C | 5.697503331703  | -5.047463573404 | -1.259998796887 |
| C | 6.068827981172  | -4.548079614313 | -0.015972223161 |
| C | 5.659883094077  | -3.267823609522 | 0.337210684090  |
| C | 4.074419334023  | 2.300869443635  | 0.075732891046  |
| C | 3.474162374635  | 3.509434815519  | 0.408162783754  |
| C | 2.214831071595  | 3.488028241159  | 0.997829623940  |
| C | 1.599043360198  | 2.261536574640  | 1.233505441971  |
| C | 2.256726950664  | 1.090767419768  | 0.867476744285  |
| C | 1.701652815871  | -0.266070308801 | 1.054939517385  |
| C | 0.478599268568  | -0.534466674021 | 1.664960715523  |
| C | 0.053449434966  | -1.853388258603 | 1.789400204715  |
| C | 0.856579325976  | -2.870689680630 | 1.283958236058  |
| C | 2.069272110852  | -2.531644806089 | 0.697717127167  |
| H | 2.819563692067  | 1.096142243136  | -2.103339272618 |
| H | 1.937129673097  | 0.753839071632  | -4.404847923469 |
| H | 3.483191297733  | -3.271069469458 | -4.255157893901 |
| H | 4.646343339142  | -4.622656034386 | -3.094005857637 |
| H | 6.666088955728  | -5.135672307004 | 0.682870408876  |
| H | 5.923744919821  | -2.845172714686 | 1.308065825262  |
| H | 5.060368162125  | 2.277988589932  | -0.391873911459 |
| H | 3.996329970835  | 4.445395508470  | 0.204200792057  |
| H | 0.615260937079  | 2.228165794433  | 1.700211465606  |
| H | -0.134765714113 | 0.274653222549  | 2.058411308041  |
| H | 0.562317983054  | -3.919299615117 | 1.347176991429  |

|   |                 |                 |                 |
|---|-----------------|-----------------|-----------------|
| H | 2.733825586687  | -3.306481723636 | 0.313702628801  |
| N | 3.581093431948  | -0.824696682262 | -1.931681363507 |
| N | 4.923381462332  | -2.505394344514 | -0.477900009576 |
| N | 3.478966547905  | 1.123646134566  | 0.294320504111  |
| N | 2.487400053848  | -1.263971884807 | 0.598679469543  |
| H | 9.664001374837  | 1.242456617212  | -1.288457587107 |
| H | 6.901154141643  | 0.074211328279  | 5.105866770725  |
| H | -0.897164014793 | -2.082823354129 | 2.276025077981  |
| H | 1.710072050113  | 4.416230564034  | 1.274484382890  |
| H | 2.263772776914  | -1.496884775988 | -5.500257348789 |
| H | 5.996206226260  | -6.050779590827 | -1.571383641858 |

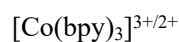

$$V_{11}(\text{Def2-SV(P)}) = -5733.941444173276977$$

$$= (-5733.763712038402446) - (-2866.875828421020742) + (-2867.053560555894819)$$

$$V_{22}(\text{Def2-SV(P)}) = -5733.941444150037569$$

$$= (-5733.763712038402446) - (-2866.875564021395348) + (-2867.053296133030926)$$

$$G(\text{Def2-SV(P)}) = -5733.042023102784$$

$$E(\text{Def2-SV(P)}) = -5733.945827427990480$$

5 2

|    |                 |                 |                 |
|----|-----------------|-----------------|-----------------|
| Co | -4.224691311278 | 0.561805332032  | 0.091775640689  |
| C  | -6.865592281047 | -3.114049418270 | 1.469581365109  |
| C  | -2.725467090719 | 1.089622941486  | 2.684467254420  |
| C  | -2.299845597749 | 0.784851227225  | 3.972448177941  |
| C  | -2.815553408044 | -0.351521525146 | 4.590209742855  |
| C  | -3.752385452373 | -1.127895783180 | 3.912904973850  |
| C  | -4.141055466068 | -0.748618381409 | 2.629505566531  |
| C  | -5.165547188405 | -1.456396919747 | 1.828812998656  |
| C  | -5.910160347644 | -2.533425722919 | 2.300138022268  |
| C  | -7.054533715658 | -2.599552655386 | 0.191556213454  |
| C  | -6.275095850425 | -1.523209005013 | -0.214250288510 |
| H  | -2.349061029430 | 1.971765348076  | 2.161490391477  |
| H  | -1.575978562096 | 1.430147375650  | 4.473220449542  |
| H  | -4.170555161826 | -2.015660853579 | 4.387121169700  |
| H  | -5.756609304961 | -2.917888232685 | 3.308314059367  |
| H  | -7.793260530320 | -3.018568700155 | -0.493222541811 |



|   |                 |                 |                 |
|---|-----------------|-----------------|-----------------|
| H | -6.387118080108 | -1.095073177441 | -1.211157348735 |
| N | -3.612992819531 | 0.335709335584  | 2.032495454569  |
| N | -5.353752152521 | -0.972515119920 | 0.581793636427  |
| C | -4.479986855107 | 0.299273616929  | -2.944448746408 |
| C | -4.975799439411 | 0.646976405693  | -4.195714812163 |
| C | -6.024174986339 | 1.558773651677  | -4.263859102741 |
| C | -6.545905450265 | 2.082425835499  | -3.083626853688 |
| C | -5.999438084088 | 1.680913765142  | -1.866967942256 |
| C | -6.486415285614 | 2.150963686093  | -0.550063517936 |
| C | -7.618733950132 | 2.944557723200  | -0.385668511953 |
| C | -8.007028856644 | 3.319258699759  | 0.897567844777  |
| C | -7.254114293343 | 2.888212379491  | 1.984612291234  |
| C | -6.136124932789 | 2.099062573255  | 1.746782185021  |
| C | -2.666922619309 | -1.888141338387 | -0.562560238069 |
| C | -1.601309115217 | -2.581181818802 | -1.123282538516 |
| C | -0.546837567311 | -1.855301137294 | -1.667495456601 |
| C | -0.582794953399 | -0.465252513768 | -1.608897807173 |
| C | -1.677687187842 | 0.162804129608  | -1.022076177770 |
| C | -1.826298752380 | 1.626897666482  | -0.898451459382 |
| C | -0.871459184841 | 2.548159326785  | -1.315628514105 |
| C | -1.109530940369 | 3.906817261948  | -1.123018598856 |
| C | -2.297382131765 | 4.305777589254  | -0.520524171505 |
| C | -3.211388308942 | 3.330787544300  | -0.138099013889 |
| H | -3.662179377254 | -0.417813996434 | -2.851356215399 |
| H | -4.540016057707 | 0.205382847101  | -5.093291724229 |
| H | -7.366188887560 | 2.799215901173  | -3.121156414811 |
| H | -8.204874516328 | 3.263403371111  | -1.247301587199 |
| H | -7.519738470219 | 3.153079906008  | 3.009124675529  |
| H | -5.518609843145 | 1.746237207822  | 2.573567345625  |
| H | -3.520066331168 | -2.425795100886 | -0.147790371505 |
| H | -1.614260869242 | -3.671872679735 | -1.136417528372 |
| H | 0.229202632527  | 0.121894247454  | -2.034768342142 |
| H | 0.054120216078  | 2.219619162929  | -1.786597541662 |
| H | -2.527041279807 | 5.357776696712  | -0.345138915100 |
| H | -4.153576012825 | 3.605345195488  | 0.338462156590  |
| N | -4.977395054821 | 0.806062638005  | -1.814334562069 |

|    |                 |                 |                 |
|----|-----------------|-----------------|-----------------|
| N  | -5.760877771419 | 1.745211832322  | 0.513283143343  |
| N  | -2.707211088617 | -0.551741557186 | -0.522678879643 |
| N  | -2.980214159491 | 2.027407461644  | -0.322382381329 |
| H  | -7.458495654331 | -3.959605483148 | 1.824740117982  |
| H  | -2.497931285730 | -0.631888079050 | 5.596886574507  |
| H  | -0.367871611410 | 4.642626571551  | -1.441336175370 |
| H  | 0.297067416587  | -2.365863947169 | -2.137008670299 |
| H  | -6.438570127532 | 1.863234462124  | -5.227479101374 |
| H  | -8.894270366998 | 3.939528134072  | 1.042186104505  |
| Co | 4.231366779531  | -0.583975210894 | -0.089517927302 |
| C  | 8.685650750761  | 0.705885716406  | -1.150252854567 |
| C  | 4.519133101996  | -0.769645266450 | 2.947230638658  |
| C  | 5.154674273675  | -0.545319779357 | 4.162987245499  |
| C  | 6.448010565636  | -0.033366282508 | 4.150774284288  |
| C  | 7.063356538995  | 0.225805994915  | 2.928738535970  |
| C  | 6.363473722755  | -0.029720488938 | 1.751932686938  |
| C  | 6.924059644843  | 0.185776177220  | 0.398486752937  |
| C  | 8.248207968430  | 0.546210308205  | 0.161653811612  |
| C  | 7.788278802114  | 0.497752818409  | -2.192274559438 |
| C  | 6.482176803902  | 0.141188533635  | -1.882032057440 |
| H  | 3.506610811909  | -1.176290655052 | 2.918402929829  |
| H  | 4.635053637195  | -0.770611766191 | 5.095617559650  |
| H  | 8.076115092609  | 0.627631107245  | 2.903059598990  |
| H  | 8.941821436969  | 0.693699581416  | 0.989277650719  |
| H  | 8.084443807271  | 0.607189243876  | -3.236610325238 |
| H  | 5.748804601752  | -0.024653355899 | -2.672086321039 |
| N  | 5.107594179111  | -0.514761148847 | 1.776553039657  |
| N  | 6.061282508612  | -0.004367703721 | -0.621504912125 |
| C  | 2.919206955565  | 0.319027966938  | -2.679213162582 |
| C  | 2.389834205917  | 0.130079354793  | -3.950703079780 |
| C  | 2.466225134899  | -1.138429335367 | -4.519303237228 |
| C  | 3.088076919796  | -2.164122499922 | -3.811641951248 |
| C  | 3.610196742480  | -1.892475527582 | -2.548558494136 |
| C  | 4.350096636631  | -2.875713238002 | -1.725984972317 |
| C  | 4.649212053528  | -4.169033834735 | -2.143702749957 |
| C  | 5.378177111958  | -5.004001394158 | -1.300483546005 |

|   |                 |                 |                 |
|---|-----------------|-----------------|-----------------|
| C | 5.792898277558  | -4.522993991965 | -0.063337490589 |
| C | 5.456016060974  | -3.222535205129 | 0.291551068872  |
| C | 4.195507879327  | 2.368651133050  | -0.009781689998 |
| C | 3.651572784172  | 3.610977204094  | 0.294818661616  |
| C | 2.404118636809  | 3.661313183309  | 0.907034287360  |
| C | 1.742509967765  | 2.470051758286  | 1.194828033804  |
| C | 2.345970549115  | 1.262328994241  | 0.858898502233  |
| C | 1.739942205949  | -0.061978253356 | 1.102154976481  |
| C | 0.536626101716  | -0.257124751361 | 1.773811760984  |
| C | 0.061217384331  | -1.551834476431 | 1.956741716528  |
| C | 0.796067536269  | -2.617506700527 | 1.447783981220  |
| C | 1.995227106226  | -2.349507865570 | 0.798030787537  |
| H | 2.877799379622  | 1.297628993068  | -2.195925264642 |
| H | 1.923820855998  | 0.966524592625  | -4.474229216314 |
| H | 3.165069096011  | -3.159477124251 | -4.248915508358 |
| H | 4.324727921464  | -4.528732567487 | -3.119981438145 |
| H | 6.368853618088  | -5.138952303553 | 0.628790963273  |
| H | 5.753103747319  | -2.810358991490 | 1.256738848550  |
| H | 5.168730157614  | 2.290467556835  | -0.496231097371 |
| H | 4.207300257092  | 4.517037437780  | 0.049195819565  |
| H | 0.763069567081  | 2.492129475062  | 1.673017656547  |
| H | -0.015769685732 | 0.594065393605  | 2.168370404097  |
| H | 0.460613016440  | -3.649822763635 | 1.556854088812  |
| H | 2.604925140502  | -3.164300769245 | 0.406265132015  |
| N | 3.502383980896  | -0.669228872491 | -1.997420718047 |
| N | 4.750331496510  | -2.425702988837 | -0.516588845089 |
| N | 3.557193912334  | 1.226259495039  | 0.262634602283  |
| N | 2.458748084307  | -1.105135408485 | 0.639773059081  |
| H | 9.721791956309  | 0.986388294166  | -1.351761359663 |
| H | 6.980279160323  | 0.163648261719  | 5.083953322125  |
| H | -0.873413816350 | -1.727763703050 | 2.494617060491  |
| H | 1.942617636799  | 4.618325129455  | 1.159878464965  |
| H | 2.052104521036  | -1.331052800119 | -5.511339382415 |
| H | 5.620769675287  | -6.021461917099 | -1.614626881265 |

[Ru(bpy)<sub>3</sub>]<sup>3+/2+</sup>

$$V_{11}(\text{Def2-SV(P)}) = -3158.534930053921926$$

$$= (-3158.324716574271861) - (-1579.155880982988037) + (-1579.366094462637875)$$

$$V_{22}(\text{Def2-SV(P)}) = -3158.534930052838718$$

$$= (-3158.324716574271861) - (-1579.155863825897995) + (-1579.366077304465080)$$

$$G(\text{Def2-SV(P)}) = -3157.634555606114$$

$$E(\text{Def2-SV(P)}) = -3158.539031875176079$$

5 2

|    |                 |                 |                 |
|----|-----------------|-----------------|-----------------|
| Ru | -4.299861001233 | 0.601235307592  | 0.077220758899  |
| C  | -7.013807055345 | -3.157314961610 | 1.499954950822  |
| C  | -2.789111948976 | 0.989512951560  | 2.706099955904  |
| C  | -2.401729468415 | 0.693018840971  | 4.005422906422  |
| C  | -2.969468994056 | -0.413204105599 | 4.633552804305  |
| C  | -3.919131095244 | -1.167455143613 | 3.951756885238  |
| C  | -4.273815843482 | -0.806733804881 | 2.652792652259  |
| C  | -5.307418521679 | -1.503425017382 | 1.856436345124  |
| C  | -6.041380341121 | -2.591531889648 | 2.320404199124  |
| C  | -7.233130238547 | -2.618054766500 | 0.236344264584  |
| C  | -6.464966741019 | -1.533654252605 | -0.166792403230 |
| H  | -2.377416380526 | 1.848244126475  | 2.172166895192  |
| H  | -1.665385133839 | 1.322101369534  | 4.508229377098  |
| H  | -4.381269265533 | -2.026799846215 | 4.436922699285  |
| H  | -5.863879267266 | -2.999650168205 | 3.315139994977  |
| H  | -7.986800223469 | -3.025961837826 | -0.438806027568 |
| H  | -6.595132043432 | -1.083677362429 | -1.152686915788 |
| N  | -3.691420043834 | 0.251815700873  | 2.044272207608  |
| N  | -5.523423282746 | -0.996207739503 | 0.619163278498  |
| C  | -4.613030025309 | 0.453340835626  | -2.967157676157 |
| C  | -5.152674230177 | 0.773401121153  | -4.205479492875 |
| C  | -6.234827742162 | 1.646409498817  | -4.254856095275 |
| C  | -6.743268739327 | 2.162562310613  | -3.066673076936 |
| C  | -6.157800037551 | 1.797318542004  | -1.856880412692 |
| C  | -6.627976812524 | 2.278142391051  | -0.539772891097 |
| C  | -7.741015913573 | 3.097296404388  | -0.367123752074 |
| C  | -8.110286742564 | 3.485158745699  | 0.917476993714  |
| C  | -7.358734238624 | 3.042901480010  | 2.001925825368  |
| C  | -6.262491737502 | 2.226177662561  | 1.761757636160  |

|    |                 |                 |                 |
|----|-----------------|-----------------|-----------------|
| C  | -2.668241760430 | -1.889095509678 | -0.621868866130 |
| C  | -1.614836973900 | -2.600602907654 | -1.178562664725 |
| C  | -0.543065107163 | -1.892576850594 | -1.714167305359 |
| C  | -0.555364354887 | -0.502368013799 | -1.659306309964 |
| C  | -1.642085415349 | 0.152569745647  | -1.083894954543 |
| C  | -1.754980879461 | 1.624133759570  | -0.974132875527 |
| C  | -0.768930330503 | 2.510559220222  | -1.398663734233 |
| C  | -0.961342044156 | 3.878926907183  | -1.229374259043 |
| C  | -2.139893176914 | 4.329650148097  | -0.644162301545 |
| C  | -3.089455456925 | 3.393295278730  | -0.254948903014 |
| H  | -3.768326936563 | -0.232575084475 | -2.885445515099 |
| H  | -4.722865446433 | 0.339554815472  | -5.109520662418 |
| H  | -7.590187164370 | 2.847763370916  | -3.090395365930 |
| H  | -8.325980079142 | 3.430400924237  | -1.224128848583 |
| H  | -7.611048438864 | 3.320235782112  | 3.026474954440  |
| H  | -5.643836635115 | 1.858224091330  | 2.581923024751  |
| H  | -3.535986003434 | -2.403615097111 | -0.206441495181 |
| H  | -1.646331591769 | -3.690887300683 | -1.191923872958 |
| H  | 0.273397245844  | 0.064373217426  | -2.079992945135 |
| H  | 0.148303091324  | 2.147340142889  | -1.859790403300 |
| H  | -2.334425720746 | 5.391936166137  | -0.489740888421 |
| H  | -4.030625248957 | 3.700471610052  | 0.205376168777  |
| N  | -5.100350304350 | 0.952505652789  | -1.823620818409 |
| N  | -5.904684251880 | 1.856885545577  | 0.524429268940  |
| N  | -2.686078955584 | -0.549197946343 | -0.585716031918 |
| N  | -2.900064839305 | 2.077619631456  | -0.412865414690 |
| H  | -7.596294368452 | -4.011682485765 | 1.851195945153  |
| H  | -2.683388767370 | -0.684698894663 | 5.651895144780  |
| H  | -0.192134813772 | 4.583054079452  | -1.553851745802 |
| H  | 0.296939545747  | -2.418698887572 | -2.172704063809 |
| H  | -6.685069214619 | 1.925818560010  | -5.209796145760 |
| H  | -8.981754629302 | 4.126473110513  | 1.065730416574  |
| Ru | 4.306571056001  | -0.591551261419 | -0.061732799135 |
| C  | 8.883132822695  | 0.655029332445  | -1.079678820214 |
| C  | 4.616328311955  | -0.675752135943 | 2.987574142820  |
| C  | 5.265367904175  | -0.508245249055 | 4.203192079132  |

|   |                 |                 |                 |
|---|-----------------|-----------------|-----------------|
| C | 6.593185379969  | -0.092809269668 | 4.197583996622  |
| C | 7.226423355887  | 0.134826108304  | 2.979368832404  |
| C | 6.518200770789  | -0.054449141539 | 1.795054291624  |
| C | 7.099014695842  | 0.150632160222  | 0.450398969298  |
| C | 8.428248101657  | 0.501262910806  | 0.226635895790  |
| C | 7.998285037353  | 0.452229523902  | -2.134358240573 |
| C | 6.686424276330  | 0.104692450546  | -1.843343870877 |
| H | 3.577139015945  | -1.006173542849 | 2.948923979189  |
| H | 4.728253944254  | -0.703302478348 | 5.132562789911  |
| H | 8.266515671671  | 0.459280757195  | 2.960148416190  |
| H | 9.112580093363  | 0.650990970052  | 1.061320301807  |
| H | 8.310248355939  | 0.559360417311  | -3.174286267651 |
| H | 5.957198925401  | -0.058849565449 | -2.638569156196 |
| N | 5.224429426364  | -0.453568469909 | 1.815032388124  |
| N | 6.247579104025  | -0.037347436297 | -0.585384187123 |
| C | 2.970615433046  | 0.197064157008  | -2.692758570310 |
| C | 2.480160888525  | 0.008043784288  | -3.977210731145 |
| C | 2.613472042228  | -1.248666985056 | -4.562249831202 |
| C | 3.249862308234  | -2.262619945211 | -3.853016071038 |
| C | 3.730924163203  | -2.002380169379 | -2.571001487063 |
| C | 4.464734688707  | -2.989301216044 | -1.748782183226 |
| C | 4.764544951303  | -4.281994517897 | -2.170503299514 |
| C | 5.487994871472  | -5.122864955600 | -1.329140637132 |
| C | 5.899931592480  | -4.650024575457 | -0.087111419469 |
| C | 5.566376388824  | -3.351293248083 | 0.273835869542  |
| C | 4.209597198807  | 2.461588353560  | 0.094782117228  |
| C | 3.661227896222  | 3.702916367736  | 0.392021476461  |
| C | 2.394574639583  | 3.752433341896  | 0.965305482178  |
| C | 1.719661443688  | 2.562452197880  | 1.223782281264  |
| C | 2.323925650426  | 1.351590724860  | 0.895962071385  |
| C | 1.693904944912  | 0.031545431242  | 1.117852431922  |
| C | 0.468208197947  | -0.143665404992 | 1.756325731411  |
| C | -0.037819029355 | -1.427741491236 | 1.928423033331  |
| C | 0.685096561567  | -2.511032310009 | 1.438777587882  |
| C | 1.902176086827  | -2.269557727166 | 0.815566080945  |
| H | 2.893755319563  | 1.165519995043  | -2.194905199436 |

|   |                 |                 |                 |
|---|-----------------|-----------------|-----------------|
| H | 2.001341048141  | 0.837295707584  | -4.500289969842 |
| H | 3.371941532213  | -3.247033245185 | -4.304168525195 |
| H | 4.442417542259  | -4.638609644222 | -3.148600711503 |
| H | 6.471936709754  | -5.272314354092 | 0.602679711982  |
| H | 5.860409178882  | -2.939337041008 | 1.241101458999  |
| H | 5.198774328840  | 2.374438226538  | -0.359064033908 |
| H | 4.227314509189  | 4.609412829141  | 0.173012833331  |
| H | 0.726897823279  | 2.588039233306  | 1.673361426102  |
| H | -0.078182230545 | 0.717719811271  | 2.136519045043  |
| H | 0.323952193555  | -3.535280048694 | 1.541284419522  |
| H | 2.510925221701  | -3.090909321001 | 0.434096261275  |
| N | 3.568772095682  | -0.784418254276 | -2.004073062697 |
| N | 4.862273941210  | -2.546544957436 | -0.532402726279 |
| N | 3.554869568845  | 1.318590485614  | 0.334465252588  |
| N | 2.399317073793  | -1.033299372748 | 0.673043274167  |
| H | 9.923505553894  | 0.928921304367  | -1.267638965339 |
| H | 7.137528332711  | 0.053634132853  | 5.132955533166  |
| H | -0.988705367533 | -1.582712347640 | 2.444109393825  |
| H | 1.929043442990  | 4.709106432575  | 1.211919535933  |
| H | 2.232841011865  | -1.439927667708 | -5.567772035547 |
| H | 5.728672822551  | -6.139388348791 | -1.647777319154 |

**6. Cartesian coordinates and energies of MESX geometries with metal-metal distances showing maximum electron self-exchange reaction rate constants at the U $\omega$ B97X-D/Def2-TZVP//Def2-SV(P) level**

The MESX geometries by EDEEL with the optimized metal-metal distance and energy components in these geometries are presented below. These energy components are:

$$V_{11} = E_{n+m}^C - E_n^D + E_{n+1}^D$$

$$V_{22} = E_{n+m}^C - E_m^A + E_{m+1}^A$$

In the following, energy values at the U $\omega$ B97X-D/Def2-SV(P) and U $\omega$ B97X-D/Def2-TZVP//Def2-SV(P) levels are given in Hartree. Note that the Gibbs energy values are before adding the entropy correction of -4.3 kcal/mol.

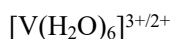

$$V_{11}(\text{Def2-SV(P)}) = -2803.296181942368094$$

$$= (-2803.084499945237894) - (-1401.541195367326054) + (-1401.752877364456026)$$

$$V_{22}(\text{Def2-SV(P)}) = -2803.296181947372133$$

$$= (-2803.084499945237894) - (-1401.540827316790001) + (-1401.752509318924012)$$

$$G(\text{Def2-SV(P)}) = -2803.059031293702$$

$$E(\text{Def2-SV(P)}) = -2803.304923570243318$$

$$V_{11}(\text{Def2-TZVP}) = -2804.846078668189875$$

$$= (-2804.636443683074049) - (-1402.320906117945015) + (-1402.530541103061068)$$

$$V_{22}(\text{Def2-TZVP}) = -2804.846077006023734$$

$$= (-2804.636443683074049) - (-1402.320562958051141) + (-1402.530196281001054)$$

$$E(\text{Def2-TZVP}) = -2804.854620017075376$$

5 6

$$V \quad -2.677379515715 \quad -0.066131263419 \quad -0.060739331285$$

$$O \quad -1.096520018153 \quad -1.288518230528 \quad -0.879393916815$$

$$O \quad -2.512685519260 \quad -1.171566058420 \quad 1.678413928616$$

$$O \quad -4.159169304948 \quad 1.151831711172 \quad 0.689070421844$$

$$O \quad -2.806664010854 \quad 1.012614692366 \quad -1.817067027713$$

$$O \quad -1.179886209743 \quad 1.142047644987 \quad 0.676926959424$$

$$O \quad -4.153039188103 \quad -1.287948551848 \quad -0.808393300857$$

$$H \quad -4.100103755466 \quad -2.242169724013 \quad -0.994084236977$$

$$H \quad -1.229829199700 \quad -1.651925865037 \quad -1.777343844724$$

$$H \quad -3.048740672167 \quad -1.960741578710 \quad 1.874445792561$$

$$H \quad -4.533108693044 \quad 1.887612644956 \quad 0.171959732691$$

$$H \quad -3.162802960470 \quad 0.641892128383 \quad -2.643950426656$$



|   |                 |                 |                 |
|---|-----------------|-----------------|-----------------|
| H | -1.302831985215 | 2.074972148869  | 0.927402968765  |
| H | -0.849315323605 | -2.045315137011 | -0.310903081945 |
| H | -2.200803378476 | -0.794024318374 | 2.520168916114  |
| H | -4.324720483227 | 1.316627507810  | 1.634084180525  |
| H | -2.291275782716 | 1.811543643000  | -2.025896666495 |
| H | -0.289702422644 | 0.852933741723  | 0.972628140721  |
| H | -5.091451646351 | -1.028510463431 | -0.778606587543 |
| V | 3.073515774925  | 0.134301213719  | 0.052212524595  |
| O | 4.539693208178  | 0.138692859267  | -1.406500294928 |
| O | 3.086619099149  | -1.918616035489 | 0.195303597927  |
| O | 1.510734888428  | 0.253439724668  | 1.555513348301  |
| O | 3.037168131195  | 2.183202858348  | -0.009732185067 |
| O | 4.649034240142  | 0.180249684988  | 1.373382467355  |
| O | 1.530319012898  | 0.049561560599  | -1.313983252377 |
| H | 1.658809005916  | 0.178690286283  | -2.270660980423 |
| H | 4.669859178638  | 0.884781909895  | -2.018808845210 |
| H | 2.461442852797  | -2.528510286933 | -0.234976339910 |
| H | 1.661743481443  | 0.937870364420  | 2.237632685924  |
| H | 2.287773530769  | 2.722076732977  | -0.319824336908 |
| H | 4.640966461132  | 0.001643306092  | 2.330108511458  |
| H | 4.860525148380  | -0.672914080142 | -1.838678540668 |
| H | 3.841813284820  | -2.430532419262 | 0.536208670156  |
| H | 1.333370700289  | -0.577993334120 | 2.039123789336  |
| H | 3.770200839406  | 2.770591302536  | 0.247066804441  |
| H | 5.570695051483  | 0.263496722000  | 1.070146595442  |
| H | 0.648789626273  | -0.356875759746 | -1.173214309016 |

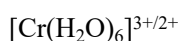

$$V_{11}(\text{Def2-SV(P)}) = -3004.139754301838366$$

$$= (-3003.930042615800176) - (-1501.962125637149029) + (-1502.171837323186992)$$

$$V_{22}(\text{Def2-SV(P)}) = -3004.139754307990188$$

$$= (-3003.930042615800176) - (-1501.962521647953054) + (-1502.172233340143066)$$

$$G(\text{Def2-SV(P)}) = -3003.901899362690$$

$$E(\text{Def2-SV(P)}) = -3004.150332712851196$$

$$V_{11}(\text{Def2-TZVP}) = -3005.738695083419316$$

$$= (-3005.539013585035264) - (-1502.770904864552904) + (-1502.970586362936956)$$

$$V_{22}(\text{Def2-TZVP}) = -3005.738744723481432$$

$$= (-3005.539013585035264) - (-1502.770999265829914) + (-1502.970730404276082)$$

$$E(\text{Def2-TZVP}) = -3005.748685320941149$$

5 8

|    |                 |                 |                 |
|----|-----------------|-----------------|-----------------|
| Cr | -2.656543978072 | -0.350718209000 | 0.013503254378  |
| O  | -0.925284680509 | 0.116785005124  | -1.342627942814 |
| O  | -2.299467515354 | -2.312051529692 | -0.284646790353 |
| O  | -4.266403063062 | -0.716221294742 | 1.317691142331  |
| O  | -2.892638335710 | 1.635377727440  | 0.227978212610  |
| O  | -1.274555866767 | -0.321460651181 | 1.497731224385  |
| O  | -4.061075276682 | -0.306681581265 | -1.449075547048 |
| H  | -3.912575190788 | -0.410837782545 | -2.406572412839 |
| H  | -1.129861721049 | 0.784018723588  | -2.027748013614 |
| H  | -2.876509644585 | -2.867041477789 | -0.840898649478 |
| H  | -4.602705452683 | -0.023810923628 | 1.915248830066  |
| H  | -3.649712957878 | 2.126719891311  | -0.138839675969 |
| H  | -1.537108169953 | -0.423070724671 | 2.430528565055  |
| H  | -0.601405479988 | -0.671913498785 | -1.822438312885 |
| H  | -1.891922396809 | -2.872084686108 | 0.401376641161  |
| H  | -4.409268855747 | -1.580846533521 | 1.743724611009  |
| H  | -2.484157063465 | 2.147055486832  | 0.949197840904  |
| H  | -0.320184612983 | -0.552132469023 | 1.411956721234  |
| H  | -4.974195225562 | -0.573583511824 | -1.235339780838 |
| Cr | 2.997397823256  | 0.467990172602  | 0.597641083737  |
| O  | 4.381895116477  | 1.908784052696  | -0.072014699251 |
| O  | 3.207403838231  | -0.699363593849 | -1.037613583824 |
| O  | 1.506933440870  | -1.043060465980 | 1.332832220565  |
| O  | 2.747503703307  | 1.599687524294  | 2.248091355287  |
| O  | 4.625516799990  | -0.376840369035 | 1.458329178782  |
| O  | 1.372660927522  | 1.373348257445  | -0.208607833715 |
| H  | 1.451495435919  | 2.238330256624  | -0.650222204359 |
| H  | 4.382466540241  | 2.792444290372  | 0.339281377676  |
| H  | 2.827860697207  | -0.461115456269 | -1.903606708311 |
| H  | 1.640078055690  | -1.341905423304 | 2.254681684932  |
| H  | 1.895018378394  | 2.024075195744  | 2.455809245474  |
| H  | 4.721443275070  | -1.289366788997 | 1.786090307427  |

|   |                |                 |                 |
|---|----------------|-----------------|-----------------|
| H | 4.619436646222 | 2.009063415414  | -1.011801157245 |
| H | 4.011322071059 | -1.231118344509 | -1.183406603979 |
| H | 1.533649804692 | -1.851986706320 | 0.782972239046  |
| H | 3.217074703743 | 1.395714995472  | 3.077572897713  |
| H | 5.505923875065 | -0.010477841364 | 1.254635363178  |
| H | 0.569173465677 | 0.916156691630  | -0.554373635679 |

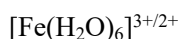

$$V_{11}(\text{Def2-SV(P)}) = -3442.564059368042763$$

$$= (-3442.309547743726398) - (-1721.152055919432996) + (-1721.406567543749134)$$

$$V_{22}(\text{Def2-SV(P)}) = -3442.564059383635140$$

$$= (-3442.309547743726398) - (-1721.152221164654975) + (-1721.406732804563944)$$

$$G(\text{Def2-SV(P)}) = -3442.330578276707$$

$$E(\text{Def2-SV(P)}) = -3442.573169202407826$$

$$V_{11}(\text{Def2-TZVP}) = -3444.200836273666027$$

$$= (-3443.945178317925183) - (-1721.974195002464967) + (-1722.229852958206038)$$

$$V_{22}(\text{Def2-TZVP}) = -3444.200942746221244$$

$$= (-3443.945178317925183) - (-1721.974236785948960) + (-1722.230001214245021)$$

$$E(\text{Def2-TZVP}) = -3444.209800469885067$$

5 10

|    |                 |                 |                 |
|----|-----------------|-----------------|-----------------|
| Fe | -2.653830416987 | -0.020018274619 | -0.232500451317 |
| O  | -0.954233781851 | 1.318655403758  | -0.619523689262 |
| O  | -2.384835693331 | -0.893392495909 | -2.060145456693 |
| O  | -4.176569599305 | -1.313925630436 | 0.239727937952  |
| O  | -2.867241117641 | 0.918327097213  | 1.566552999828  |
| O  | -1.195001514160 | -1.251163567918 | 0.546694838174  |
| O  | -4.038015458047 | 1.266833652308  | -1.035920848597 |
| H  | -3.902600573269 | 1.946180685197  | -1.721033883289 |
| H  | -1.121920638117 | 2.266161734012  | -0.443206467471 |
| H  | -2.905435287191 | -0.683801999514 | -2.856771685114 |
| H  | -4.565343567762 | -1.385835558401 | 1.130219409427  |
| H  | -3.469966961536 | 1.665383482584  | 1.733043327864  |
| H  | -1.391808297838 | -1.963103599473 | 1.181784649161  |
| H  | -0.631248463381 | 1.269833812615  | -1.542191663032 |
| H  | -1.882977394391 | -1.713451660730 | -2.217724504448 |
| H  | -4.412828088171 | -2.106184798585 | -0.275694695846 |

|    |                 |                 |                 |
|----|-----------------|-----------------|-----------------|
| H  | -2.308253460051 | 0.776236838423  | 2.351507132319  |
| H  | -0.269889200834 | -1.366715289685 | 0.232175926521  |
| H  | -4.996054421549 | 1.134227556433  | -0.915973525266 |
| Fe | 3.009327852061  | -0.289741128079 | 0.561198072691  |
| O  | 4.291095400448  | 0.965388658293  | 1.575694871371  |
| O  | 3.277661478646  | 0.783319656013  | -1.157808902685 |
| O  | 1.544618681808  | -1.603058903953 | -0.404370858444 |
| O  | 2.736159711086  | -1.408740851073 | 2.251042024103  |
| O  | 4.648197063684  | -1.444895075776 | 0.116311258203  |
| O  | 1.364015836101  | 0.863618200894  | 1.000826438251  |
| H  | 1.338875564213  | 1.479305173569  | 1.754780856984  |
| H  | 4.393731342892  | 0.953515041613  | 2.544223746524  |
| H  | 2.781101487814  | 1.581818935293  | -1.412062055734 |
| H  | 1.674017578154  | -2.559448209003 | -0.244859732589 |
| H  | 1.960477963386  | -1.382087310597 | 2.839429675102  |
| H  | 4.764132064208  | -2.098707658863 | -0.596215884325 |
| H  | 4.590283064444  | 1.828114353504  | 1.237116944110  |
| H  | 3.997507607586  | 0.639717266306  | -1.798249044820 |
| H  | 1.484639180927  | -1.495187876832 | -1.374900105714 |
| H  | 3.314705394930  | -2.145672842457 | 2.517218971476  |
| H  | 5.516513993268  | -1.257372185674 | 0.516336439244  |
| H  | 0.563539584644  | 1.017767912535  | 0.447416925871  |

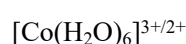

$$V_{11}(\text{Def2-SV(P)}) = -3680.603277256203000$$

$$= (-3680.299330647796978) - (-1840.146592891019964) + (-1840.450539499425986)$$

$$V_{22}(\text{Def2-SV(P)}) = -3680.603277250324027$$

$$= (-3680.299330647796978) - (-1840.146903951404965) + (-1840.450850553932014)$$

$$G(\text{Def2-SV(P)}) = -3680.363843758238$$

$$E(\text{Def2-SV(P)}) = -3680.612399899715911$$

$$V_{11}(\text{Def2-TZVP}) = -3682.273694587239788$$

$$= (-3681.968069544014725) - (-1840.985395121952934) + (-1841.291020165177997)$$

$$V_{22}(\text{Def2-TZVP}) = -3682.273706863079497$$

$$= (-3681.968069544014725) - (-1840.985531665186045) + (-1841.291168984251044)$$

$$E(\text{Def2-TZVP}) = -3682.282671299707999$$

5 8

|    |                 |                 |                 |
|----|-----------------|-----------------|-----------------|
| Co | -2.638734439171 | -0.046474449081 | -0.060421456864 |
| O  | -1.154908603427 | 0.126287247696  | -1.619694872560 |
| O  | -2.512000448543 | -2.054810644194 | -0.081930864851 |
| O  | -3.881584924459 | -0.192379202411 | 1.565334937305  |
| O  | -2.694206023724 | 1.971237613076  | -0.057092809333 |
| O  | -1.114553009080 | 0.036427768464  | 1.258292861200  |
| O  | -4.160516029623 | -0.157130382193 | -1.371425939295 |
| H  | -4.208080336111 | 0.239185916305  | -2.260446899037 |
| H  | -1.005286059729 | 1.063408127592  | -1.860027887152 |
| H  | -2.855505936603 | -2.610637127187 | -0.805622202089 |
| H  | -4.474316633775 | 0.539137416020  | 1.815975790653  |
| H  | -3.374525552041 | 2.495868247371  | -0.518788909125 |
| H  | -1.267504514792 | -0.189536345208 | 2.193790981550  |
| H  | -1.338092689953 | -0.342116878209 | -2.458623405688 |
| H  | -1.834493875141 | -2.554846522290 | 0.409650782274  |
| H  | -4.346358616041 | -1.031769589477 | 1.736070244861  |
| H  | -2.336639364138 | 2.501264452278  | 0.679399247953  |
| H  | -0.242659785450 | 0.488870825252  | 1.176619675290  |
| H  | -5.024051073312 | -0.559849772114 | -1.165813314032 |
| Co | 2.889404874237  | -0.007414044834 | 0.068011739692  |
| O  | 4.255197647908  | -1.248202110550 | -0.814482570937 |
| O  | 2.770912142746  | -1.322256502132 | 1.596668105054  |
| O  | 1.457201113190  | 1.254240829529  | 1.056905800575  |
| O  | 2.893634798379  | 1.386307580645  | -1.398650061037 |
| O  | 4.449298179277  | 0.878408689977  | 0.992593434051  |
| O  | 1.360325702732  | -0.929644506370 | -0.869224031776 |
| H  | 1.438327793880  | -1.831654425102 | -1.228718204900 |
| H  | 4.321780420565  | -1.377656661036 | -1.777639505077 |
| H  | 2.014863863283  | -1.923061845418 | 1.730390313669  |
| H  | 1.335939991193  | 2.101589188206  | 0.582649191354  |
| H  | 2.486380563157  | 1.219752977166  | -2.269045764852 |
| H  | 4.520139360856  | 1.793641535836  | 1.319689469487  |
| H  | 4.472201007159  | -2.091061816442 | -0.375791276965 |
| H  | 3.226371888867  | -1.188338835965 | 2.448430391390  |
| H  | 1.633336044419  | 1.483850361042  | 1.991168251214  |
| H  | 3.629337663469  | 2.015846496606  | -1.517196055136 |

|   |                |                 |                 |
|---|----------------|-----------------|-----------------|
| H | 5.344203383331 | 0.497768986874  | 0.925546653915  |
| H | 0.496735643630 | -0.550301188397 | -1.161950584564 |

[Ru(H<sub>2</sub>O)<sub>6</sub>]<sup>3+/2+</sup>

$V_{11}(\text{Def2-SV(P)}) = -1105.127096592040743$   
 $= (-1104.897705759668952) - (-552.447662737883434) + (-552.677053570255111)$

$V_{22}(\text{Def2-SV(P)}) = -1105.127096573187146$   
 $= (-1104.897705759668952) - (-552.446731328079522) + (-552.676122141597716)$

$G(\text{Def2-SV(P)}) = -1104.872666924485$

$E(\text{Def2-SV(P)}) = -1105.135776920141097$

$V_{11}(\text{Def2-TZVP}) = -1106.476261377968967$   
 $= (-1106.247466132030013) - (-553.126046076230750) + (-553.354841322169818)$

$V_{22}(\text{Def2-TZVP}) = -1106.476088810093188$   
 $= (-1106.247466132030013) - (-553.125612457415400) + (-553.354235135478689)$

$E(\text{Def2-TZVP}) = -1106.484637503499016$

5 2

|    |                 |                 |                 |
|----|-----------------|-----------------|-----------------|
| Ru | -2.690204144839 | 0.047992392758  | -0.151650344202 |
| O  | -1.061261508207 | -0.421963935641 | -1.487566926934 |
| O  | -2.506686716974 | -1.984268280026 | 0.398865059004  |
| O  | -4.279196297035 | 0.541720646070  | 1.109733178692  |
| O  | -2.848850380568 | 2.076493203697  | -0.680044830880 |
| O  | -1.180040107770 | 0.566324679969  | 1.183953284621  |
| O  | -4.197664758531 | -0.324159022638 | -1.537454055834 |
| H  | -4.145913621010 | -1.038692829876 | -2.198338951537 |
| H  | -1.200743533317 | -0.170548571132 | -2.422373504578 |
| H  | -3.174684300424 | -2.609058614372 | 0.060520848695  |
| H  | -4.443117737274 | 1.501951999989  | 1.177490426189  |
| H  | -3.110787761861 | 2.262384638271  | -1.601135731810 |
| H  | -1.381173584230 | 1.006788192572  | 2.029282632092  |
| H  | -0.882431707124 | -1.384613172501 | -1.482720659280 |
| H  | -2.383802410436 | -2.183727000573 | 1.345401524398  |
| H  | -4.343725567338 | 0.155097372349  | 2.002523792332  |
| H  | -2.081763031547 | 2.641008112458  | -0.469968915904 |
| H  | -0.360367170673 | 0.035778577090  | 1.290551578619  |
| H  | -5.111899789222 | -0.274078612571 | -1.199412411557 |
| Ru | 3.075418088635  | 0.001680422249  | 0.188591542727  |

|   |                |                 |                 |
|---|----------------|-----------------|-----------------|
| O | 4.656503660094 | 0.723519566421  | -0.985337430138 |
| O | 3.141314173683 | -1.641258967497 | -1.105492368665 |
| O | 1.481456744668 | -0.694245272048 | 1.486305875166  |
| O | 3.001751174924 | 1.647643609557  | 1.466425876194  |
| O | 4.606520464966 | -0.738681616660 | 1.383284052440  |
| O | 1.560367854784 | 0.908019319117  | -0.940708965325 |
| H | 1.813754485081 | 1.416427857181  | -1.732121968622 |
| H | 4.775069399679 | 1.687819849205  | -1.065325917098 |
| H | 2.328423043516 | -2.125440319288 | -1.339207855851 |
| H | 1.661193266481 | -0.408023840826 | 2.405017750748  |
| H | 2.381007536334 | 2.362649553680  | 1.231905507232  |
| H | 4.535958532888 | -1.599150371839 | 1.835476012178  |
| H | 4.734866951108 | 0.340793373523  | -1.879877891862 |
| H | 3.859341318214 | -2.293112364282 | -1.003990902881 |
| H | 1.361794103957 | -1.664096604629 | 1.519849037653  |
| H | 3.826981115821 | 2.048665718378  | 1.796595726588  |
| H | 5.508331964353 | -0.643867445464 | 1.022818221104  |
| H | 0.719933235555 | 0.440748335779  | -1.136207248819 |

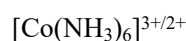

$$V_{11}(\text{Def2-SV(P)}) = -3442.695530426099140$$

$$= (-3442.509067802054233) - (-1721.257553427130006) + (-1721.444016051175140)$$

$$V_{22}(\text{Def2-SV(P)}) = -3442.695530512053665$$

$$= (-3442.509067802054233) - (-1721.257556486492831) + (-1721.444019196492036)$$

$$G(\text{Def2-SV(P)}) = -3442.273884660070$$

$$E(\text{Def2-SV(P)}) = -3442.698011813462017$$

$$V_{11}(\text{Def2-TZVP}) = -3444.016398017086885$$

$$= (-3443.826776513426012) - (-1721.916559940698107) + (-1722.106181444358981)$$

$$V_{22}(\text{Def2-TZVP}) = -3444.016421179060671$$

$$= (-3443.826776513426012) - (-1721.916566206672996) + (-1722.106210872307884)$$

$$E(\text{Def2-TZVP}) = -3444.018871317946832$$

5 4

|    |                |                |                 |
|----|----------------|----------------|-----------------|
| Co | 3.568130782296 | 0.133968334103 | 0.002149204446  |
| N  | 3.617333543871 | 1.701326269849 | -1.374941347570 |
| H  | 3.316282403230 | 2.599625160293 | -0.984380212699 |
| H  | 3.028573029945 | 1.542380992439 | -2.198785055695 |

|    |                 |                 |                 |
|----|-----------------|-----------------|-----------------|
| H  | 4.563461539970  | 1.862195005565  | -1.735783384883 |
| N  | 2.319183849381  | 1.215164503764  | 1.279386666096  |
| H  | 1.590610173907  | 0.619920179731  | 1.686676903688  |
| H  | 1.820639256778  | 1.981361680504  | 0.816382706624  |
| H  | 2.809907584549  | 1.638005897611  | 2.073584166909  |
| N  | 3.629407008200  | -1.439769260307 | 1.378374391538  |
| H  | 2.967634713225  | -2.194513034887 | 1.171716717729  |
| H  | 3.430255722763  | -1.149915016724 | 2.341289363203  |
| H  | 4.552704032711  | -1.884107449980 | 1.406209566686  |
| N  | 1.847459053030  | -0.615483941510 | -0.923426854143 |
| H  | 1.166734592885  | 0.119001179127  | -1.141943197841 |
| H  | 1.340448750283  | -1.298825759319 | -0.352224320477 |
| H  | 2.043985203055  | -1.089813173672 | -1.810384172729 |
| N  | 4.734647046298  | -1.035374174270 | -1.277955861027 |
| H  | 4.711168990568  | -0.718409564255 | -2.252319888105 |
| H  | 4.427062948481  | -2.013065096804 | -1.294689510639 |
| H  | 5.725951133304  | -1.062470286129 | -1.019511548515 |
| N  | 5.244876307882  | 0.959412715041  | 0.933958817022  |
| H  | 5.159475426638  | 1.970444219751  | 1.078936103776  |
| H  | 6.113092518886  | 0.830693184816  | 0.405012606696  |
| H  | 5.424110031923  | 0.557015444048  | 1.859237248513  |
| Co | -4.102843123670 | -0.149064007385 | -0.003231324909 |
| N  | -3.714779446770 | 0.984225694779  | -1.714196474766 |
| H  | -4.579156481812 | 1.281784175483  | -2.177745213643 |
| H  | -3.174762569649 | 0.486804839080  | -2.429031947438 |
| H  | -3.192790505562 | 1.844442421903  | -1.518888280197 |
| N  | -5.359536121910 | 1.379009303020  | 0.668772232661  |
| H  | -6.353635610750 | 1.193237596583  | 0.503530568872  |
| H  | -5.170241026795 | 2.279391876633  | 0.217297977757  |
| H  | -5.274689354826 | 1.545938335269  | 1.676435293612  |
| N  | -4.594218942081 | -1.245484980438 | 1.701533510598  |
| H  | -4.302063669580 | -2.226689807644 | 1.654177240125  |
| H  | -5.606437652765 | -1.263289010559 | 1.863599834708  |
| H  | -4.184199770832 | -0.870063998808 | 2.562343356252  |
| N  | -5.649598740809 | -1.083802844048 | -1.053999910058 |
| H  | -6.476018997770 | -0.493902827862 | -1.193288369307 |



|   |                 |                 |                 |
|---|-----------------|-----------------|-----------------|
| H | -5.990642127015 | -1.934337914187 | -0.595153243704 |
| H | -5.356315126226 | -1.372025767756 | -1.992842129320 |
| N | -2.797716858041 | -1.671501486361 | -0.600803868129 |
| H | -2.137674821749 | -1.377966295283 | -1.327767109862 |
| H | -3.274102231603 | -2.497468500453 | -0.976846717075 |
| H | -2.219105329482 | -2.011584211574 | 0.173761022846  |
| N | -2.485679811645 | 0.747414875262  | 0.975954600111  |
| H | -2.712408803757 | 1.657669084653  | 1.388985614713  |
| H | -1.695989832045 | 0.918645190832  | 0.344838428201  |
| H | -2.107446342589 | 0.178738422987  | 1.739817482979  |

[Ru(NH<sub>3</sub>)<sub>6</sub>]<sup>3+/2+</sup>

$V_{11}(\text{Def2-SV(P)}) = -867.286842991708227$

$= (-867.097269043261690) - (-433.551101521467444) + (-433.740675469914038)$

$V_{22}(\text{Def2-SV(P)}) = -867.286843058529371$

$= (-867.097269043261690) - (-433.551272959872335) + (-433.740846975140016)$

$G(\text{Def2-SV(P)}) = -866.864689878055$

$E(\text{Def2-SV(P)}) = -867.289462843897013$

$V_{11}(\text{Def2-TZVP}) = -868.284331261225134$

$= (-868.096881691556064) - (-434.051244550310230) + (-434.238694119979300)$

$V_{22}(\text{Def2-TZVP}) = -868.284403942727522$

$= (-868.096881691556064) - (-434.051427240277746) + (-434.238949491449148)$

$E(\text{Def2-TZVP}) = -868.286918899852935$

5 2

|    |                |                 |                 |
|----|----------------|-----------------|-----------------|
| Ru | 3.510336687685 | 0.088039151964  | -0.128177149946 |
| N  | 4.409701830095 | -0.135828840094 | -2.067555754803 |
| H  | 3.788418194111 | 0.144330579241  | -2.833269593943 |
| H  | 4.676336615073 | -1.104211948570 | -2.271968731586 |
| H  | 5.266736324279 | 0.413638748594  | -2.189557898956 |
| N  | 2.616966798203 | 1.953490366946  | -0.718896234029 |
| H  | 1.596726233077 | 1.911701528590  | -0.808777131978 |
| H  | 2.957889529446 | 2.295282761766  | -1.623467466108 |
| H  | 2.802149642791 | 2.710056014898  | -0.051977323327 |
| N  | 2.572561998190 | 0.273096355729  | 1.794495220449  |
| H  | 2.154463839649 | -0.606539015831 | 2.115781551373  |
| H  | 1.809779084212 | 0.957742683681  | 1.804639110619  |

|    |                 |                 |                 |
|----|-----------------|-----------------|-----------------|
| H  | 3.212396739531  | 0.555458108951  | 2.543803563872  |
| N  | 1.792016059956  | -0.975815052388 | -0.873589876962 |
| H  | 1.134732289900  | -0.371679582274 | -1.376834868196 |
| H  | 1.237709945045  | -1.423221024809 | -0.135990243736 |
| H  | 2.032553463737  | -1.724360128993 | -1.531378756110 |
| N  | 4.429361212279  | -1.755643441826 | 0.492821077689  |
| H  | 5.308398403991  | -1.948898449694 | 0.001879285068  |
| H  | 3.840550825294  | -2.579620082636 | 0.333413605440  |
| H  | 4.662846523291  | -1.772037052184 | 1.491039045934  |
| N  | 5.224060250730  | 1.162714722920  | 0.591521974525  |
| H  | 5.475042884267  | 1.956812837376  | -0.007206149236 |
| H  | 6.071143168053  | 0.589398531307  | 0.658271890495  |
| H  | 5.087185956529  | 1.565875172812  | 1.523839254340  |
| Ru | -3.870724997453 | -0.097809582745 | 0.143869366146  |
| N  | -4.310937891071 | 0.320144129152  | -1.921504135199 |
| H  | -5.279641080810 | 0.622112171547  | -2.066844609163 |
| H  | -4.177108123435 | -0.491209075075 | -2.533583347767 |
| H  | -3.730888859429 | 1.063767694062  | -2.322665769544 |
| N  | -4.991332301413 | 1.641916867457  | 0.723842312075  |
| H  | -6.004933131675 | 1.537129999081  | 0.614888503587  |
| H  | -4.743169077013 | 2.466453417582  | 0.166569584142  |
| H  | -4.843063800626 | 1.916292220574  | 1.700396883177  |
| N  | -3.476161401926 | -0.511219165576 | 2.217685093266  |
| H  | -3.106174089836 | -1.452276775485 | 2.385667659350  |
| H  | -4.315234721200 | -0.441292902658 | 2.802112239637  |
| H  | -2.792759410546 | 0.129260385358  | 2.634013539283  |
| N  | -5.645941578472 | -1.303300906443 | 0.242800549821  |
| H  | -6.413510731252 | -0.869342115275 | 0.765214882352  |
| H  | -5.481803399592 | -2.204181214312 | 0.704836213165  |
| H  | -6.030662350366 | -1.532458908877 | -0.679207753978 |
| N  | -2.714087989663 | -1.806200614549 | -0.480034451277 |
| H  | -2.025472929644 | -1.564953602495 | -1.200427545578 |
| H  | -3.279840844428 | -2.561169346295 | -0.880472861095 |
| H  | -2.174298076074 | -2.238647172931 | 0.276068247145  |
| N  | -2.051406993844 | 1.066439539992  | 0.074627941684  |
| H  | -2.104694640788 | 1.941853157777  | 0.605280061021  |

|   |                 |                |                 |
|---|-----------------|----------------|-----------------|
| H | -1.762595558341 | 1.335208019530 | -0.871328234572 |
| H | -1.254095861192 | 0.554140883317 | 0.465926352954  |

[Ru(NH<sub>3</sub>)<sub>5</sub>py]<sup>3+/2+</sup>

$V_{11}(\text{Def2-SV(P)}) = -1250.346425422224684$   
 $= (-1250.150762654413029)$   
 $- (-625.074001162632953) + (-625.269663930444608)$

$V_{22}(\text{Def2-SV(P)}) = -1250.346425431283478$   
 $= (-1250.150762654413029)$   
 $- (-625.073952937621698) + (-625.269615714492147)$

$G(\text{Def2-SV(P)}) = -1249.822084557713$

$E(\text{Def2-SV(P)}) = -1250.349471865552005$

$V_{11}(\text{Def2-TZVP}) = -1251.733793803222397$   
 $= (-1251.540954293549021)$   
 $- (-625.769983634622236) + (-625.962823144295612)$

$V_{22}(\text{Def2-TZVP}) = -1251.733818964411512$   
 $= (-1251.540954293549021)$   
 $- (-625.769927880964019) + (-625.962792551826510)$

$E(\text{Def2-TZVP}) = -1251.736821005446927$

5 2

|    |                 |                 |                 |
|----|-----------------|-----------------|-----------------|
| Ru | -4.529621865167 | -0.082186080665 | 0.018152907471  |
| N  | -4.075938379049 | -1.486295993263 | -1.546335851749 |
| H  | -4.374358860951 | -2.441848327617 | -1.324865468749 |
| H  | -3.071663290989 | -1.563189180801 | -1.735980515575 |
| H  | -4.518920011245 | -1.272525690409 | -2.445260883703 |
| N  | -6.507294938828 | -0.910569072526 | 0.149089136160  |
| H  | -6.891633488787 | -0.901036155467 | 1.099236829786  |
| H  | -6.552130530797 | -1.888335128800 | -0.155858093051 |
| H  | -7.188246302703 | -0.418531436468 | -0.438122320336 |
| N  | -3.859898435842 | -1.530646447980 | 1.459680388015  |
| H  | -2.837709005618 | -1.591585580812 | 1.510920714412  |
| H  | -4.172410602467 | -2.483743453253 | 1.247747718098  |
| H  | -4.181036792676 | -1.353560741530 | 2.416974689340  |
| N  | -5.040456710050 | 1.298664766704  | 1.582526009360  |
| H  | -4.492625795269 | 2.165068557169  | 1.541512925985  |
| H  | -4.918977981128 | 0.933763938611  | 2.532542117172  |

|    |                 |                 |                 |
|----|-----------------|-----------------|-----------------|
| H  | -6.020320280980 | 1.596850619943  | 1.535405455310  |
| N  | -5.235367133353 | 1.364697240626  | -1.408425181757 |
| H  | -5.405771043880 | 0.991458137153  | -2.347800344630 |
| H  | -4.576258715092 | 2.140943693807  | -1.530268126045 |
| H  | -6.116696988034 | 1.808885891682  | -1.129988794199 |
| C  | -0.010031135920 | 1.822808481656  | -0.277058430736 |
| C  | -0.589412815088 | 1.552070481585  | 0.960137034103  |
| C  | -1.866994158397 | 1.010631021953  | 1.000594208723  |
| N  | -2.577695971943 | 0.731161666360  | -0.109257713888 |
| C  | -2.009802394629 | 0.992516555396  | -1.303164601758 |
| C  | -0.737165815177 | 1.532110260322  | -1.429099270553 |
| H  | 0.992623177689  | 2.252732089964  | -0.341908227615 |
| H  | -0.064034840136 | 1.757134755304  | 1.894617137836  |
| H  | -2.339341871760 | 0.797617648578  | 1.961386940895  |
| H  | -2.597352992230 | 0.764876304071  | -2.195480043215 |
| H  | -0.331196485291 | 1.720436849219  | -2.424492002443 |
| Ru | 4.983064845083  | 0.094461950995  | 0.032318241982  |
| N  | 6.985744089260  | 0.867560167861  | 0.189541122328  |
| H  | 7.676609643249  | 0.310549416370  | -0.323690921619 |
| H  | 7.324709857561  | 0.908300570111  | 1.156105492518  |
| H  | 7.083480436554  | 1.818765916633  | -0.180721234641 |
| N  | 5.602192746004  | -1.219943869826 | -1.555139401075 |
| H  | 6.555974015971  | -1.575492687803 | -1.434434488334 |
| H  | 5.595673861546  | -0.786394135965 | -2.483784317435 |
| H  | 5.013746321869  | -2.056622612268 | -1.627559931296 |
| N  | 5.493498435518  | -1.442284930091 | 1.447274473957  |
| H  | 6.397025018420  | -1.880452291019 | 1.240182279533  |
| H  | 4.815885335700  | -2.212051775809 | 1.449170606610  |
| H  | 5.567503706678  | -1.125969665376 | 2.419518362451  |
| N  | 4.395215784736  | 1.430648896655  | 1.609454621352  |
| H  | 4.910441460773  | 2.316537665058  | 1.587360814073  |
| H  | 4.535654798618  | 1.063782666471  | 2.555805606471  |
| H  | 3.405068381036  | 1.692274036841  | 1.554402103279  |
| N  | 4.523021703473  | 1.639716004159  | -1.392781241506 |
| H  | 5.175360114610  | 1.671480274292  | -2.183024645951 |
| H  | 4.539241710826  | 2.580063864068  | -0.985227373136 |

|   |                 |                 |                 |
|---|-----------------|-----------------|-----------------|
| H | 3.589998633673  | 1.546491148730  | -1.806413378700 |
| C | 0.468181750205  | -1.814900446338 | -0.272785100352 |
| C | 1.180382470533  | -1.487942874832 | -1.424147690680 |
| C | 2.442762448293  | -0.925212537108 | -1.295992775691 |
| N | 3.016149467579  | -0.678546047830 | -0.102423363300 |
| C | 2.313910649703  | -0.980131248966 | 1.006778484993  |
| C | 1.046631161978  | -1.545736232276 | 0.965275378115  |
| H | -0.521786258106 | -2.272048188522 | -0.339890558605 |
| H | 0.772252756472  | -1.667360709528 | -2.420355454475 |
| H | 3.019765197145  | -0.670165854202 | -2.187320732558 |
| H | 2.786215583264  | -0.765169092045 | 1.967303686074  |
| H | 0.529437583216  | -1.771703156124 | 1.899580645990  |

[Co(en)<sub>3</sub>]<sup>3+/2+</sup>

$$V_{11}(\text{Def2-SV(P)}) = -3906.715092120288318$$

$$= (-3906.529144613510198) - (-1953.266233251064023) + (-1953.452180757841916)$$

$$V_{22}(\text{Def2-SV(P)}) = -3906.715092162918154$$

$$= (-3906.529144613510198) - (-1953.266041034662067) + (-1953.451988584070023)$$

$$G(\text{Def2-SV(P)}) = -3906.061603979986$$

$$E(\text{Def2-SV(P)}) = -3906.717058701236056$$

$$V_{11}(\text{Def2-TZVP}) = -3908.475145303697900$$

$$= (-3908.290664840852969) - (-1954.147349150026002) + (-1954.331829612871161)$$

$$V_{22}(\text{Def2-TZVP}) = -3908.475121185414991$$

$$= (-3908.290664840852969) - (-1954.147191439431936) + (-1954.331647783993958)$$

$$E(\text{Def2-TZVP}) = -3908.477128031932352$$

5 4

|    |                 |                 |                 |
|----|-----------------|-----------------|-----------------|
| Co | -3.873543706532 | 0.067386073654  | -0.012046321930 |
| N  | -1.815942542221 | 0.375343798730  | 0.283571598888  |
| N  | -4.024662139709 | 1.622943616836  | 1.376550052233  |
| N  | -3.899522238562 | 1.356531157370  | -1.656657569564 |
| N  | -3.519668572973 | -1.376416163031 | -1.480743923474 |
| N  | -4.002455393529 | -1.372516227172 | 1.494197378930  |
| N  | -5.943770429608 | -0.198147450713 | -0.084912197046 |
| C  | -1.626480939843 | 1.668452292885  | 0.972307462286  |
| C  | -2.709691771204 | 1.818584476245  | 2.022026087209  |
| C  | -4.033263425570 | 0.540721605998  | -2.882251530525 |

|    |                 |                 |                 |
|----|-----------------|-----------------|-----------------|
| C  | -3.159907461333 | -0.689105791379 | -2.739355454426 |
| C  | -5.337783422156 | -2.003213413314 | 1.423203566467  |
| C  | -6.364084300579 | -0.927643760428 | 1.130301825587  |
| H  | -4.654900731273 | 2.046453597226  | -1.617528890386 |
| H  | -3.040625464080 | 1.911123896844  | -1.709482850235 |
| H  | -4.342369002326 | -1.965178212217 | -1.636600843073 |
| H  | -2.777424849282 | -2.030955939808 | -1.218151468475 |
| H  | -4.295686934295 | 2.479977341827  | 0.885314589295  |
| H  | -4.747681090530 | 1.495407239134  | 2.089550837268  |
| H  | -1.247390297854 | 0.347679066955  | -0.566553604706 |
| H  | -1.443755813108 | -0.378421835366 | 0.869642113285  |
| H  | -3.867563720675 | -0.954310199332 | 2.418980730848  |
| H  | -3.278694676456 | -2.092836458217 | 1.425323531054  |
| H  | -6.229009924320 | -0.726025839619 | -0.914449092235 |
| H  | -6.452941596491 | 0.687460845238  | -0.154479465596 |
| H  | -7.367592135176 | -1.364795229932 | 1.008933884987  |
| H  | -6.416910837459 | -0.209962049790 | 1.963932042108  |
| H  | -5.581094831256 | -2.534094921042 | 2.356976046430  |
| H  | -5.321021239365 | -2.748846505471 | 0.612956286820  |
| H  | -1.702608389406 | 2.473945879129  | 0.225108327737  |
| H  | -0.626382776695 | 1.739859416568  | 1.428784976611  |
| H  | -2.591830471703 | 1.051118939373  | 2.803378384095  |
| H  | -2.645372040667 | 2.802073693702  | 2.513437795576  |
| H  | -2.098045630485 | -0.401466166686 | -2.685747366897 |
| H  | -3.275928441773 | -1.355787885888 | -3.608191876480 |
| H  | -5.089987228609 | 0.249675968703  | -2.988557789661 |
| H  | -3.756889523945 | 1.116066520423  | -3.779805876797 |
| Co | 4.085658187158  | -0.073340858675 | 0.011561261164  |
| N  | 5.526906633170  | -1.316017522968 | 0.873089367405  |
| N  | 5.687789123363  | 0.491108564795  | -1.207150174468 |
| N  | 3.448341812098  | -1.595366579043 | -1.271947991692 |
| N  | 2.572281821323  | -0.839642730001 | 1.240945325450  |
| N  | 4.452483918387  | 1.505093644501  | 1.328735251513  |
| N  | 2.785529746393  | 1.310355930517  | -0.868941562449 |
| C  | 6.708042181487  | -1.365205307125 | -0.014269351597 |
| C  | 6.943455420096  | 0.017563702030  | -0.588343406482 |

|   |                |                 |                 |
|---|----------------|-----------------|-----------------|
| C | 2.121980377427 | -2.059425437786 | -0.813309390375 |
| C | 2.138918468185 | -2.145299164216 | 0.699863846416  |
| C | 3.370442175442 | 2.500372181927  | 1.173844597510  |
| C | 3.057548559302 | 2.648880389847  | -0.302141516072 |
| H | 3.391352386038 | -1.296804671323 | -2.249163454944 |
| H | 4.103689746826 | -2.382407657613 | -1.275401007013 |
| H | 1.766929434494 | -0.210228367359 | 1.294918530846  |
| H | 2.882232045229 | -0.947267924653 | 2.210442610711  |
| H | 5.577025263878 | 0.057495037862  | -2.128566705326 |
| H | 5.750880971279 | 1.494470490830  | -1.397068331603 |
| H | 5.203921870915 | -2.265365494141 | 1.076463454012  |
| H | 5.798388527272 | -0.932558779449 | 1.783321672897  |
| H | 5.354623953734 | 1.948878634996  | 1.135216338375  |
| H | 4.510657070730 | 1.206161485792  | 2.306021758420  |
| H | 1.806090757973 | 1.061465294831  | -0.706944766584 |
| H | 2.880193620607 | 1.337206628047  | -1.887907810915 |
| H | 2.205876798770 | 3.330263173987  | -0.454267827565 |
| H | 3.920420043916 | 3.080021096953  | -0.833363985433 |
| H | 3.653478106695 | 3.471027257051  | 1.610867597505  |
| H | 2.487748988318 | 2.138752356373  | 1.724100843493  |
| H | 6.502897779107 | -2.082859523263 | -0.824091736255 |
| H | 7.599888703083 | -1.722295561098 | 0.524400242784  |
| H | 7.223425560145 | 0.723026729546  | 0.209851301671  |
| H | 7.769295879610 | 0.001546504818  | -1.317039377571 |
| H | 2.856024926370 | -2.912802730120 | 1.030992497393  |
| H | 1.148112650848 | -2.431414607710 | 1.086636260055  |
| H | 1.366365856068 | -1.331947460214 | -1.149913351046 |
| H | 1.860706226403 | -3.033083034784 | -1.256957915050 |

[Ru(en)<sub>3</sub>]<sup>3+/2+</sup>

$$V_{11}(\text{Def2-SV(P)}) = -1331.298470528166945$$

$$= (-1331.106771267352997) - (-665.554851176932061) + (-665.746550437746123)$$

$$V_{22}(\text{Def2-SV(P)}) = -1331.298470594789706$$

$$= (-1331.106771267352997) - (-665.554921966882603) + (-665.746621294319311)$$

$$G(\text{Def2-SV(P)}) = -1330.644518708757$$

$$E(\text{Def2-SV(P)}) = -1331.300539360303901$$

$$V_{11}(\text{Def2-TZVP}) = -1332.741915561368842$$

$$= (-1332.553952541867829) - (-666.278843392006479) + (-666.466806411507605)$$

$$V_{22}(\text{Def2-TZVP}) = -1332.741942650165583$$

$$= (-1332.553952541867829) - (-666.27888471583969) + (-666.466878579881723)$$

$$E(\text{Def2-TZVP}) = -1332.743972044019984$$

5 2

|    |                 |                 |                 |
|----|-----------------|-----------------|-----------------|
| Ru | -3.907936323779 | 0.039055352007  | -0.026228322528 |
| N  | -1.834824123971 | 0.526086977522  | 0.313186582908  |
| N  | -4.157512586235 | 1.551327422462  | 1.481114143504  |
| N  | -3.939935821254 | 1.412877167035  | -1.679827294677 |
| N  | -3.486293322882 | -1.336956303141 | -1.618742434390 |
| N  | -3.993917880556 | -1.468243474147 | 1.502855947583  |
| N  | -5.994963549957 | -0.444737880593 | -0.145399655442 |
| C  | -1.756553191819 | 1.792080544133  | 1.081350029710  |
| C  | -2.849212061637 | 1.808437604999  | 2.131758995716  |
| C  | -4.022116187510 | 0.639583606655  | -2.943286025797 |
| C  | -3.119002009643 | -0.572224592140 | -2.836054960039 |
| C  | -5.271067057513 | -2.211997105312 | 1.373180224140  |
| C  | -6.381134372770 | -1.232068813989 | 1.051615360316  |
| H  | -4.724982730052 | 2.069128062299  | -1.635163307051 |
| H  | -3.108474145946 | 2.010506140696  | -1.702749985991 |
| H  | -4.281519224724 | -1.946384691472 | -1.830392049664 |
| H  | -2.726455045269 | -1.980161334515 | -1.379207493360 |
| H  | -4.496038450222 | 2.413210892505  | 1.042087802750  |
| H  | -4.856964947117 | 1.341000474629  | 2.197790283891  |
| H  | -1.262776200343 | 0.609383599340  | -0.530835370788 |
| H  | -1.387616981710 | -0.224608274336 | 0.848235019009  |
| H  | -3.928918452907 | -1.066921818971 | 2.442949594256  |
| H  | -3.213515490517 | -2.129706073822 | 1.452688783919  |
| H  | -6.221478496333 | -0.982089450224 | -0.987529641130 |
| H  | -6.585414653722 | 0.389817876695  | -0.207825428429 |
| H  | -7.332778416050 | -1.761159261817 | 0.886292778108  |
| H  | -6.531807608322 | -0.531269165732 | 1.887165724278  |
| H  | -5.498235961875 | -2.771728685538 | 2.294063077718  |
| H  | -5.156609756066 | -2.942231403393 | 0.557114072682  |
| H  | -1.892056559074 | 2.627007144254  | 0.376205984081  |



|    |                 |                 |                 |
|----|-----------------|-----------------|-----------------|
| H  | -0.766303933162 | 1.910742701162  | 1.549081775527  |
| H  | -2.676522452962 | 1.014604661370  | 2.875714180932  |
| H  | -2.855714262349 | 2.770210631431  | 2.668292245549  |
| H  | -2.067085669128 | -0.260921549434 | -2.740186120582 |
| H  | -3.198576298551 | -1.200479068859 | -3.736881788958 |
| H  | -5.068474844685 | 0.326146507120  | -3.082821116623 |
| H  | -3.740973090552 | 1.261850163049  | -3.807386069388 |
| Ru | 4.108092123772  | -0.037627939853 | 0.024450504861  |
| N  | 5.565649046269  | -1.400975105064 | 0.835847481459  |
| N  | 5.722737199320  | 0.320487581292  | -1.352384895270 |
| N  | 3.241856467902  | -1.647004841096 | -1.106099127643 |
| N  | 2.543291094279  | -0.606939557952 | 1.384779795255  |
| N  | 4.740215072040  | 1.637108863626  | 1.210362214505  |
| N  | 2.824100156973  | 1.468869446792  | -0.810528543095 |
| C  | 6.664326474292  | -1.579406020716 | -0.144316670678 |
| C  | 6.974153864867  | -0.246318139254 | -0.793339953377 |
| C  | 1.916632012033  | -1.985687220134 | -0.529823181662 |
| C  | 2.003500773342  | -1.929098486203 | 0.981924177619  |
| C  | 3.734177961240  | 2.719115569794  | 1.079266635206  |
| C  | 3.295013490349  | 2.805165412777  | -0.368280523036 |
| H  | 3.125686257848  | -1.420706273292 | -2.098248164832 |
| H  | 3.836333558769  | -2.480896088036 | -1.104059271740 |
| H  | 1.779137556204  | 0.074812362448  | 1.409579176613  |
| H  | 2.871164112942  | -0.657730752132 | 2.353856892991  |
| H  | 5.519271911050  | -0.137402330878 | -2.246330202709 |
| H  | 5.876498936405  | 1.301334244905  | -1.600454639093 |
| H  | 5.201589759735  | -2.318789078865 | 1.105640512802  |
| H  | 5.947226247674  | -1.013057474554 | 1.704375907343  |
| H  | 5.658293423747  | 1.994816546206  | 0.931254000794  |
| H  | 4.849521040931  | 1.396091343445  | 2.199799632993  |
| H  | 1.844773768393  | 1.348607375306  | -0.536025241282 |
| H  | 2.806329434645  | 1.440881029772  | -1.834008963579 |
| H  | 2.506580857216  | 3.563516647099  | -0.493880662292 |
| H  | 4.142236380792  | 3.095452974811  | -1.008889587893 |
| H  | 4.143372058861  | 3.682546354737  | 1.421540892825  |
| H  | 2.880362021943  | 2.468892053473  | 1.728063397205  |

|   |                |                 |                 |
|---|----------------|-----------------|-----------------|
| H | 6.330401257932 | -2.303444026014 | -0.903741392711 |
| H | 7.562932616864 | -1.994805134555 | 0.338156636019  |
| H | 7.369546053895 | 0.462050360884  | -0.048610452632 |
| H | 7.739202562799 | -0.365403788141 | -1.576749941741 |
| H | 2.685716332287 | -2.705934270400 | 1.360457634793  |
| H | 1.015815811745 | -2.106881796831 | 1.435417771077  |
| H | 1.186550761418 | -1.248757624032 | -0.898903018351 |
| H | 1.584873286007 | -2.981228067724 | -0.864432453637 |

[Fe(bpy)<sub>3</sub>]<sup>3+/2+</sup>

$$V_{11}(\text{Def2-SV(P)}) = -5495.854390301957210$$

$$= (-5495.652192927709621) - (-2747.820811284861065) + (-2748.023008659108655)$$

$$V_{22}(\text{Def2-SV(P)}) = -5495.854390298880389$$

$$= (-5495.652192927709621) - (-2747.820811256640809) + (-2748.023008627812033)$$

$$G(\text{Def2-SV(P)}) = -5494.953500696567$$

$$E(\text{Def2-SV(P)}) = -5495.857549938864395$$

$$V_{11}(\text{Def2-TZVP}) = -5499.412442484848725$$

$$= (-5499.212315342012516) - (-2749.601942292520107) + (-2749.802069435355861)$$

$$V_{22}(\text{Def2-TZVP}) = -5499.412444308662089$$

$$= (-5499.212315342012516) - (-2749.601929150865999) + (-2749.802058117515116)$$

$$E(\text{Def2-TZVP}) = -5499.415565427758338$$

5 2

|    |                 |                 |                 |
|----|-----------------|-----------------|-----------------|
| Fe | -4.267531369281 | 0.669611604322  | 0.073403486406  |
| C  | -6.990848122693 | -2.959653835572 | 1.484932488315  |
| C  | -2.619113216235 | 1.054461437878  | 2.526226479711  |
| C  | -2.154581613567 | 0.729788437671  | 3.794374586493  |
| C  | -2.710735047094 | -0.366314181560 | 4.447639731847  |
| C  | -3.720021276377 | -1.089175517559 | 3.818237148706  |
| C  | -4.143797174410 | -0.698425094560 | 2.550633395541  |
| C  | -5.226241621005 | -1.362930041961 | 1.795730116796  |
| C  | -5.984887378426 | -2.422492955666 | 2.284262173311  |
| C  | -7.212482280777 | -2.421477565449 | 0.221434228948  |
| C  | -6.415537877960 | -1.364887611355 | -0.201542386928 |
| H  | -2.206666139838 | 1.906366549891  | 1.983043404757  |
| H  | -1.367950551742 | 1.331765358896  | 4.252239982998  |
| H  | -4.169625304038 | -1.947873166517 | 4.316604281322  |

|   |                 |                 |                 |
|---|-----------------|-----------------|-----------------|
| H | -5.802154941875 | -2.827723167916 | 3.279374715137  |
| H | -7.990636814798 | -2.808008506779 | -0.438461664429 |
| H | -6.553815761628 | -0.921248307960 | -1.188702867310 |
| N | -3.586262344367 | 0.356807451824  | 1.919688890371  |
| N | -5.445799833893 | -0.853462362604 | 0.564064866719  |
| C | -4.584277628985 | 0.484801914894  | -2.886525186991 |
| C | -5.146958087713 | 0.807349289057  | -4.114891528428 |
| C | -6.231393676149 | 1.678147018377  | -4.143486934864 |
| C | -6.717606603562 | 2.193185232613  | -2.944964169000 |
| C | -6.105068125839 | 1.823570349626  | -1.750886327045 |
| C | -6.534434037497 | 2.295655180373  | -0.418892060271 |
| C | -7.646532734079 | 3.102911894069  | -0.197236730494 |
| C | -7.960915670618 | 3.479920544056  | 1.105545712569  |
| C | -7.156601814135 | 3.037465948874  | 2.150884077215  |
| C | -6.063422544467 | 2.233005343647  | 1.855381663236  |
| C | -2.749427912423 | -1.805221934240 | -0.633043633663 |
| C | -1.669691488748 | -2.521482082187 | -1.135594914722 |
| C | -0.561951629707 | -1.819890894479 | -1.600147592142 |
| C | -0.564628404844 | -0.430098682608 | -1.526895951864 |
| C | -1.677724563121 | 0.221379603464  | -1.002906023356 |
| C | -1.792153927513 | 1.688052754162  | -0.872896997540 |
| C | -0.789037822630 | 2.582842490828  | -1.234287168163 |
| C | -1.003747810689 | 3.947336163217  | -1.058279536987 |
| C | -2.217958453104 | 4.378873937622  | -0.534092311355 |
| C | -3.174981972737 | 3.428417072059  | -0.199154173044 |
| H | -3.737436637969 | -0.200245302163 | -2.827730637283 |
| H | -4.732808854138 | 0.376172536483  | -5.027566895837 |
| H | -7.564727756713 | 2.878871259019  | -2.948582984921 |
| H | -8.270377200580 | 3.434066225040  | -1.027310777185 |
| H | -7.364434731624 | 3.305801411367  | 3.187792951225  |
| H | -5.408376951984 | 1.871272582145  | 2.649172641351  |
| H | -3.642536455902 | -2.322403066055 | -0.279647498242 |
| H | -1.711712543258 | -3.611263177350 | -1.164178251966 |
| H | 0.292968728524  | 0.138673740881  | -1.883944658144 |
| H | 0.155256062140  | 2.227555747741  | -1.647864333146 |
| H | -2.432400138504 | 5.437467300959  | -0.380187236890 |

|    |                 |                 |                 |
|----|-----------------|-----------------|-----------------|
| H  | -4.136248466787 | 3.728557412730  | 0.221284802155  |
| N  | -5.051088096896 | 0.979135903359  | -1.734479871076 |
| N  | -5.758056272057 | 1.875246497499  | 0.603137704690  |
| N  | -2.757227430729 | -0.468349250761 | -0.577092874281 |
| N  | -2.964592848712 | 2.117438033176  | -0.358174542542 |
| H  | -7.596670320908 | -3.790923277734 | 1.851929041302  |
| H  | -2.367105852509 | -0.657940927376 | 5.442471911024  |
| H  | -0.225334376616 | 4.663382655027  | -1.330660171475 |
| H  | 0.301477140497  | -2.347325459996 | -2.012368811694 |
| H  | -6.699697724875 | 1.957548762396  | -5.089769904185 |
| H  | -8.830339882206 | 4.112289249582  | 1.297957422636  |
| Fe | 4.698335057406  | -0.737404274381 | -0.081192657219 |
| C  | 9.036217503065  | 0.782409450937  | -1.293594958253 |
| C  | 5.007346170100  | -0.845772382024 | 2.881311370292  |
| C  | 5.666532602003  | -0.639123541143 | 4.086505836139  |
| C  | 6.961909493991  | -0.132638905801 | 4.059614171000  |
| C  | 7.554249593662  | 0.146472467259  | 2.831023239337  |
| C  | 6.834073657653  | -0.087824941748 | 1.663077834150  |
| C  | 7.356974952259  | 0.157716427205  | 0.303736357024  |
| C  | 8.651929043113  | 0.589178921854  | 0.030490126016  |
| C  | 8.116484457067  | 0.536618591626  | -2.308125778580 |
| C  | 6.842190049619  | 0.105696722082  | -1.961499753525 |
| H  | 3.994007789760  | -1.249470635926 | 2.864906956032  |
| H  | 5.162495505078  | -0.876247006529 | 5.024631689201  |
| H  | 8.567938561808  | 0.544860882394  | 2.790880626680  |
| H  | 9.360930787765  | 0.772294192031  | 0.837800249307  |
| H  | 8.372543990443  | 0.673769943476  | -3.359803656331 |
| H  | 6.093124038536  | -0.091948555120 | -2.729470779950 |
| N  | 5.575989122500  | -0.577488280334 | 1.700783293200  |
| N  | 6.471102432235  | -0.073966498233 | -0.688926244427 |
| C  | 3.200223248185  | -0.010666472271 | -2.551192466888 |
| C  | 2.636771852228  | -0.249717317241 | -3.797867324470 |
| C  | 2.824256889179  | -1.497187467600 | -4.386121107887 |
| C  | 3.579775651457  | -2.455181104002 | -3.716223405595 |
| C  | 4.123887199842  | -2.141079035236 | -2.473119862991 |
| C  | 4.968507694160  | -3.058231669643 | -1.679654886120 |

|   |                 |                 |                 |
|---|-----------------|-----------------|-----------------|
| C | 5.367483064483  | -4.320464308686 | -2.108908310677 |
| C | 6.173969456609  | -5.094413727842 | -1.278545737991 |
| C | 6.560086155172  | -4.584857207227 | -0.043075762119 |
| C | 6.125134467041  | -3.315958019505 | 0.319913908156  |
| C | 4.508289990857  | 2.235680316661  | 0.032433851926  |
| C | 3.899870728786  | 3.450854705509  | 0.323097573724  |
| C | 2.628142337134  | 3.442698099634  | 0.886703024716  |
| C | 2.009872136500  | 2.221872125900  | 1.143969519541  |
| C | 2.678868750551  | 1.043873816183  | 0.823760501125  |
| C | 2.122542948999  | -0.306952902974 | 1.039158431200  |
| C | 0.877310413846  | -0.555873882598 | 1.610011001031  |
| C | 0.446656988491  | -1.871225375194 | 1.755394693103  |
| C | 1.269734485219  | -2.902312127749 | 1.314426454845  |
| C | 2.504924218164  | -2.580582459458 | 0.764439877261  |
| H | 3.076687282333  | 0.956225965208  | -2.060626566918 |
| H | 2.060319788352  | 0.535539418568  | -4.289669549930 |
| H | 3.739112473138  | -3.435874216865 | -4.164152203421 |
| H | 5.059389285022  | -4.702334031624 | -3.082157500844 |
| H | 7.191406515356  | -5.154905905798 | 0.640228786213  |
| H | 6.403359246650  | -2.884719368513 | 1.282984824988  |
| H | 5.502203372688  | 2.203766577582  | -0.416989874451 |
| H | 4.424473889992  | 4.382342119393  | 0.105336733720  |
| H | 1.014737538647  | 2.196458147334  | 1.589032469787  |
| H | 0.247520232992  | 0.266571001649  | 1.946710766532  |
| H | 0.972303752019  | -3.948691251056 | 1.397501072459  |
| H | 3.183450226357  | -3.365651363576 | 0.427745205315  |
| N | 3.921384086543  | -0.933644930187 | -1.904695239263 |
| N | 5.347567831780  | -2.574633923093 | -0.476653164061 |
| N | 3.910443306502  | 1.063184400669  | 0.269708095428  |
| N | 2.924947729904  | -1.316539873809 | 0.639287987994  |
| H | 10.048022213421 | 1.121471472705  | -1.526273675480 |
| H | 7.512106803541  | 0.045333928462  | 4.986088612602  |
| H | -0.526911888446 | -2.084570700061 | 2.203051839964  |
| H | 2.115764248192  | 4.377004084549  | 1.126321211041  |
| H | 2.389590950239  | -1.725289083195 | -5.361663558322 |
| H | 6.496644536814  | -6.087252321449 | -1.599659283066 |

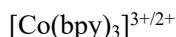

$V_{11}(\text{Def2-SV(P)}) = -5733.941931071816725$

$= (-5733.764781818348638) - (-2866.876474973177210) + (-2867.053624226644843)$

$V_{22}(\text{Def2-SV(P)}) = -5733.941931099316207$

$= (-5733.764781818348638) - (-2866.876344784775938) + (-2867.053494065743962)$

$G(\text{Def2-SV(P)}) = -5733.043265172826$

$E(\text{Def2-SV(P)}) = -5733.945641776352204$

$V_{11}(\text{Def2-TZVP}) = -5737.532969739830151$

$= (-5737.357104597199395) - (-2868.673892021231950) + (-2868.849757163863160)$

$V_{22}(\text{Def2-TZVP}) = -5737.532969522004350$

$= (-5737.357104597199395) - (-2868.673790825252127) + (-2868.849655750057082)$

$E(\text{Def2-TZVP}) = -5737.536652273976870$

5 2

|    |                 |                 |                 |
|----|-----------------|-----------------|-----------------|
| Co | -4.224691311278 | 0.561805332032  | 0.091775640689  |
| C  | -6.853847433313 | -3.076680484716 | 1.569082589938  |
| C  | -2.649243022282 | 1.105533957723  | 2.631136380721  |
| C  | -2.192498512033 | 0.812358795514  | 3.911089851965  |
| C  | -2.708067957756 | -0.306726421985 | 4.559403625783  |
| C  | -3.672276445279 | -1.080634568994 | 3.918404866596  |
| C  | -4.088385434542 | -0.715506523061 | 2.639899154878  |
| C  | -5.136138432224 | -1.425475712353 | 1.871711840157  |
| C  | -5.876798988377 | -2.492515582269 | 2.371433185652  |
| C  | -7.067527973464 | -2.576858748507 | 0.288952716312  |
| C  | -6.290575286697 | -1.510688251303 | -0.146684265535 |
| H  | -2.275112083949 | 1.974998200611  | 2.086057331340  |
| H  | -1.445579908642 | 1.453771030424  | 4.382032394791  |
| H  | -4.089860254949 | -1.955642079910 | 4.416525496639  |
| H  | -5.703042349442 | -2.866308033088 | 3.380338098959  |
| H  | -7.823419641864 | -2.999759668956 | -0.374393026116 |
| H  | -6.420472899565 | -1.093667749829 | -1.146186192980 |
| N  | -3.565213523820 | 0.355625404360  | 2.015448483418  |
| N  | -5.349280864555 | -0.955937591971 | 0.623010606431  |
| C  | -4.520335769235 | 0.278190504416  | -2.933554713073 |
| C  | -5.031801286227 | 0.615997345287  | -4.181291937509 |
| C  | -6.083119402494 | 1.524903791235  | -4.243173585654 |

|   |                 |                 |                 |
|---|-----------------|-----------------|-----------------|
| C | -6.590949930964 | 2.057436116999  | -3.060742562678 |
| C | -6.028271684646 | 1.666782887767  | -1.847966903655 |
| C | -6.493351046765 | 2.152749035042  | -0.528542204339 |
| C | -7.620246321543 | 2.951814044115  | -0.353867159996 |
| C | -7.981083776998 | 3.346987358463  | 0.931341645217  |
| C | -7.207476858187 | 2.930627268973  | 2.009679987510  |
| C | -6.096894898871 | 2.134005403332  | 1.761534771876  |
| C | -2.690318821158 | -1.910260569373 | -0.562757053508 |
| C | -1.619132983870 | -2.615659764644 | -1.098319748040 |
| C | -0.544189885444 | -1.902133254411 | -1.618250896862 |
| C | -0.567272780217 | -0.511697749676 | -1.562418441507 |
| C | -1.668095516102 | 0.128568270693  | -1.000255488197 |
| C | -1.805366956375 | 1.594466852341  | -0.885803180237 |
| C | -0.828257689688 | 2.502816634652  | -1.280184082070 |
| C | -1.059729630378 | 3.865296025903  | -1.109486976265 |
| C | -2.264286810221 | 4.281337689660  | -0.553105444161 |
| C | -3.198112820729 | 3.318783061721  | -0.188120422626 |
| H | -3.699100707345 | -0.435568923510 | -2.844038648934 |
| H | -4.605638308708 | 0.169442851352  | -5.081068622108 |
| H | -7.412255536487 | 2.773272971472  | -3.093834665001 |
| H | -8.222621651650 | 3.259986817586  | -1.208241086004 |
| H | -7.451702545131 | 3.212825125589  | 3.034896310012  |
| H | -5.462637391214 | 1.791218964911  | 2.580207373964  |
| H | -3.559112574796 | -2.437990262118 | -0.167715836905 |
| H | -1.644050504701 | -3.706220053756 | -1.111397166288 |
| H | 0.261533943326  | 0.064501255125  | -1.970341105252 |
| H | 0.108801561293  | 2.160428811337  | -1.717741586685 |
| H | -2.491003375642 | 5.337219000558  | -0.398565017583 |
| H | -4.151879696977 | 3.607521837146  | 0.255492303671  |
| N | -5.005670725696 | 0.792303887498  | -1.801618126856 |
| N | -5.748567608811 | 1.760566747655  | 0.526243786961  |
| N | -2.716609501030 | -0.573812883009 | -0.523751909321 |
| N | -2.972402865699 | 2.011133000068  | -0.348873343444 |
| H | -7.444133539137 | -3.913974818626 | 1.947508429482  |
| H | -2.369156019044 | -0.576132387885 | 5.562166717166  |
| H | -0.301038835937 | 4.591151418170  | -1.410021212387 |

|    |                 |                 |                 |
|----|-----------------|-----------------|-----------------|
| H  | 0.307262424210  | -2.420768357029 | -2.064690407810 |
| H  | -6.509919616449 | 1.821119309398  | -5.203956218620 |
| H  | -8.863311525589 | 3.972401540860  | 1.084337166806  |
| Co | 4.442768231801  | -0.612619724468 | -0.094050266502 |
| C  | 8.795729229142  | 0.934663068629  | -1.197095822735 |
| C  | 4.767003825121  | -0.812707390591 | 2.932631296604  |
| C  | 5.408042111268  | -0.581143865498 | 4.144294591970  |
| C  | 6.680052869846  | -0.018288413409 | 4.124839917513  |
| C  | 7.269002248346  | 0.286397134607  | 2.900100419832  |
| C  | 6.564999276398  | 0.022063390063  | 1.727758539819  |
| C  | 7.093505996495  | 0.288013940673  | 0.370189799064  |
| C  | 8.391988444199  | 0.723479211282  | 0.118422568632  |
| C  | 7.891495314635  | 0.701962155249  | -2.227918055047 |
| C  | 6.612369361458  | 0.268227637051  | -1.903634597144 |
| H  | 3.770681530828  | -1.258674029679 | 2.906663118530  |
| H  | 4.909414716763  | -0.840796678163 | 5.079470524270  |
| H  | 8.264265369021  | 0.729536215490  | 2.869071839159  |
| H  | 9.091652463579  | 0.892063677190  | 0.936849558138  |
| H  | 8.161911432897  | 0.850632104068  | -3.274395123178 |
| H  | 5.873930400653  | 0.080860047685  | -2.683975374166 |
| N  | 5.331639968274  | -0.517128854195 | 1.760098777918  |
| N  | 6.224005321688  | 0.073196517372  | -0.639502231117 |
| C  | 3.008905313493  | 0.225262670955  | -2.640570682998 |
| C  | 2.443140355414  | 0.008009108748  | -3.891651526205 |
| C  | 2.583040374210  | -1.248981182446 | -4.473638751510 |
| C  | 3.297922762491  | -2.235006469009 | -3.798376741616 |
| C  | 3.846251528907  | -1.936777097309 | -2.552592870150 |
| C  | 4.668279775327  | -2.878436079120 | -1.759496472513 |
| C  | 5.037794930657  | -4.146041666460 | -2.199235266559 |
| C  | 5.833077615083  | -4.944353710231 | -1.380998416060 |
| C  | 6.241379433106  | -4.453394575174 | -0.145604372796 |
| C  | 5.832075114698  | -3.180436171297 | 0.232120967382  |
| C  | 4.248946032816  | 2.335058078268  | 0.047709757751  |
| C  | 3.639352839524  | 3.540274435476  | 0.375909027517  |
| C  | 2.388197709183  | 3.512260967555  | 0.982075402663  |
| C  | 1.788355777500  | 2.282106068197  | 1.239067327638  |



|   |                 |                 |                 |
|---|-----------------|-----------------|-----------------|
| C | 2.454417885478  | 1.115050047929  | 0.878709502812  |
| C | 1.914201201394  | -0.243408993277 | 1.086200621509  |
| C | 0.700120719005  | -0.515095280831 | 1.711046124342  |
| C | 0.289085454635  | -1.837086742940 | 1.853068115530  |
| C | 1.098554753467  | -2.851679965137 | 1.353548107969  |
| C | 2.302034581408  | -2.507909289712 | 0.749308143996  |
| H | 2.923089116119  | 1.196337113253  | -2.147698824626 |
| H | 1.902810027607  | 0.814202747767  | -4.390741501856 |
| H | 3.422140596294  | -3.221291192501 | -4.245300190874 |
| H | 4.716804348374  | -4.513252536538 | -3.173904558092 |
| H | 6.867121032991  | -5.041078821789 | 0.527633770525  |
| H | 6.120862267913  | -2.762481431586 | 1.197402969960  |
| H | 5.227463308881  | 2.318688985932  | -0.434305642812 |
| H | 4.148577355140  | 4.479224281083  | 0.153993238653  |
| H | 0.809178357134  | 2.240859331729  | 1.715645374538  |
| H | 0.082105897720  | 0.294358936727  | 2.096835213357  |
| H | 0.815638501231  | -3.902391100932 | 1.431964626940  |
| H | 2.966639827259  | -3.281261850900 | 0.363309252555  |
| N | 3.681538706290  | -0.725683800713 | -1.989570322089 |
| N | 5.063634383356  | -2.418694903716 | -0.552304821905 |
| N | 3.669223334836  | 1.155027405362  | 0.289581350118  |
| N | 2.702392563016  | -1.237902577174 | 0.627380525527  |
| H | 9.811366979025  | 1.275208041851  | -1.410136557251 |
| H | 7.215732524162  | 0.184498632734  | 5.054822789688  |
| H | -0.657410423511 | -2.069772251804 | 2.346425749427  |
| H | 1.876599929815  | 4.438014922504  | 1.254148584249  |
| H | 2.144842446089  | -1.463218889300 | -5.450825169067 |
| H | 6.131425855865  | -5.941186506252 | -1.712929587087 |

[Ru(bpy)<sub>3</sub>]<sup>3+/2+</sup>

$$V_{11}(\text{Def2-SV(P)}) = -3158.535220499114985$$

$$= (-3158.325229564693927) - (-1579.156410532812970) + (-1579.366401467234027)$$

$$V_{22}(\text{Def2-SV(P)}) = -3158.535220504411882$$

$$= (-3158.325229564693927) - (-1579.156222449703137) + (-1579.366213389421091)$$

$$G(\text{Def2-SV(P)}) = -3157.635327461220$$

$$E(\text{Def2-SV(P)}) = -3158.538960793356182$$

$$V_{11}(\text{Def2-TZVP}) = -3161.817893313180775$$

$$= (-3161.612361913295899) - (-1580.801322201627954) + (-1581.006853601512830)$$

$$V_{22}(\text{Def2-TZVP}) = -3161.817883725857882$$

$$= (-3161.612361913295899) - (-1580.801152322796952) + (-1581.006674135358935)$$

$$E(\text{Def2-TZVP}) = -3161.821592751013668$$

5 2

|    |                 |                 |                 |
|----|-----------------|-----------------|-----------------|
| Ru | -4.299861001233 | 0.601235307592  | 0.077220758899  |
| C  | -7.064955406088 | -3.123097565505 | 1.494611905591  |
| C  | -2.768639107954 | 0.952410584131  | 2.696245284232  |
| C  | -2.375907793895 | 0.641555555535  | 3.990844190883  |
| C  | -2.967642697405 | -0.449746620936 | 4.622544209657  |
| C  | -3.941904277770 | -1.178624000125 | 3.947677233397  |
| C  | -4.295882268614 | -0.808329103692 | 2.651412361318  |
| C  | -5.336952441617 | -1.492028102409 | 1.853272165836  |
| C  | -6.094249855024 | -2.562896014758 | 2.320627629886  |
| C  | -7.258558521551 | -2.596452225227 | 0.221384493879  |
| C  | -6.468698515887 | -1.528741548133 | -0.184080429010 |
| H  | -2.340561285928 | 1.803180725499  | 2.162328223450  |
| H  | -1.618258535282 | 1.249581448225  | 4.487878393449  |
| H  | -4.419679157615 | -2.028634154219 | 4.434182625452  |
| H  | -5.936453192097 | -2.961016863752 | 3.322775555847  |
| H  | -8.009504674141 | -3.000821496760 | -0.458922624402 |
| H  | -6.580012092350 | -1.087942711870 | -1.176454268196 |
| N  | -3.696132615218 | 0.240174157910  | 2.042050783897  |
| N  | -5.529939527681 | -0.995582038226 | 0.608112421436  |
| C  | -4.584496473792 | 0.463984330372  | -2.968279482247 |
| C  | -5.118363243694 | 0.780520927419  | -4.210044984485 |
| C  | -6.210527045510 | 1.640773118811  | -4.265790590864 |
| C  | -6.733722506965 | 2.149038739814  | -3.080577849765 |
| C  | -6.153047033160 | 1.788117380637  | -1.867126148101 |
| C  | -6.635952315865 | 2.262927197297  | -0.552259846137 |
| C  | -7.755529507758 | 3.074469394374  | -0.385303952530 |
| C  | -8.135165874189 | 3.457841211175  | 0.897646580204  |
| C  | -7.387307176683 | 3.018672808799  | 1.985932699851  |
| C  | -6.283607318251 | 2.210241981553  | 1.751072088578  |
| C  | -2.629716686770 | -1.872347332722 | -0.598194842855 |

|    |                 |                 |                 |
|----|-----------------|-----------------|-----------------|
| C  | -1.550093983198 | -2.572213603162 | -1.119274556253 |
| C  | -0.469116636077 | -1.852839697126 | -1.620383824480 |
| C  | -0.498136134420 | -0.463063647247 | -1.565433955473 |
| C  | -1.609148192468 | 0.178950075513  | -1.022717280155 |
| C  | -1.737402787294 | 1.648441540849  | -0.910940832423 |
| C  | -0.744567652065 | 2.544175043792  | -1.298977562154 |
| C  | -0.955139834340 | 3.910349209662  | -1.134088903048 |
| C  | -2.157834197443 | 4.349318618124  | -0.589943510194 |
| C  | -3.110728418576 | 3.403721619467  | -0.232962840662 |
| H  | -3.731727024539 | -0.211259468555 | -2.880070053048 |
| H  | -4.676492239856 | 0.354234136291  | -5.111873767479 |
| H  | -7.588017013813 | 2.824849644857  | -3.109390108013 |
| H  | -8.337099064511 | 3.405329643039  | -1.245522766716 |
| H  | -7.647895009015 | 3.292496622557  | 3.009381331291  |
| H  | -5.666710656269 | 1.845510856333  | 2.574080511096  |
| H  | -3.505847350654 | -2.396057821529 | -0.212459528329 |
| H  | -1.569341613085 | -3.662813309068 | -1.133096786293 |
| H  | 0.337239527351  | 0.115010065023  | -1.957052433946 |
| H  | 0.191302551497  | 2.188786304534  | -1.728428164311 |
| H  | -2.367594227091 | 5.409567734159  | -0.441310888941 |
| H  | -4.068688703296 | 3.701507274326  | 0.197756234632  |
| N  | -5.086886098196 | 0.954707552899  | -1.827656782338 |
| N  | -5.915855188418 | 1.845590449450  | 0.515515941270  |
| N  | -2.663015572757 | -0.533032247390 | -0.561479459679 |
| N  | -2.904186973340 | 2.089875194483  | -0.385799697676 |
| H  | -7.665924146731 | -3.963434821913 | 1.848582897536  |
| H  | -2.679858601348 | -0.730212005763 | 5.638019458107  |
| H  | -0.181428303292 | 4.622182949760  | -1.429932382257 |
| H  | 0.391642618094  | -2.368957389304 | -2.051036781648 |
| H  | -6.656760967473 | 1.916835967381  | -5.223595934323 |
| H  | -9.011548074508 | 4.093416740662  | 1.041671378967  |
| Ru | 4.521731857431  | -0.621370925645 | -0.065206638085 |
| C  | 9.068712573278  | 0.681472844734  | -1.143486319764 |
| C  | 4.867138237736  | -0.689138720357 | 2.978320880746  |
| C  | 5.529934784136  | -0.518706923504 | 4.186056581341  |
| C  | 6.856150662653  | -0.098481570723 | 4.164577902393  |

|   |                |                 |                 |
|---|----------------|-----------------|-----------------|
| C | 7.473781781614 | 0.133008687636  | 2.939017507884  |
| C | 6.751905857254 | -0.057900656727 | 1.763319043142  |
| C | 7.313075170111 | 0.154375138868  | 0.411486268467  |
| C | 8.635237577825 | 0.519100661501  | 0.169151907595  |
| C | 8.170563875713 | 0.472423668672  | -2.185680340636 |
| C | 6.867132477063 | 0.109254055446  | -1.876402675192 |
| H | 3.828971326115 | -1.023972468190 | 2.951192562073  |
| H | 5.004659722832 | -0.715556113138 | 5.121793455510  |
| H | 8.512408702724 | 0.461300268577  | 2.907288357219  |
| H | 9.330325018123 | 0.674032503412  | 0.994023064621  |
| H | 8.465765838521 | 0.586840826794  | -3.229711875126 |
| H | 6.127568544406 | -0.061192375586 | -2.660661940542 |
| N | 5.460830895751 | -0.464585933296 | 1.798891083683  |
| N | 6.448879105319 | -0.040142043170 | -0.612423285677 |
| C | 3.109886435309 | 0.127709589506  | -2.667903852855 |
| C | 2.589204649161 | -0.079994309179 | -3.937585629199 |
| C | 2.739288522107 | -1.335172077453 | -4.521591032298 |
| C | 3.420063213716 | -2.329693521562 | -3.826073763217 |
| C | 3.927161177438 | -2.052083742346 | -2.558149447446 |
| C | 4.699312472919 | -3.020116712217 | -1.748592693959 |
| C | 5.020243233227 | -4.306665920325 | -2.173654991238 |
| C | 5.775769708913 | -5.129919169342 | -1.343204360292 |
| C | 6.198134967076 | -4.646266240418 | -0.108844687950 |
| C | 5.843550566863 | -3.354141256406 | 0.255500784026  |
| C | 4.371782960686 | 2.428890347699  | 0.085619408920  |
| C | 3.798899074486 | 3.661860184383  | 0.370546756839  |
| C | 2.528408924451 | 3.692071667521  | 0.936911223781  |
| C | 1.874076364295 | 2.491714698240  | 1.200783779547  |
| C | 2.502152887918 | 1.289717870743  | 0.884838514217  |
| C | 1.895269045253 | -0.040215289223 | 1.112890570894  |
| C | 0.667255281235 | -0.234479099607 | 1.741832211076  |
| C | 0.184365520929 | -1.527137311933 | 1.916881493506  |
| C | 0.932652768826 | -2.599182320221 | 1.440485263617  |
| C | 2.150413228228 | -2.338835162116 | 0.826560117647  |
| H | 3.023374503159 | 1.096318348437  | -2.172050251759 |
| H | 2.074634681764 | 0.734133559541  | -4.450380941576 |

|   |                 |                 |                 |
|---|-----------------|-----------------|-----------------|
| H | 3.554441223633  | -3.313039072576 | -4.275859488809 |
| H | 4.690632196161  | -4.671855318377 | -3.146130056658 |
| H | 6.794099775946  | -5.255317560477 | 0.572407681560  |
| H | 6.145834620444  | -2.933996634800 | 1.216690005251  |
| H | 5.364703974864  | 2.356816306487  | -0.362671961413 |
| H | 4.349367087017  | 4.576894667791  | 0.147190762498  |
| H | 0.879117747963  | 2.501725822306  | 1.646241843244  |
| H | 0.098062925446  | 0.617986775940  | 2.109216680710  |
| H | 0.589974403768  | -3.629610027385 | 1.544692414348  |
| H | 2.778154036014  | -3.150603267277 | 0.455436690162  |
| N | 3.751776020071  | -0.835253426998 | -1.992868486915 |
| N | 5.108644105860  | -2.566534684663 | -0.540136230328 |
| N | 3.736829343506  | 1.275698352065  | 0.330122859159  |
| N | 2.625058263887  | -1.094085515628 | 0.680587067251  |
| H | 10.103159493848 | 0.967084148670  | -1.346218247837 |
| H | 7.411521472653  | 0.048860731435  | 5.093323165169  |
| H | -0.769256095764 | -1.696742011381 | 2.421561494213  |
| H | 2.044509231012  | 4.642013682842  | 1.174050981607  |
| H | 2.336640165663  | -1.540419433598 | -5.515723074070 |
| H | 6.033674806256  | -6.141380692808 | -1.664440377843 |
